1  
2  
3  
4  
5  
6  
7  
8  
9  
10  
11  
12  
13  
14  
15  
16  
17  
18  
19  
20  
21  
22  
23

**The Intergenic Small Non-Coding RNA *ittA* is Required for Optimal Infectivity and Tissue Tropism in *Borrelia burgdorferi***

Short title: The *ittA* sRNA alters borrelial infectivity

Diana N. Medina-Pérez<sup>1</sup>, Beau Wager<sup>2</sup>, Erin Troy<sup>2</sup>, Lihui Gao<sup>3, #a</sup>, Steven J. Norris<sup>3</sup>,  
Tao Lin<sup>3, #b</sup>, Linden Hu<sup>2</sup>, Jenny A. Hyde<sup>1</sup>, Meghan Lybecker<sup>4</sup> and Jon T. Skare<sup>1,\*</sup>

<sup>1</sup> Department of Microbial Pathogenesis and Immunology, Texas A&M University Health Science Center, Bryan, TX 77807, USA; <sup>2</sup> Department of Molecular Biology and Microbiology, Tufts University, School of Medicine, Boston, MA 02111, USA; <sup>3</sup> Department of Pathology and Laboratory Medicine, McGovern Medical School, University of Texas Health Science Center, Houston, Houston, TX 77030, USA; <sup>4</sup> Department of Biology, University of Colorado at Colorado Springs, Colorado Springs, CO 80918, USA

<sup>#a</sup> Current address: Department of Thoracic and Cardiovascular Surgery, The University of Texas MD Anderson Cancer Center, Houston, TX 77030, USA

<sup>#b</sup> Current address: Department of Molecular Virology and Microbiology, Baylor College of Medicine, Houston, TX 77030, USA

\*Corresponding author

email: [jskare@tamu.edu](mailto:jskare@tamu.edu)

24 **ABSTRACT (190 words)**

25 Post-transcriptional regulation via small regulatory RNAs (sRNAs) has been  
26 implicated in diverse regulatory processes in bacteria, including virulence. One class of  
27 sRNAs, termed *trans*-acting sRNAs, can affect the stability and/or the translational  
28 efficiency of regulated transcripts. In this study, we utilized a collaborative approach that  
29 employed data from infection with the *Borrelia burgdorferi* Tn library, coupled with Tn-seq,  
30 together with borrelial sRNA and total RNA transcriptomes, to identify an intergenic *trans*-  
31 acting sRNA, which we designate here as *ittA* for *infectivity*-associated and *tissue-tropic*  
32 sRNA locus *A*. The genetic inactivation of *ittA* resulted in a significant attenuation in  
33 infectivity, with decreased spirochetal load in ear, heart, skin and joint tissues. In addition,  
34 the *ittA* mutant did not disseminate to peripheral skin sites or heart tissue, suggesting a  
35 role for *ittA* in regulating a tissue-tropic response. RNA-Seq analysis determined that 19  
36 transcripts were differentially expressed in the *ittA* mutant relative to its genetic parent,  
37 including *vraA*, *bba66*, *ospD* and *oms28* (*bba74*). Subsequent proteomic analyses also  
38 showed a significant decrease of OspD and Oms28 (BBA74) proteins. To our knowledge  
39 this is the first documented intergenic sRNA that alters the infectivity potential of *B.*  
40 *burgdorferi*.

41

42

43 **AUTHOR SUMMARY**

44       Lyme disease is a tick-borne infection mediated by the spirochetal bacterium, *Borrelia*  
45 *burgdorferi*, that is responsible for greater than 300,000 infections in the United States  
46 per year. As such, additional knowledge regarding how this pathogen modulates its  
47 regulatory armamentarium is needed to understand how *B. burgdorferi* establishes and  
48 maintains infection. The identification and characterization of small, non-coding RNA  
49 molecules in living systems, designated as sRNAs, has recalibrated how we view post-  
50 transcriptional regulation. Recently, over 1,000 sRNAs were identified in *B. burgdorferi*.  
51 Despite the identification of these sRNAs, we do not understand how they affect infectivity  
52 or *B. burgdorferi* pathogenesis related outcomes. Here, we characterize the *ittA* *B.*  
53 *burgdorferi* sRNA and show that it is essential for optimal infection using murine  
54 experimental infection as our readout. We also track the effect of this sRNA on the  
55 transcriptional and proteomic profile as the first step in providing mechanistic insight into  
56 how this important sRNA mediates its regulatory effect.

57

## 58 INTRODUCTION

59 Lyme disease results from the infection by the spirochetal bacterium, *Borrelia*  
60 *burgdorferi*, and represents the most common vector-borne disease in the United States  
61 with an estimated 329,000 cases diagnosed each year [1]. *B. burgdorferi* is transmitted  
62 to mammalian hosts through the bite of infected *Ixodes* spp. ticks [2–4]. In humans, the  
63 infection is characterized by a flu-like illness and, in most instances, is accompanied by  
64 a skin lesion denoted as erythema migrans [5,6]. The subsequent infection, if effectively  
65 treated with antibiotics early in the development of Lyme disease, can be cleared. If  
66 untreated, *B. burgdorferi* can disseminate throughout the host to distal organs and tissues  
67 resulting in multiple pathologies, including carditis, various neuropathies, and arthritis  
68 [5,6].

69 *B. burgdorferi* oscillates in nature between vastly disparate environments of the tick  
70 vector and vertebrate hosts [2–4,7]. The enzootic life cycle of *B. burgdorferi* initiates by  
71 uninfected tick larvae feeding on an infected vertebrate (usually a small mammal or bird),  
72 resulting in the acquisition of the spirochete during the resulting blood meal [2–4]. The  
73 infected larvae then molt into a nymph and will seek another blood meal. It is at this point  
74 that *B. burgdorferi* infect vertebrate hosts, including dead end hosts such as humans. In  
75 order to survive in these changing host environments, *B. burgdorferi* alters its  
76 transcriptional and protein profiles [2,8,9]. Previous studies demonstrated that *B.*  
77 *burgdorferi* senses and responds to environmental cues such as temperature, pH, and  
78 dissolved gases, as well as unidentified host factors, to modulate its gene expression  
79 [10–19]. Despite significant insight into these processes, the mechanisms utilized by *B.*

80 *burgdorferi* to modulate its gene expression for environmental adaptation continues to be  
81 an area of active research.

82 In *B. burgdorferi*, several transcriptional regulators have been identified and  
83 characterized, as well as a growing list of DNA interacting proteins, which serve to alter  
84 borrelial gene expression either directly or indirectly [3,20–33]. Many of these regulators  
85 govern, in part, the production of surface proteins involved in borrelial virulence [20,34–  
86 37]. In addition to these regulators, recent results indicate that *B. burgdorferi* produces a  
87 battery of small non-coding RNA molecules, designated sRNAs [38–40]. The role and  
88 molecular mechanisms of the sRNAs in *B. burgdorferi*, or their impact on borrelial  
89 pathogenesis, is not well understood.

90 sRNA-mediated post-transcriptional regulation in bacteria commonly involves the  
91 alteration of transcript stability or translation efficiency; transcript targets include those  
92 that contribute to pathogenesis [41–43]. In addition, sRNAs can bind to proteins and  
93 modify protein activity [43–45]. As such, sRNAs encoded in intergenic regions of bacterial  
94 genomes are *trans*-acting regulators that can influence multiple, genetically unlinked  
95 transcripts [43,46–49]. These *trans*-acting sRNAs have partial complementarity to the  
96 transcripts they target. The resulting sRNA-mRNA duplex that forms can alter gene  
97 expression by multiple mechanisms including affecting mRNA stability, which can lead to  
98 the stabilization or the degradation of the mRNA [43,48,50–53]. The sRNA-mRNA duplex  
99 can also alter translation initiation, thus affecting translation efficiency [43,48,50–53]. The  
100 outcome of *trans*-acting sRNA gene regulation is an increase or decrease production of  
101 the encoded protein [43,48,50–53].

102        Recently, the sRNA transcriptome of *B. burgdorferi* was reported and 1,005 sRNA  
103 species were identified; many of these sRNAs are upregulated at 37°C, a condition that  
104 models the mammalian host temperature *in vitro* [40]. Independently, a Luminex-based  
105 procedure for the detection of Signature-tagged mutagenesis (STM) clones of the  
106 transposon (Tn) library of *B. burgdorferi* strain B31, identified several intergenic non-  
107 coding regions that, when genetically inactivated, exhibited infectivity deficits [54]. Here  
108 we further characterize one of these intergenic sRNAs, that maps to 17 kilobase linear  
109 plasmid (lp17) between *bbd18* and *bbd21*, which was designated as SR0736 [40]. We  
110 have renamed SR0736 as *ittA* for *infectivity-associated* and *tissue-tropic* sRNA A. We  
111 independently inactivated this locus and showed that mutants lacking *ittA* are significantly  
112 attenuated and do not disseminate to additional skin sites or heart tissue. To our  
113 knowledge this is the first intergenic sRNA that has been linked to infectivity and  
114 pathogenesis of *B. burgdorferi*. Taken together, our data suggests that *ittA* exerts its effect  
115 by engaging several unlinked genetic targets and altering their production in a manner  
116 that is required for optimal infection and dissemination throughout the host.

117

## 118 **RESULTS**

### 119 **Identification of sRNA associated with *B. burgdorferi* infectivity**

120        Given the importance of sRNAs in other pathogenic bacteria [41,43] and the  
121 population of sRNAs in *B. burgdorferi* that are induced at conditions that mimic the  
122 mammalian host temperature *in vitro* [40], we sought to determine if a subset of intergenic  
123 *trans*-acting sRNAs in *B. burgdorferi* contributed to borrelial pathogenesis. Initially, we  
124 utilized a *B. burgdorferi* transposon (Tn) mutant library [54], coupled with Tn-seq analysis

125 following mouse infection [55,56], to identify Tn insertions that mapped to intergenic (IG)  
126 regions or non-coding regions within the genome. We focused on intergenic Tn mutants  
127 that were represented in the initial *in vitro* grown inoculum used for infection but were  
128 substantially reduced following murine infection (Table 1). These data were overlapped  
129 with *B. burgdorferi* strain B31 sRNA annotations [40] to identify the Tn insertions that  
130 interrupted sRNAs. We identified eight such Tn mutants and tested their ability to  
131 establish infection as individual isolates by infecting C3H/HeN mice at a dose of  $10^4$  *B.*  
132 *burgdorferi* cells. After 21 days a qualitative assessment of infectivity was determined  
133 (Table 2). Five of eight sRNA Tn mutants displayed reduced infectivity relative to the  
134 parent strain, 5A18NP1 [57], with a reduction in culture positive sites ranging from 25%  
135 to 75% (Table 2). After this initial screen, we focused on the sRNA (SR0736; [40]) that  
136 maps between genes *bbd18* and *bbd21* of linear plasmid 17 (lp17), which demonstrated  
137 the most significantly attenuated phenotype of the strains evaluated (Tables 1 and 2).  
138 Based on the phenotype observed for *B. burgdorferi* cells that have a Tn insertion in the  
139 SR0736 sRNA, we designated SR0736 as *ittA* for *in*fection-associated and *tissue-tropic*  
140 sRNA A.  
141

142 **TABLE 1. Reduced prevalence of candidate sRNA mutants during murine infection,**  
 143 **based on Tn-seq<sup>a</sup>. Genetic mutations that either reduce (*guaA*, *dbpA*, *pncA*) or do**  
 144 **not affect (*bbg22*, *bbk52*, *bbb28*) are included for comparison.**  
 145

| Location of Tn insert              | sRNA ID <sup>b</sup> | Input 1 <sup>c</sup> | Input 2 <sup>c</sup> | Input 3 <sup>c</sup> | Output 1 <sup>d</sup> | Output 2 <sup>d</sup> | Output 3 <sup>d</sup> | Avg.Output /Avg.Input | Comments                                |
|------------------------------------|----------------------|----------------------|----------------------|----------------------|-----------------------|-----------------------|-----------------------|-----------------------|-----------------------------------------|
| cp26; <i>guaA</i> ( <i>bbb18</i> ) | N/A <sup>e</sup>     | 1.2032               | 0.7411               | 0.7736               | 0.0009                | 0.0018                | 0.0009                | 0.0013                | Control; attenuated                     |
| lp54; <i>dbpA</i> ( <i>bba24</i> ) | N/A <sup>e</sup>     | 0.0041               | 0.0073               | 0.0084               | ND <sup>f</sup>       | ND <sup>f</sup>       | ND <sup>f</sup>       | 0 <sup>g</sup>        | Control; attenuated                     |
| lp25; <i>pncA</i> ( <i>bbe22</i> ) | N/A <sup>e</sup>     | 0.0089               | 0.0045               | 0.0027               | ND <sup>f</sup>       | ND <sup>f</sup>       | 0.0003                | 0.0185                | Control; attenuated                     |
| lp28-2; <i>bbg22</i>               | N/A <sup>e</sup>     | 0.0672               | 0.0991               | 0.0927               | 0.1688                | 0.2016                | 0.0267                | 1.53                  | Unchanged                               |
| lp36; <i>bbk52</i>                 | N/A <sup>e</sup>     | 0.0005<br>7          | 0.0002<br>8          | 0.0003<br>8          | 0.0012<br>6           | 0.0007                | 0.0005<br>1           | 2.01                  | Unchanged                               |
| cp26; <i>bbb28</i>                 | N/A <sup>e</sup>     | 1.5432               | 1.0517               | 1.1083               | 1.3479                | 3.5336                | 4.1401                | 2.44                  | Unchanged                               |
| lp54; IG <i>bba34-bba36</i>        | SR0897               | 0.0201               | 0.0210               | 0.0085               | ND <sup>f</sup>       | ND <sup>f</sup>       | ND <sup>f</sup>       | 0 <sup>g</sup>        | 6.5x10 <sup>5</sup> reads <sup>h</sup>  |
| lp54; IG <i>bba66-bba68</i>        | SR0912               | 0.1001               | 0.1327               | 0.2092               | 0.0000<br>5           | ND <sup>f</sup>       | 0.0000<br>6           | 0.00025               | 6x10 <sup>5</sup> reads <sup>h</sup>    |
| cp26; IG <i>bbb03-bbb04</i>        | SR0948               | 0.2269               | 0.1362               | 0.0982               | 0.0001                | ND <sup>f</sup>       | 0.0006                | 0.0015                | 1.8x10 <sup>4</sup> reads <sup>h</sup>  |
| cp26; IG <i>bbb13-bbb14</i>        | SR0962               | 0.0258               | 0.0107               | 0.0062               | ND <sup>f</sup>       | ND <sup>f</sup>       | ND <sup>f</sup>       | 0 <sup>g</sup>        | 3x10 <sup>6</sup> reads <sup>h</sup>    |
| lp17; IG <i>bbd04-bbd05a</i>       | SR0725               | 0.0378               | 0.0323               | 0.0145               | ND <sup>f</sup>       | 0.0000<br>6           | ND <sup>f</sup>       | 0.00071               | 2x10 <sup>6</sup> reads <sup>h</sup>    |
| lp17; IG <i>bbd18-bbd21</i>        | SR0736/itt A         | 0.0244               | 0.0549               | 0.0454               | 0.0001                | ND <sup>f</sup>       | 0.0000<br>6           | 0.0013                | 1x10 <sup>5</sup> reads <sup>h</sup>    |
| lp28-3; IG <i>bbh36a-bbh36b</i>    | SR0795               | 0.1628               | 0.2209               | 0.1344               | 0.0000<br>5           | ND <sup>f</sup>       | 0.0000<br>6           | 0.00021               | 1x10 <sup>5</sup> reads <sup>h</sup>    |
| lp38; IG <i>bbj37-bbj41</i>        | SR0869               | 0.0384               | 0.0456               | 0.0337               | ND <sup>f</sup>       | ND <sup>f</sup>       | 0.0000<br>6           | 0.00051               | 2.5 x10 <sup>3</sup> reads <sup>h</sup> |

146  
 147 <sup>a</sup> Data following a 3 week infection with a library of Tn mutants [54]; <sup>b</sup> sRNAs from the *B. burgdorferi*  
 148 sRNA library [40];  
 149 <sup>c</sup> % of Tn-seq reads from the libraries made from the inoculum used for mouse infection; <sup>d</sup> % of Tn-seq  
 150 reads from the libraries made from bacteria recovered from infected mice; <sup>d</sup> Output is pooled data from 24  
 151 mice; <sup>e</sup> N/A = not applicable;  
 152 <sup>f</sup> ND = not detected; <sup>g</sup> indicates that no sequences were observed following Tn-seq; <sup>h</sup> represents rounded  
 153 number of reads from sRNA-specific libraries [40].  
 154  
 155



156 **TABLE 2. Infectivity of *B. burgdorferi* intergenic (IG) sRNA transposon mutants**  
 157 **relative to their genetic parent clone 5A18NP1<sup>a</sup>**  
 158

| Strain <sup>b</sup>     | sRNA ID <sup>c</sup> | Genomic location                | Ear | Skin <sup>d</sup> | Lymph node | Heart | Bladder | Joint | Total sites | % Positive Tissues |
|-------------------------|----------------------|---------------------------------|-----|-------------------|------------|-------|---------|-------|-------------|--------------------|
| <b>5A18NP1 (parent)</b> | N/A                  | N/A                             | 4/4 | 4/4               | 4/4        | 4/4   | 4/4     | 4/4   | 24/24       | 100%               |
| <b>T05TC355</b>         | SR0897               | lp54; IG <i>bba34-bba36</i>     | 3/4 | 3/4               | 3/4        | 3/4   | 3/4     | 3/4   | 18/24       | 75%                |
| <b>T10TC061</b>         | SR0912               | lp54; IG <i>bba66-bba68</i>     | 4/4 | 4/4               | 4/4        | 4/4   | 4/4     | 4/4   | 24/24       | 100%               |
| <b>T11TC387</b>         | SR0948               | cp26; IG <i>bbb03-bbb04</i>     | 4/4 | 4/4               | 4/4        | 4/4   | 4/4     | 4/4   | 24/24       | 100%               |
| <b>T10TC351</b>         | SR0962               | cp26; IG <i>bbb13-bbb14</i>     | 2/4 | 1/4               | 2/4        | 2/4   | 2/4     | 2/4   | 11/24       | 46%                |
| <b>T04TC273</b>         | SR0725               | lp17; IG <i>bbd04-bbd05a</i>    | 2/4 | 2/4               | 2/4        | 2/4   | 2/4     | 2/4   | 12/24       | 50%                |
| <b>T06TC412</b>         | SR0736               | lp17; IG <i>bbd18-bbd21</i>     | 0/4 | 1/4               | 3/4        | 0/4   | 2/4     | 0/4   | 6/24        | 25%                |
| <b>T08TC464</b>         | SR0795               | lp28-3; IG <i>bbh36a-bbh36b</i> | 4/4 | 4/4               | 4/4        | 4/4   | 4/4     | 4/4   | 24/24       | 100%               |
| <b>T09TC062</b>         | SR0853               | lp38; IG <i>bbj15a-bbj16</i>    | 3/4 | 2/4               | 3/4        | 3/4   | 3/4     | 3/4   | 17/24       | 71%                |

159  
 160 <sup>a</sup> Dose of 10<sup>4</sup> per strain of *B. burgdorferi* tested; <sup>b</sup> Transposons from Tn library of *B. burgdorferi* [54]  
 161 interrupting sRNAs;  
 162 <sup>c</sup> sRNAs from *B. burgdorferi* sRNA library [40]; <sup>d</sup> skin from abdomen (inoculation site).

163  
 164 Popitsch et al. identified *ittA* via deep sequencing and showed that the *ittA*-encoded  
 165 sRNA was made at a higher level when *B. burgdorferi* is grown at 37°C [40]. The sRNA  
 166 and 5' end deep sequencing data indicate that *ittA* is a processed intergenic sRNA (Fig.  
 167 1) [40,58]. The mapped primary 5' ends are upstream from the *ittA* sRNA with minimal  
 168 read coverage of the precursor RNA. In addition, the distal 5' transcriptional start site for  
 169 *ittA* overlaps with the transcription start site for *bbd18* on the opposite DNA strand (Fig.  
 170 1).

171 **Genetic inactivation of the *ittA* sRNA in *B. burgdorferi*.**

172 To independently test the role of the *ittA* sRNA in borreliac pathogenesis, we  
 173 genetically interrupted *ittA* as depicted in Fig. 2A. The parent strain is the B31 derivative

174 ML23 that lacks the 25 kb linear plasmid [59]. Due to the absence of Ip25, this strain is  
175 non-infectious in the murine model of experimental infection. However, when a region of  
176 Ip25, containing the *bbe22* gene, is provided in *trans* infectivity is restored and provides  
177 selective pressure for the maintenance of plasmids encoding it during experimental  
178 infection [60,61]. The shuttle vector pBBE22*luc* used here contains *bbe22* and the firefly  
179 luciferase reporter that facilitates bioluminescent imaging as reported previously  
180 [60,62,63].

181 The *ittA*-encoding sRNA was insertionally inactivated in the *B. burgdorferi* strain ML23  
182 (Fig. 2A). Transformants were selected with streptomycin and PCR was employed to  
183 distinguish the parent from potential *ittA*::Str<sup>R</sup> mutant candidates (Fig. 2B). The resulting  
184 *ittA* mutant strain was designated DM103. We then genetically restored the *ittA* sRNA in  
185 *cis* in strain DM103 by selecting for resistance to gentamicin and then screening for  
186 sensitivity to streptomycin (Fig. 2A). Candidates predicted to encode *ittA* were vetted  
187 further using PCR (Fig. 2C). The *ittA* complement strain was designated DM113.  
188 Following the aforementioned screen of the *ittA*::Str<sup>R</sup> mutant strain DM103 and the  
189 complement strain DM113, both were transformed with pBBE22*luc* so they could be  
190 tested in the murine experimental model of infection using a firefly luciferase reporter  
191 [60,62,63]. Note that all strains maintained plasmid content identical to the parent strain  
192 (data not shown).

193 To confirm that the *ittA* mutant and complement strains lacked and restored the *ittA*  
194 sRNA, respectively, both Northern blot and Reverse Transcriptase PCR (RT-PCR) were  
195 performed (Fig. 3). Notably, the *ittA* sRNA was detected in the parent strain ML23 and

196 the complement strain DM113 (Comp), but not in the mutant strain DM103 (*ittA*::Str<sup>R</sup>),  
197 when either Northern blot (Fig. 3A) or RT-PCR analysis was employed (Fig. 3B).

198 Considering the nature of intergenic sRNAs (i.e., between two annotated genes), one  
199 concern in deleting the *ittA* sRNA is the potential polar effect this alteration might have on  
200 expression of flanking genes. Here, we focused on the only intact encoding genes in the  
201 region, *bbd18* and *bbd21*. When RT-PCR was employed, no qualitative difference in  
202 *bbd18* or *bbd21* transcripts were observed between the parent, mutant, or complement  
203 strains (Fig. S1). Note that both *bbd19* or *bbd20* are no longer annotated as intact ORFs  
204 and, consistent with this, no transcript was detected for *bbd20* by RT-PCR for any of the  
205 strains (data not shown). Taken together, these data indicate that the inactivation of the  
206 *ittA* sRNA exhibits no polar effects. In addition, the ML23 parent, the *ittA* mutant, and the  
207 *cis* complement strains all grew similarly, indicating that the loss of the *ittA* sRNA did not  
208 impair replication of these borrelial strains under *in vitro* growth conditions (Fig. S2).

209

### 210 **The loss of the *ittA* attenuates *B. burgdorferi* infectivity**

211 We then evaluated the loss of the *ittA*-encoded sRNA on murine infectivity. To spatially  
212 and temporally track infection, C3H/HeN mice were inoculated at a 10<sup>3</sup> dose with the  
213 parent *B. burgdorferi* strain, the *ittA* mutant, and the complement. Light emission was  
214 quantified at the time points indicated in Fig. 4. As a background control for luminescence,  
215 a single infected mouse was not given the luciferase substrate D-luciferin (leftmost mouse  
216 in each panel, Fig. 4A). At the dose tested (10<sup>3</sup> *B. burgdorferi* cells), no signal is detected  
217 for any of the strains prior to day 4. At day 4, a clear signal is observed in mice infected  
218 with all three strains except for one mouse infected with the sRNA mutant strain (Fig. 4A).

219 Subsequently, the signal increased with a peak at day 7 and then decreased concomitant  
220 with the development of the adaptive immune response (Fig. 4A; [64]). All strains  
221 displayed similar light emission until day 10 when the *ittA*::Str<sup>R</sup> strain exhibited a reduction  
222 in signal and retained lower light emission through 21 days, e.g., the duration of the  
223 infectivity analysis (Fig. 4A). Consistent with the images obtained, quantification of *in vivo*  
224 luminescence from the mice revealed significantly lower light emission by the *ittA*::Str<sup>R</sup>  
225 strain compared to the parent on days 10 and on day 14 of infection (Fig. 4B). The  
226 complement strain DM113 emitted light comparable to the parent strain on days 7, 14  
227 and 21 (Fig. 4B). These results suggest that the *ittA* complement strain DM113 displays  
228 complete *in vivo* complementation during experimental infection (Fig. 4).

229 To further assess the phenotype of the *ittA* mutant and complement, the infected mice  
230 were sacrificed after 21 days and tissues cultured to qualitatively score for infection. As  
231 shown in Table 3, the *ittA* mutant that was needle inoculated on the ventral side  
232 (abdomen) is impaired in its ability to disseminate to peripheral ear skin and it is  
233 attenuated in its ability to disseminate and colonize heart tissue with infectivity reduced  
234 by 40%. In addition to this qualitative assessment of infection, we also scored for  
235 spirochete load using quantitative PCR (qPCR) analysis to enumerate borrelial genome  
236 copies relative to murine  $\beta$ -actin copies. As observed in Fig. 5, the *ittA* mutant had  
237 significantly lower bacterial burden in all tissues analyzed relative to its parent and  
238 complemented strains with the notable exception of the inguinal lymph node. The  
239 complemented strain exhibited bacterial burden comparable to the parent strain, thus  
240 demonstrating complete *in vivo* complementation during infection. When taken together  
241 with the *in vivo* imaging data shown in Fig. 4, these data suggest that the *ittA* sRNA is

242 required for optimal tissue tropism and/or dissemination during *B. burgdorferi*  
243 experimental infection.

244

245 **TABLE 3. Infectivity of the sRNA mutant strain relative to its parent and genetic**  
246 **complement<sup>a</sup>**

| Strain                     | Ear   | Inoculation site (skin) <sup>b</sup> | Lymph node | Heart | Bladder | Joint | Total sites | % Positive Tissues |
|----------------------------|-------|--------------------------------------|------------|-------|---------|-------|-------------|--------------------|
| ML23<br>pBBE22 <i>luc</i>  | 10/12 | 11/12                                | 12/12      | 11/12 | 12/12   | 12/12 | 68/72       | 94%                |
| DM103<br>pBBE22 <i>luc</i> | 1/13  | 12/13                                | 13/13      | 1/13  | 9/13    | 11/13 | 47/78       | 60%                |
| DM113<br>pBBE22 <i>luc</i> | 12/12 | 10/12                                | 12/12      | 12/12 | 12/12   | 12/12 | 70/72       | 97%                |

247 <sup>a</sup> Dose of 10<sup>3</sup> per strain of *B. burgdorferi* tested. <sup>b</sup> Skin from abdomen (inoculation site).

248

### 249 **Transcriptional profile of the *ittA* mutant**

250 *Trans*-acting sRNAs often regulate gene expression by base-pairing with target  
251 mRNAs affecting their stability and/or translation. Given the infectivity defect observed,  
252 we hypothesized that *ittA* regulates the expression of gene(s) that are important for  
253 infectivity and, specifically, skin and heart tissue colonization. We performed RNA-seq to  
254 compare the global transcriptional profile of the parent and the *ittA* mutant in an unbiased  
255 manner under *in vitro* conditions that mimic mammalian-like conditions. It is important to  
256 note that the cultures used for this analysis were also utilized for the subsequent  
257 proteomic analysis described below.

258 In our transcriptional comparison we detected 1,343 transcripts total (Table S1). From  
259 this group, we found 92 transcripts that exhibited more than +/- 1.4-fold change and were  
260 statistically significant ( $P_{adj} < 0.05$ ; Table S2). Further evaluation showed that the *ittA*  
261 mutant exhibited statistically significant, 2-fold change expression of 19 transcripts when  
262 compared to the parent (Fig. 6; shown as red spots; see Table S3). Of the 19, 13

263 transcripts were upregulated in the sRNA mutant strain, including transcripts predicted to  
264 be involved in pathogenesis (*vraA* [*bbi16*] [65]), as well as *bba66*, a locus required for  
265 effective transmission from the tick vector to mice and expressed during mammalian  
266 infection [66,67]. In addition, there were 6 transcripts downregulated in the sRNA mutant  
267 strain, including *ospD* (*bbj09*), *ospA* (*bba15*), and *oms28* (*bba74*) (Fig. 6). It is important  
268 to note that 73 additional genes showed statistical significance ( $P_{\text{adj}} < 0.05$ ) with a fold  
269 change range between +/-1.4 and +/-1.9 (Fig. 6; shown as gold spots; see Table S4). It  
270 is interesting to note that 64 of the significantly affected transcripts are from genes that  
271 are known to be BosR/RpoS regulated and 79.7% of them are upregulated in the *ittA*  
272 mutant. Overall, these results suggest that the *ittA* sRNA exerts a regulatory effect by  
273 either destabilizing or stabilizing several target transcripts or by indirectly altering the  
274 expression of these transcripts via an unknown regulatory mechanism. The net effect in  
275 the mutant cells lacking *ittA* is a dysregulation of several genes that may contribute to the  
276 decrease in fitness and in a reduction in infectivity potential observed.

277

### 278 **qRT-PCR confirms differential expression of transcripts in the *ittA* mutant**

279 We next utilized quantitative RT-PCR (qRT-PCR) to assess the expression of the  
280 candidate genes identified to validate our RNA-seq analysis (Fig. 6) using the parent, *ittA*  
281 mutant, and complement strains grown *in vitro* under mammalian-like conditions. A  
282 constitutively expressed gene, *flaB*, which was not affected by any of strains tested in this  
283 study, was used for normalization [17,18]. As a control, we tested *ospC* and found that  
284 this transcript was not affected by the loss of *ittA*, as predicted. Five genes were tested,  
285 *bba66*, *vraA*, *oms28* (*bba74*), *ospD*, and *ospA* (Fig. 7). The qRT-PCR confirmed the

286 upregulation or downregulation observed in the RNA-seq experiment for each gene (Fig.  
287 6 and 7) for the parent and *ittA* mutant. Unexpectedly, only *bba66* was restored to wild  
288 type levels in the complemented strain (Fig. 7). Notably, *bbd18* was one of the 19 genes  
289 that were differentially regulated. Our qualitative assay demonstrated *bbd18* was  
290 expressed in the mutant strain, but our RNA-seq data suggest it may be downregulated  
291 in the *ittA* mutant strain. We also attempted to quantify *bbd18* transcripts by both qRT-  
292 PCR and Northern blot analysis but were not successful using *in vitro* grown *B.*  
293 *burgdorferi*. Therefore, it is unclear whether *bbd18* expression is altered due to the *ittA*  
294 strain construction or *ittA*-dependent gene regulation.

295 A limitation in the RNA expression data is that expression of genes differentially  
296 expressed in the *ittA* mutant was not restored in the complemented mutant. It is possible  
297 that *ittA* is not processed at native levels in the complemented strain. The Northern blot  
298 analysis of *ittA* demonstrated that the major sRNA species is the same size and  
299 comparable to steady-state levels relative to the parent strain. However, when the  
300 Northern blot was overexposed, several bands unique to the complement sample were  
301 detected in addition to the major product (Fig. S3). Notably, several of these larger RNA  
302 transcripts differ between the parent and the complement strain, suggesting that these  
303 differences may affect the *in vitro* readouts tested. Furthermore, the downregulation of  
304 *bbd18* in the *ittA* mutant strain may be affecting gene regulation independently of *ittA*.

305

### 306 ***ittA* alters the borrelial proteome**

307 sRNAs often regulate translation initiation by occluding or releasing the ribosome  
308 binding site of transcripts [43,47,68]. In addition, sRNAs can bind within coding regions

309 of transcripts resulting in regulatory effects. We hypothesized that *ittA* might modulate  
310 translation efficiency of some transcripts at the post-transcriptional level [43,47,68]. To  
311 address this, we used a global proteomic screen to identify and quantify the entire borrelial  
312 proteome of both the parent and the *ittA* mutant under conditions that mimic mammalian-  
313 like conditions (Fig. 8). A total of 718 proteins were detected and are listed in Table S5.  
314 Of the 718 proteins, 637 were classified with False Discovery Rate (FDR) of 1% and 81  
315 with FDR of 5%.

316 The samples used for proteomic analyses were isolated from the same cultures as  
317 used for the RNA-seq analysis shown in Fig. 6. From this assessment we found two  
318 proteins, OspD and Oms28, that were affected the most by the loss of *ittA*; specifically,  
319 they were decreased 2.3- and 2.1-fold, respectively, in the *ittA* mutant (Fig. 8, red spots).  
320 In total, 69 proteins were significantly altered by the loss of *ittA*, but 67 of these proteins  
321 were in the range of fold change between 1.4- to 1.9-fold (Fig. 8, gold and red spots,  
322 respectively, and Table S6). Only one additional protein was made at a statistically higher  
323 level in the parent strain relative to the *ittA* mutant (BBG01); all other proteins that fit these  
324 criteria were made at higher levels in the *ittA* mutant (Fig. 8 and Table S6). Interestingly,  
325 one of the proteins upregulated with fold change of 1.9 in the *ittA* mutant is BBA66, as  
326 well as several additional RpoS-regulated surface proteins. Here a subset of RpoS-  
327 regulated proteins is synthesized at higher levels in the *ittA* mutant and thus may place  
328 the spirochetes at a selective disadvantage since their ectopic production may make them  
329 targets for antibody-mediated killing. Presumably this effect is amplified *in vivo* thereby  
330 mediating the phenotype observed. However, the complement corrects for this *in vivo* by  
331 rescuing the mutant in a manner that is not observed *in vitro*.



332 Since both the *ospD* and *oms28* transcripts were downregulated in the *ittA* mutant  
333 strain in RNA-seq data and proteomic data (Fig. 6 and 8), we hypothesize that *ittA*  
334 stabilizes these transcripts and thus allows for the increased translation of OspD and  
335 Oms28. We hypothesize that, in the absence of *ittA*, the *ospD* and *oms28* transcripts are  
336 destabilized, resulting in reduced levels of OspD and Oms28 proteins. To determine  
337 levels of OspD and Oms28 proteins in the *ittA* mutant strain, we performed Western blot  
338 analysis of proteins lysates from parent, the *ittA* mutant, and the complement grown *in*  
339 *vitro* under mammalian-like conditions probed with polyclonal antibodies directed against  
340 OspD and Oms28. We observed lower levels of OspD and Oms28 in the sRNA mutant  
341 than the parent, consistent with the proteomic analysis (Fig. 9). Of note, the complement  
342 did not produce OspD to levels similar to that observed in the parent strain, consistent  
343 with the expression of *ospD* not being restored in the qRT-PCR analysis (Fig. 7). For  
344 Oms28, the complement produced higher proteins levels than the mutant but not to the  
345 same level as the parent. These results demonstrate partial complementation of the *ittA*  
346 mutant relative to the parent strain using both qRT-PCR and Western immunoblot metrics  
347 of assessment.

348

## 349 **DISCUSSION**

350 Small non-coding RNAs (sRNAs) have emerged as an additional mechanism for the  
351 regulation of transcript levels or protein function. Specifically, base-pairing sRNAs, such  
352 as *trans*-acting sRNAs, bind to transcripts and modulate their expression by either altering  
353 their stability or their ability to be translated [47,49,69]. Alternatively, protein-binding  
354 sRNAs can bind to cellular proteins and modify their activity [44,45,48]. Regulation via

355 sRNAs is fast acting and functions as an additional layer in response to environmental  
356 signals [43,70]. Despite the significant effect on translation efficiency, it is important to  
357 note that the loss of a single sRNA species often has a limited effect on measurable  
358 phenotypes. This is likely due to the subtle effect of the sRNA-mRNA interaction and the  
359 lack of an absolute effect seen by this event; that is, transcripts are not entirely inhibited  
360 or activated depending on the relative abundance of these RNA molecules and the fine-  
361 tuning that is associate with the sRNA-mRNA transient interactions [71,72]. Modest  
362 phenotypes may also be due to redundancy, as a given mRNA can be regulated by  
363 multiple sRNAs; therefore, the elimination of a single sRNA may not drastically alter  
364 mRNA turnover or translation [43,71,72]. Nevertheless, sRNAs encoded by pathogenic  
365 bacteria are recognized as important players in adaptive responses with some identified  
366 as important effectors in regulatory pathways [43,68,73].

367 Due to the enzootic nature of *B. burgdorferi* and its ability to quickly adapt to  
368 environmental factors encountered during their lifecycle, we hypothesized that *B.*  
369 *burgdorferi* use sRNAs to affect post-transcriptional regulatory processes that calibrate  
370 these responses. Recently, 1,005 sRNAs were identified in *B. burgdorferi*, suggesting that  
371 these spirochetes exploit this type of genetic regulation [40]. However, how *B. burgdorferi*  
372 utilizes these sRNA candidates remains largely unknown. Understanding the role these  
373 sRNAs play in post-transcriptional gene regulation in *B. burgdorferi* should provide  
374 significant insight into how the Lyme disease spirochete refines its molecular pattern to  
375 survive and persist within the disparate environments that they reside, e.g., arthropods  
376 and mammals. In this study, we inactivated a *trans*-acting, intergenic (IG) sRNA,  
377 designated *ittA*, and demonstrated that this sRNA is required for optimal infection, as well

378 as dissemination to and/or survival in distal tissues. It was further shown that transcript  
379 and protein production are affected when the *ittA*-encoded sRNA is not expressed in *B.*  
380 *burgdorferi*. To our knowledge, no other intergenic sRNA from *B. burgdorferi* has been  
381 characterized to this extent.

382 As a first step to link a *B. burgdorferi* trans-acting intergenic sRNA to an infectivity  
383 phenotype, mice were infected with the transposon library of *B. burgdorferi* strain B31  
384 [54] and decreased infectivity was scored using Tn-seq [55]. These data were compared  
385 against the recently described *B. burgdorferi* sRNA-specific library to identify intergenic  
386 sRNA species that mapped to existing Tn mutants. We tested each identified intergenic  
387 sRNA Tn mutant individually using the experimental murine infection model. One sRNA  
388 mutant, initially described as SR0736 [40] and renamed *ittA* herein, exhibited the most  
389 severe infectivity defect. Subsequent *in vivo* imaging of an independently derived mutant  
390 in *ittA* confirmed the attenuated phenotype observed for the qualitative infectivity  
391 assessment (Table 2) relative to the parent and complement (Fig. 4). The inactivation of  
392 *ittA* affected tissue tropism of *B. burgdorferi* where spirochetes were cultured out of  
393 peripheral ear skin and heart in less than 8% of the samples tested (Table 2). Even though  
394 the qualitative assessment of infection showed some degree of colonization in the  
395 remaining tissues (except the lymph node), the total bacterial load of *B. burgdorferi* was  
396 significantly lower for the *ittA* mutant relative to the parent and complement strains (Fig.  
397 5). These data indicate that *ittA* is needed for optimal borrelial colonization and/or  
398 dissemination. Furthermore, it is important to note that the *ittA* complement strain DM113  
399 completely restored infectivity in a manner indistinguishable from the parent using

400 infection as our readout, indicating that the phenotype of the *ittA* mutant was due to its  
401 absence and not a second site mutation.

402 To globally assess the role of the *ittA* sRNA we used both transcriptomic and  
403 proteomic approaches to identify transcripts and proteins that are altered in its absence,  
404 respectively. Two proteins, OspD and Oms28 (BBA74), were produced at lower levels in  
405 the *ittA* mutant consistent with their respective transcripts being reduced in the mutant  
406 background. We hypothesize that the *ittA* sRNA might bind to the *ospD* and *oms28*  
407 transcripts, prevents their degradation, and consequently enhances OspD and Oms28  
408 translation. Whether this sRNA-mRNA interaction occurs and affects the *ospD* and *oms28*  
409 transcripts directly, or if this effect is due to other *ittA*-regulated targets that indirectly affect  
410 this process, remains to be determined.

411 We aimed to validate five of the nineteen transcripts identified as being altered due to  
412 the loss of the *ittA* sRNA: *ospA*, *ospD*, *oms28*, *vraA*, and *bba66*. Of these five, *bba66*  
413 and *vraA* have been associated with some aspect of mammalian-based virulence; four of  
414 these genes, including *ospA*, *ospD*, and *oms28*, as well as *bba66*, are expressed in the  
415 arthropod vector and some have significant phenotypes in this stage of the *B. burgdorferi*  
416 life cycle, particularly *ospA* and *bba66* [66,67,74–80]. OspA is a well characterized  
417 surface lipoprotein that functions as an adhesin in the midgut of *Ixodes* ticks [8,76,77,81].  
418 BBA66 is a 54 kDa encoded surface expressed lipoprotein that is upregulated during  
419 nymph blood meal and is highly expressed in the mammal for an extended period of time,  
420 suggesting a role in persistence [67]. Needle inoculation of mice with *B. burgdorferi* *bba66*  
421 mutants results in lower bacteria burden in joint tissue and significantly lower joint swelling  
422 relative to the parent strain, suggesting that BBA66 contributes to borrelial-mediated

423 inflammation [66]. Mutants in *bba66* are acquired by larvae and persist through molting,  
424 but were significantly impaired in their ability to infect mice when introduced by tick bite  
425 compared to that of mice fed upon by ticks seeded with wild type *B. burgdorferi*,  
426 suggesting a role for BBA66 in transmission [66]. Recently, an additional function of  
427 BBA66 was found, whereby BBA66 binds to the neuroglial and macrophage protein  
428 Daam1 [82]. Daam1 is in the formin family of proteins involved in regulating cytoskeletal  
429 reorganization in mammalian cells [83]. A prior study showed that Daam1 co-localized to  
430 pseudopods on macrophages that processed *B. burgdorferi* by coiling phagocytosis [84].  
431 A more recent report showed that BBA66 mediated the attachment of *B. burgdorferi* to  
432 these cells via the Daam1 protein [82]. Interestingly, the *bba66* mutant exhibited reduced  
433 levels of internalized *B. burgdorferi* while borrelial cells that produced greater amounts of  
434 BBA66 were phagocytosed more efficiently [82]. In the RNA-seq data shown (Fig. 6),  
435 higher expression of *bba66* was observed in the sRNA mutant compared to the parent.  
436 In addition, in Fig.8 and Table S6, the mutant has a 1.9 fold change increase in protein  
437 abundance of BBA66 relative to the parent (Fig. 8 and Table S6). It is tempting to  
438 speculate that the increase of *bba66* expression in the sRNA mutant may lead to  
439 increased phagocytosis and local clearance of *B. burgdorferi* by macrophages as a result  
440 of BBA66-mediated binding of Daam1. This could help explain the lower bacteria burden  
441 in the majority of the mice tissues examined in the sRNA mutant, where BBA66 levels are  
442 predicted to be greater (Fig. 4). In Fig. 10, predicted secondary structure of *ittA* and  
443 interaction with *bba66* is displayed. Whether this sRNA-mRNA interaction occurs and  
444 affects *bba66* transcript directly remains to be determined. Taken together, the

445 dysregulation of *bba66* expression may be an important factor in the phenotype observed  
446 for the *ittA* mutant (Fig. 4 and 5).

447 In addition to BBA66, several BosR/RpoS-regulated genes and the proteins they  
448 encode are present in the *ittA* mutant *in vitro* at higher levels than the parent (Fig. 6 and  
449 8), suggesting that the loss of this sRNA leads to mis-regulation of surface exposed  
450 proteins during mammalian infection. Additional RpoS-regulated targets are subject to  
451 mis-regulation in the *ittA* mutant include OspC, DbpA, DbpB, and BBK32, which all  
452 contribute to borrelial pathogenesis [60,85–92]. That these virulence-associated proteins  
453 are produced more in the mutant relative to the parent suggests that the defect here may  
454 be due to ectopic mis-regulation that place the spirochete at a selective disadvantage.  
455 Along these lines, previous studies have shown that the mis-regulation of *ospC*, in the  
456 form of constitutive expression, results in the clearance of *B. burgdorferi* in experimental  
457 infection [85,86]. It is thus likely that a coordinated mis-production of several of these  
458 proteins could have a detrimental synergistic effect that clears *B. burgdorferi* in  
459 experimentally infected mice.

460 One significant and confounding issue stemmed from the incomplete *in vitro*  
461 complementation of the *ittA* mutant. Notably, the *cis*-acting complement restored  
462 infectivity to wild type levels as assessed by all *in vivo* metrics tested, e.g., *in vivo* imaging  
463 as well as both qualitative and quantitative measure of infected tissues, *in vitro* indicators  
464 were not fully reinstated. Surprisingly, during *in vitro* growth, several of the transcripts and  
465 proteins affected by the absence of the *ittA* sRNA were not restored to wild type levels in  
466 the complement. It is possible that factors impacting the gene context for *ittA* (e.g. the  
467 presence of the downstream gentamicin cassette) or secondary genetic changes in the

468 complemented strain may affect *ittA* sRNA expression, processing, or stability during *in*  
469 *vitro* culture conditions. The *in vitro* complement strain results indicate some caveat to the  
470 mutant or complement strain construction (discussed below). However, the *in vivo* data  
471 demonstrate that *ittA* is an important factor for infectivity. As mentioned previously,  
472 additional RNA species containing *ittA* sequences were detected by Northern blot  
473 analysis in the complemented strain. Additional experimentation is planned to resolve this  
474 issue.

475 Of the five targets tested for transcript levels, only *bba66* was restored to wild type  
476 levels in the complemented strain. A predictive algorithm, IntaRNA (Freiburg RNA tools,  
477 [93]) indicated potential *ittA* binding site within the *bba66* transcript with the 5' loop of the  
478 predicted *ittA* secondary structure. We hypothesize that the *ittA-bba66* RNA interaction  
479 may lead to RNase-dependent degradation of the *bba66* transcript (Fig.10), since *bba66*  
480 is expressed in higher amounts in the *ittA* mutant than the parent and complement strains.  
481 Further study is needed to determine whether this mechanism is active in the case of  
482 *bba66* regulation.

483 At the protein level, we were limited by available antibody reagents and, of the two  
484 candidates tested, OspD, and Oms28, only Oms28 appeared partially restored to the  
485 levels observed in the parent strain in Western immunoblotting. Although the *cis*  
486 complementation strategy was designed to create as little a difference relative to the  
487 parent strain as possible, the addition of an additional antibiotic resistance marker may  
488 alter the expression of the *ittA* sRNA in a manner that yields an atypical regulatory  
489 response. In this regard, the Northern blot shown in Fig. 3, when exposed longer, showed  
490 a unique unprocessed form of the *ittA* sRNA (Fig. S3). Whether this contributes to the

491 complementation defect remains to be determined. Another possibility is that the overlap  
492 of the initial 5' transcription start site of *ittA* with the transcriptional start site of *bbd18* on  
493 the opposite DNA strand (Fig. 1) results in some interference that affects the ability of *ittA*  
494 to carry out its regulatory effect(s) or affects the levels of BBD18. Why this effect is limited  
495 to our *in vitro* studies but not observed *in vivo* is not clear. Further studies will be needed  
496 to address this experimental conundrum.

497 In conclusion, sRNA-mediated regulation has been proven to be complex but  
498 important in fine-tuning gene expression in many bacteria species [94,95]. Our findings  
499 indicate that the *ittA* sRNA is required for optimal infectivity and that its absence alters the  
500 expression and production of a number of genes and proteins, respectively. One  
501 possibility posits that *ittA* may help in a quick adaptive response that alters the translation  
502 efficiency in a number of transcripts. The effect of each gene regulated by *ittA* individually  
503 is subtle but collectively the net effect may result in the dysregulation of these targets,  
504 yielding a synergistic response that results in an attenuated phenotype. Here, there is an  
505 additional layer of complexity, seen in the form of tissue tropism, such that colonization  
506 at remote skin and cardiac tissue sites is impaired. This work thus suggests that sRNA-  
507 based regulation via *ittA* is important in maintaining appropriate levels of gene expression  
508 that promote *B. burgdorferi* colonization and dissemination during experimental infection.  
509

## 510 **MATERIALS AND METHODS**

### 511 **Bacteria strains and culture conditions**

512 Bacterial strains and plasmids used in this study are described in Table 4. *Escherichia*  
513 *coli* strains were grown aerobically at 37°C in Luria Broth (LB). Concentration of antibiotics



514 used in *E. coli* are as follows: kanamycin, 50 µg/ml; spectinomycin, 50 µg/ml; and  
 515 gentamicin, 5 µg/ml. *B. burgdorferi* strains were grown in BSK-II media supplemented with  
 516 6% normal rabbit serum (Pel-Freez Biologicals, Rogers, AR) under conventional  
 517 microaerobic conditions at 32°C, pH 7.6, under 1% CO<sub>2</sub> atmosphere, or conditions that  
 518 induce genes and gene products important in the mammalian environment, namely, 37°C,  
 519 pH 6.8, under 5% CO<sub>2</sub> atmosphere. *Borrelia burgdorferi* B31 ML23 [59] and derivative  
 520 strains were grown under antibiotic selective pressure, dependent on genetic  
 521 composition, with either kanamycin at 300 µg/ml, streptomycin at 50 µg/ml, or gentamicin  
 522 at 50 µg/ml. *B. burgdorferi* 5A18NP1 [57] was grown in the presence of kanamycin at  
 523 300 µg/ml and the *B. burgdorferi* transposon mutants [54] were grown in the presence of  
 524 both gentamicin at 50 µg/ml and kanamycin at 300 µg/ml.

525 **TABLE 4. Plasmids and strains used in this study.**  
 526

| <b><i>E. coli</i> strains</b>         | <b>Genotype</b>                                                                                                                                                                                                                               | <b>Comments/Ref.</b> |
|---------------------------------------|-----------------------------------------------------------------------------------------------------------------------------------------------------------------------------------------------------------------------------------------------|----------------------|
| Mach-1 <sup>TM</sup> -T1 <sup>R</sup> | F <sup>-</sup> φ80( <i>lacZ</i> )ΔM15 Δ <i>lacX74</i> <i>hsdR</i> (r <sub>K</sub> <sup>-</sup> m <sub>K</sub> <sup>+</sup> )<br>Δ <i>recA1398 endA1 tonA</i>                                                                                  | Invitrogen           |
| <b><i>B. burgdorferi</i> strains</b>  |                                                                                                                                                                                                                                               |                      |
| ML23                                  | <i>B. burgdorferi</i> B31 clonal isolate missing<br>lp25; parent strain.                                                                                                                                                                      | [59]                 |
| ML23<br>pBBE22 <i>luc</i>             | Clonal isolate of strain B31 lacking lp25;<br>shuttle vector encodes <i>bbe22</i> and <i>B.</i><br><i>burgdorferi</i> codon optimized <i>luc</i> gene<br>under the control of a strong borrelial<br>promoter ( <i>P<sub>flaB</sub>-luc</i> ). | [60]                 |
| DM103                                 | ML23 IG sRNA <i>ittA::Str<sup>R</sup></i> .                                                                                                                                                                                                   | This study           |
| DM103<br>pBBE22 <i>luc</i>            | DM103 background carrying shuttle vector<br>pBBE22 <i>luc</i> ; Str <sup>R</sup> and Kan <sup>R</sup> .                                                                                                                                       | This study           |
| DM113                                 | ML23 containing intact sRNA <i>ittA::Gen<sup>R</sup></i><br>complemented in <i>cis</i> in same genetic<br>location of lp17 (between genes <i>bbd18</i>                                                                                        | This study           |

|     |                    |                                                                                                         |            |
|-----|--------------------|---------------------------------------------------------------------------------------------------------|------------|
| 527 |                    | and <i>bdd21</i> ) using native promoter.                                                               |            |
| 528 | DM113              | DM113 background carrying shuttle vector                                                                |            |
| 529 | pBBE22 <i>luc</i>  | pBBE22 <i>luc</i> ; Gen <sup>R</sup> and Kan <sup>R</sup> .                                             |            |
| 530 | 5A18NP1            | <i>Borrelia burgdorferi</i> B31 clone missing                                                           | [57]       |
| 531 |                    | lp28-4 and lp56 with disruption of                                                                      |            |
| 532 |                    | <i>bbe02::Kan<sup>R</sup></i> .                                                                         |            |
| 533 | <b>Plasmids</b>    |                                                                                                         |            |
| 534 | pCR®-Blunt         | pCR®-Blunt vector, Kan <sup>R</sup> , Zeocin <sup>R</sup> .                                             | Invitrogen |
| 535 |                    |                                                                                                         |            |
| 536 | pKFSS1             | <i>B. burgdorferi</i> shuttle vector containing                                                         | [98]       |
| 537 |                    | P <sub>flgB</sub> -Str <sup>R</sup> cassette; Spec <sup>R</sup> in <i>E. coli</i> , Str <sup>R</sup> in |            |
| 538 |                    | <i>B. burgdorferi</i> .                                                                                 |            |
| 539 | pBSV2G             | <i>B. burgdorferi</i> shuttle vector containing                                                         | [100]      |
| 540 |                    | P <sub>flgB</sub> -Gen <sup>R</sup> cassette.                                                           |            |
| 541 | pBBE22 <i>luc</i>  | Borrelial shuttle vector containing <i>bbe22</i>                                                        | [60]       |
| 542 |                    | and <i>B. burgdorferi</i> codon-optimized <i>luc</i>                                                    |            |
| 543 |                    | gene under the control of a strong borrelial                                                            |            |
| 544 |                    | promoter (P <sub>flaB</sub> - <i>luc</i> ).                                                             |            |
| 545 | pCR2.1Bactin       | Murine β-actin gene cloned into pCR2.1                                                                  | [60]       |
| 546 |                    | vector; Kan <sup>R</sup> .                                                                              |            |
| 547 | pCR2.1 <i>recA</i> | <i>B. burgdorferi recA</i> gene cloned into                                                             | [60]       |
| 548 |                    | pCR2.1 vector; Kan <sup>R</sup> .                                                                       |            |
| 549 | pDM103             | <i>B. burgdorferi</i> IG sRNA <i>ittA</i> mutant                                                        | This study |
| 550 |                    | construct. Contains sequences 1280 bp                                                                   |            |
| 551 |                    | upstream of the sRNA, the P <sub>flgB</sub> -Str <sup>R</sup>                                           |            |
| 552 |                    | cassette from pKFSS1 inserted into the                                                                  |            |
| 553 |                    | sRNA sequence, and sequences 1233 bp                                                                    |            |
| 554 |                    | downstream of the sRNA; pCR®-Blunt                                                                      |            |
| 555 |                    | vector backbone; Str <sup>R</sup> and Kan <sup>R</sup> .                                                |            |
| 556 | pDM113             | Complement construct of the sRNA <i>ittA</i>                                                            | This study |
| 557 |                    | located in between genes <i>bdd18</i> and                                                               |            |
| 558 |                    | <i>bdd21</i> . Contains sequences 1359 bp                                                               |            |
| 559 |                    | upstream of sRNA, a gentamicin cassette                                                                 |            |
| 560 |                    | from pBSV2G, and 1171 sequences                                                                         |            |
| 561 |                    | downstream of the sRNA; pCR®-Blunt                                                                      |            |
| 562 |                    | vector backbone; Gen <sup>R</sup> and Kan <sup>R</sup> .                                                |            |

554

## 555 Transposon mutagenesis screen

556 Transposon mutants were obtained from the arrayed *B. burgdorferi* library [54]. In  
557 order to conduct Tn-seq experiments, a single pool containing all of the Tn mutants was  
558 generated by combining sub-pools containing 70-80 individual Tn mutants each

559 [54,96,97]. The Tn library was grown for 48 hours in the presence of kanamycin and  
560 gentamicin. Cell density was determined by dark-field microscopy. Groups of six 9-14  
561 week old C3H/HeJ mice (Jackson laboratories) were injected in the right flank with  $5 \times 10^5$   
562 *B. burgdorferi* by needle inoculation. As a control to prevent *in vitro* growth defects from  
563 affecting the results of the *in vivo* screen,  $5 \times 10^5$  organisms from the inoculum used to  
564 inject the mice were cultured in 12 ml BSK-II broth supplemented with kanamycin and  
565 gentamicin. The *in vitro* control cultures were grown for 3 days to parallel time in culture  
566 for the tissue cultures. The bacteria in the culture were collected using centrifugation for  
567 20 minutes at 3,000 x *g* and the pellet frozen at -80°C.

568 The mice infected with the transposon library were sacrificed two weeks post-infection.  
569 The tibiotarsal joint closer to the inoculation site was removed under aseptic conditions.  
570 The tibiotarsal joints from each group of injected mice were cultured together in 12 ml of  
571 BSK-II broth supplemented with kanamycin and gentamicin. The cultures were checked  
572 daily for growth. When the density of the cultures reached late exponential phase, the  
573 bacteria were centrifuged and the pellet frozen as described above.

574 Genomic DNA was obtained from the frozen bacteria pellets using a DNeasy Blood  
575 and Tissue Kit (Qiagen, Valencia, CA) as per the manufacturer's instructions. For the *in*  
576 *vivo* samples, genomic DNA obtained from the organ cultures of different groups of  
577 infected mice were pooled in relative proportions such that each library for sequencing  
578 represented the bacteria recovered from 24 mice. For the *in vitro* control samples, DNA  
579 recovered from the cultures of the inoculums were pooled to match the groups of mice  
580 pooled to make each of the *in vivo* sample libraries. Libraries for sequencing were  
581 constructed as described previously [97]. Briefly, an aliquot of the genomic DNA was

582 placed in a 2 ml microfuge tube and sheared by sonication. Cytosine tails (C-tails) were  
583 added to 1 µg sheared DNA using terminal deoxynucleotidyl transferase (TdT, Promega,  
584 Madison, WI). Transposon containing fragments were amplified in a PCR containing DNA  
585 from the TdT reaction as template and primers specific to the ColE1 site on the 5' end of  
586 the transposon, pMargent1 and the C-tail, olj376 (Table S7). To prepare the DNA for  
587 sequencing and further amplify the transposon-genomic DNA junction, a nested PCR  
588 reaction was performed using DNA from the first PCR as a template, a primer specific to  
589 the transposon end, pMargent2 (Table S7), and an indexing primer containing the specific  
590 sequences required for sequencing on an Illumina platform and where NNNNNN  
591 represents a six-base-pair barcode sequence allowing samples to be multiplexed in a  
592 single sequencing lane. Within an experiment, a unique indexing primer was used for  
593 each individual *B. burgdorferi* sample. A majority of the PCR products were between 200  
594 and 600 bp. The sequencing libraries made from the *in vitro* and *in vivo* samples were  
595 pooled at equal concentrations prior to sequencing. The pooled libraries were sequenced  
596 on an Illumina HiSeq 2500 at the Tufts University Core Facility as 50 bp single-end reads  
597 using the custom sequencing primer pMargent3 and the standard Illumina index primer.

598 Sequence data analysis was performed as described previously [97]. Briefly,  
599 sequenced reads were aligned to the *B. burgdorferi* B31 genome using the short read  
600 aligner Bowtie. A custom script was then used to compile the resulting SAM files into a  
601 Microsoft Excel spreadsheet with the number of reads aligned to each site or annotated  
602 gene listed. The frequency of transposon mutants with insertions in a particular site or  
603 gene in the population was assessed by determining the number of sequence reads  
604 aligned to that mutant or gene as a percentage of all reads in a given sample.

605

## 606 **Genetic inactivation of the *B. burgdorferi* *ittA* intergenic sRNA**

607 The intergenic (IG) small regulatory RNA (sRNA) located between genes *bbd18* and  
608 *bbd21* in lp17 was insertionally inactivated via homologous recombination by replacing  
609 the 3' end of the sRNA (nucleotides 11,820-11,850) with the  $P_{flgB}$ -*aadA* (streptomycin  
610 resistant; Str<sup>R</sup>) antibiotic cassette [98]. This sRNA was designated SR0736 by Popitsch  
611 *et al.* [40]. Based on the data obtained herein, we renamed the SR0736 sRNA *ittA*. DNA  
612 sequences that flanked the *ittA* sRNA locus were amplified using PCR with PrimeSTAR  
613 GXL polymerase (Takara, Mountain View, CA). For the upstream fragment, 1280 bp were  
614 amplified using primers US-F and US-SpecR (see Table S7). The 1266 bp fragment  
615 containing  $P_{flgB}$ -Str<sup>R</sup> was PCR amplified from pKFSS1 [98] using the oligonucleotide  
616 primers pair US-SpecF and SpecDS-R (Table S7). An additional 1,233 bp PCR product,  
617 which amplified sequences downstream from the *ittA* sRNA, was engineered with primers  
618 SpecDS-F and DS-R (Table S7). All three fragments had 20 base pair overlap sequences  
619 and were assembled by overlap PCR [62,63,99].

620 For the creation of the sRNA *cis* complement strain, the  $P_{flgB}$ -Str<sup>R</sup> cassette of the sRNA  
621 mutant was replaced on lp17 using the native *ittA*-containing sequence with a linked  $P_{flgB}$ -  
622 Gent<sup>R</sup> marker downstream of the sRNA [100]. The US-F and compUS-gentR primers  
623 were used to PCR amplify the 1359 bp portion containing *ittA* (Table S7). The 983 bp  
624 gentamicin cassette from pBSV2G [100] was produced using primers compUS-gentF and  
625 compgentDS-R (Table S7). A 1171 bp region downstream from *ittA* was amplified using  
626 the primers compgent-DSF and compDS-R (Table S7). As before, all three fragments had  
627 20 base pair overlap sequences and were assembled by NEBuilder HiFi DNA Assembly

628 Master Mix (New England Biolabs, Ipswich, MA). All constructs were verified by Sanger  
629 sequencing prior to transformation into the *B. burgdorferi* strain B31 derivative ML23 [59]  
630 or DM103.

631

### 632 **Transformation of *B. burgdorferi***

633 *B. burgdorferi* were made competent for DNA transformation as previously described  
634 [62,63,90,101]. Prior to transformation via electroporation, all plasmid constructs were  
635 linearized with *Xho*I. Following antibiotic selection for the desired strain, putative  
636 transformants were tested for the presence of the genetic constructs using a PCR-based  
637 screen using primers from Table S7. Subsequent mutant or complemented strains were  
638 tested for *B. burgdorferi* strain B31 plasmid content by PCR [18].

639

### 640 **Infectivity studies and bioluminescent imaging**

641 Infectivity studies were performed as previously described [60,62,63,90]. Briefly, 8-  
642 week-old C3H/HeN female mice were inoculated with  $10^3$  organisms of the *B. burgdorferi*  
643 parent strain ML23/pBBE22*luc*, the sRNA *ittA*::Str<sup>R</sup> strain DM103/pBBE22*luc*, or the  
644 genetic complement strain DM113/pBBE22*luc*, by intradermal injection in the abdomen  
645 skin. For the parent and complement strains, twelve mice were infected, for the sRNA  
646 inactivation strain, thirteen mice were infected.

647 The bioluminescent imaging was performed as done previously [60,62,63]. Briefly, five  
648 mice were imaged for the parent and mutant strains and four mice were imaged for the  
649 complement strain per experiment. The mice were injected intraperitoneally with 5 mg of  
650 D-luciferin dissolved in 100  $\mu$ L of PBS 10 minutes prior to imaging with an IVIS Spectrum

651 live animal imaging system (Caliper Life Sciences, Hopkinton, MA), with the exception of  
652 one mouse that was infected with each *B. burgdorferi* strain tested but did not receive D-  
653 luciferin substrate. This mouse served as a negative control for background luminescence  
654 [60]. Imaging of the mice was performed 1 hour and at 1, 4, 7, 10 14 and 21 days post-  
655 infection [60]. After 21 days, the mice were sacrificed and the ear, abdominal skin, inguinal  
656 lymph node, heart, bladder, and tibiotarsal joint tissues were collected from each mouse  
657 aseptically for *in vitro* cultivation. Samples from ear, abdominal skin, inguinal lymph node,  
658 heart and tibiotarsal joint tissues were also collected from these mice for qPCR analysis  
659 of *B. burgdorferi* burden as described previously [60,90].

660

#### 661 **RNA Isolation for conventional RT-PCR and qRT-PCR**

662 Three independent cultures of *B. burgdorferi* strains ML23 [59] (parent), the sRNA  
663 mutant strain DM103, and the genetic complement strain DM113, were grown to mid-log  
664 phase of  $5 \times 10^7$  cells per ml at either mammalian-like conditions, defined as: 37°C, pH  
665 6.8, under 5% CO<sub>2</sub> or at conventional microaerophilic conditions of 32°C, pH 7.6, under  
666 1% CO<sub>2</sub>. The cultures were centrifuged at 4500 x *g* for 20 minutes at 4°C, washed with 1  
667 ml PBS, and centrifuged at 14,000 rpm for 15 minutes. The pellet was resuspended in  
668 100 µl of sterile water and 300 µl of TRIzol (Invitrogen, Carlsbad, CA) was added prior to  
669 employing Direct-zol RNA Miniprep (Zymo Research, Irvine, Ca, USA) for total RNA  
670 isolation. The resulting RNA was treated with DNase I (Roche, Indianapolis, IN) and  
671 RNAsin (Promega, San Luis Obispo, CA) to eliminate contaminating DNA and inhibit  
672 RNase activity, respectively. To ensure that there was no contaminating genomic DNA in  
673 the cDNA reaction mixtures containing cDNA generated without reverse transcriptase



674 were also included as controls. For conventional RT-PCR, 200 ng of total RNA from *B.*  
675 *burgdorferi* strains grown under conventional microaerophilic conditions were used to  
676 reverse transcribe into cDNA using primer sRNA R (Table S7) and SuperScript III  
677 (Thermo Fisher Scientific, Waltham, MA). Primers sRNA F and sRNA R (Table S7) were  
678 used to amplify *ittA*. For conventional RT-PCR of genes *bbd18* and *bbd21*, 1 µg of total  
679 RNA from *B. burgdorferi* strains grown under mammalian-like conditions were used for  
680 reverse transcription into cDNA using random primers (Thermo Fisher Scientific,  
681 Waltham, MA) and SuperScript III (Thermo Fisher Scientific, Waltham, MA).  
682 Oligonucleotide primers for *bbd18* and *bbd21* (Table S7) were used to amplify the genes.

683 For qRT-PCR analysis, 1 µg of total RNA from *B. burgdorferi* strains grown under  
684 mammalian-like conditions were used for reverse transcription into cDNA using random  
685 primers (Thermo Fisher Scientific, Waltham, MA) and SuperScript III (Thermo Fisher  
686 Scientific, Waltham, MA). Oligonucleotide primers from Table S7 were used to amplify  
687 specific *B. burgdorferi* strain B31 targets. Template cDNAs generated by the strains under  
688 the same conditions were normalized by using the constitutively expressed *flaB* gene as  
689 previously described [10,18] with the  $\Delta\Delta C_t$  method, in which the quantity of a given  
690 transcript is determined by the equation  $2^{-\Delta\Delta C_t}$ , where  $C_t$  is the cycle number of the  
691 detection threshold.

692

### 693 **Northern blot Analysis**

694 Northern blotting of SR0736/*ittA* was conducted using the same probe described  
695 previously [40,102] from RNA extracted from *B. burgdorferi* strains grown under  
696 conditions that mimic mammalian-like conditions.



697

## 698 **DNA extraction of *B. burgdorferi* from infected tissues and qPCR analysis**

699 Total DNA was isolated from ear, abdominal skin, inguinal lymph node, heart, and  
700 tibiotarsal joint using Roche High Pure PCR template preparation kit (Roche, Indianapolis,  
701 IN) as previously described [62,63,90]. Total DNA of 100 ng was used for each qPCR  
702 reaction. Quantitative real-time PCR analysis was conducted using the Applied  
703 Biosystems StepOnePlus Real-Time PCR system. *B. burgdorferi* genome copies and  
704 mammalian cell equivalents were determined using oligonucleotide primers in Table S7.

705

## 706 **RNA Sequencing (RNA-seq)**

707 Three independent cultures of *B. burgdorferi* cells were grown to mid-log phase of  $5 \times$   
708  $10^7$  cells per ml at 37°C, pH 6.8 and 5% CO<sub>2</sub>, e.g., *in vitro* conditions that mimic  
709 mammalian-like infection. Cells were centrifuged at 4,500 x *g* for 30 minutes at 4°C.  
710 Approximately  $1 \times 10^9$  cells were lysed in 1ml of TRIzol (Invitrogen, Carlsbad, CA) and  
711 RNA extracted following manufacturer's instructions. RNA was checked for quality using  
712 the Agilent TapeStation 2200 standard RNA screen tape and quantified using the Qubit  
713 2.0 Broad Range RNA assay. Total RNA was normalized between all samples for  
714 sequencing library preparation using the TruSeq Stranded Total RNA library preparation  
715 kit with ribosomal depletion. Each sample was uniquely barcoded, then the libraries were  
716 pooled at equal concentrations. Library pools were sequenced on a 2 x 75 bp paired-end  
717 sequencing run generating ~15 million reads/sample by the Texas A&M Institute for  
718 Genome Sciences and Society (TIGSS).

719 After sequencing, a total of approximately 90.7 million 75 bp paired-end raw  
720 sequencing reads were checked to trim any adapter sequences and low quality bases  
721 using Trimmomatic [103]. Reads were scanned with a sliding window of 5 bp, cutting  
722 when the average quality per base drops below 20, then trimming reads at the beginning  
723 and end if base quality drops below 20, and finally dropping reads if the read length is  
724 less than 50. Thereafter, approximately 90 million filtered reads (99.2%) were mapped to  
725 the *Borrelia burgdorferi* strain B31 genome assembly (accession: GCF\_000008685.2)  
726 using HISAT version 2.1.0 [104]. Average mapping rate was about 85.8% (Table S8).  
727 Transcript wise counts were generated using featureCounts tool from the SUBREAD  
728 package [105]. In total, the transcripts of 1,343 *B. burgdorferi* genes were tracked in this  
729 analysis. Differentially expressed genes were identified using a 5% False Discovery Rate  
730 threshold and a 2-fold change cut off with DESeq2 [106].

731 The data accumulated from the RNA-seq analysis are available at BioProject via  
732 accession number PRJNA565255.

733

### 734 **Tandem Mass Tags (TMT)**

735 Three independent cultures of *B. burgdorferi* cells were grown to mid-log phase of  $5 \times$   
736  $10^7$  cells per ml at 37°C, pH 6.8 and 5% CO<sub>2</sub> (note: the cells used here were the same as  
737 those used for RNA-seq). Cells were centrifuged at 4,500 x g for 30 minutes at 4°C and  
738 washed twice with 10ml of cold PBS. Cells were resuspended in 50 mM triethylammonium  
739 bicarbonate (TEAB) and 5% SDS. Samples were quantified using Pierce BCA protein  
740 assay kit (Thermo Fisher Scientific, Waltham, MA) and 1.2 mg of protein was used for  
741 Tandem Mass tags (TMT) experiment. For this approach, protein extracts were isolated

742 from the cells, reduced, alkylated, and proteolytically digested overnight. Samples were  
743 labeled with the TMT reagents in a 6-plex experiment and combined before sample  
744 fractionation and clean up. Labeled samples were analyzed by high-resolution Orbitrap  
745 LC-MS/MS. Identification and quantification of proteins was performed using Proteome  
746 Discoverer 2.2 software. The University of Texas Southwestern proteomics core  
747 performed the TMT analysis. The total of 718 *B. burgdorferi* proteins were detected in  
748 this analysis based on False Discovery Rates of less than 5%.

749 The TMT raw data was deposited to MassIVE using Proteomic Xchange Consortium  
750 with the data set number of PXD015685.

751

## 752 **SDS PAGE and immunoblotting**

753 *Borrelia burgdorferi* protein lysates were resolved on a 12.5% polyacrylamide gel,  
754 transferred to a PVDF membrane, and blocked using non-fat powdered milk as done  
755 previously [90,107]. Primary antibodies were used at the following dilutions: anti-Oms28  
756 at 1:1000; anti-OspD at 1:5,000 and anti-FlaB at 1:5,000. Secondary antibodies with  
757 horseradish peroxidase (HRP) conjugates were used to detect immunocomplexes,  
758 specifically, anti-mouse Ig-HRP (Invitrogen, Carlsbad, CA, USA) or anti-rabbit Ig-HRP  
759 (GE Healthcare, Chicago, IL, USA) both diluted to 1:5,000. The membranes were washed  
760 extensively in PBS, 0.2% Tween-20, and developed using the Western Lighting  
761 Chemiluminescent Reagent plus system (Perkin Elmer, Waltham, MA, USA).

762

## 763 **Statistical analysis**

764 For real-time qPCR analysis, multiple unpaired *t*-test, one per tissue, were performed  
765 to analyze the strains and corrected for multiple comparisons using the Holm-Sidak  
766 method. For quantitative reverse transcription PCR (qRT-PCR), one-way ANOVA was  
767 performed to analyze the strains. For the analysis of *in vivo* luminescence of mice, two-  
768 way ANOVA was performed. For the proteome volcano plot, multiple unpaired *t*-test, one  
769 for each protein identified in the 1% False Discovery Rate (637 proteins), were performed  
770 between the strains and corrected for multiple comparisons by using the Holm-Sidak  
771 method. Significance was accepted when the *p*-values were less than 0.05 for all  
772 statistical analyses employed.

773

#### 774 **RNA target and structure prediction**

775 The coding sequence of gene *bba66* was subjected to RNA binding predictions using  
776 IntaRNA (Freiburg RNA Tools; [93] against the processed *ittA* sequence. Mfold was used  
777 to predict the secondary structure of *ittA* [108].

778

#### 779 **Ethics Statement**

780 Animal experiments were performed in accordance to National Institute of Health  
781 (NIH) Guide for Care and Use of Laboratory Animals. Animal experiments also followed  
782 the guidelines of the Association for Assessment and Accreditation of Laboratory Animal  
783 Care (AAALAC). Approval for animal procedures was given by Tufts University and  
784 Texas A&M University Institutional Animal Care and Use Committees (IACUC; protocols  
785 B2018-98 [Tufts] and 2015-0367 [Texas A&M]). Mice were euthanized in manner that

786 conforms to the guidelines put forth by the AVMA and was approved by Tufts University  
787 and Texas A&M University IACUC.

788

## 789 **ACKNOWLEDGEMENTS**

790 We thank Lauren Weise, Parmida Tehranchi, Kristen Sanchez, and Alexandra Powell  
791 for excellent technical assistance for the work done at Texas A&M University. We would  
792 like to thank Andrew Hillhouse and Kranti Konganti from the Texas A&M Institute for  
793 Genome Sciences & Society (TIGSS) for their help with RNA-seq and the subsequent  
794 data analysis. We also want to extend our gratitude to the University of Texas  
795 Southwestern Proteomics core, specifically Andrew Lemoff and Mohammad Goodarzi,  
796 for their guidance through the TMT analysis.

797

## 798 **REFERENCES**

799

- 800 1. Nelson CA, Saha S, Kugeler KJ, Delorey MJ, Shankar MB, Hinckley AF, et al.  
801 Incidence of Clinician-Diagnosed Lyme Disease, United States, 2005-2010.  
802 *Emerging Infectious Diseases*. 2015 Sep;21(9):1625–31.
- 803 2. Radolf JD, Caimano MJ, Stevenson B, Hu LT. Of ticks, mice and men: understanding  
804 the dual-host lifestyle of Lyme disease spirochaetes. *Nat Rev Microbiol*. 2012 Jan  
805 9;10(2):87–99.
- 806 3. Samuels DS. Gene regulation in *Borrelia burgdorferi*. *Annu Rev Microbiol*.  
807 2011;65:479–99.
- 808 4. Tilly K, Rosa PA, Stewart PE. Biology of Infection with *Borrelia burgdorferi*. *Infect Dis*  
809 *Clin North Am*. 2008 Jun;22(2):217–34.
- 810 5. Shapiro ED. *Borrelia burgdorferi* (Lyme disease). *Pediatr Rev*. 2014 Dec;35(12):500–  
811 9.
- 812 6. Steere AC, Coburn J, Glickstein L. The emergence of Lyme disease. *J Clin Invest*.  
813 2004 Apr 15;113(8):1093–101.

- 814 7. Kurtenbach K, Hanincová K, Tsao JI, Margos G, Fish D, Ogden NH. Fundamental  
815 processes in the evolutionary ecology of Lyme borreliosis. *Nat Rev Micro*. 2006  
816 Sep;4(9):660–9.
- 817 8. Samuels DS. Gene regulation in *Borrelia burgdorferi*. *Annu Rev Microbiol*.  
818 2011;65:479–99.
- 819 9. Brisson D, Drecktrah D, Eggers CH, Samuels DS. Genetics of *Borrelia burgdorferi*.  
820 *Annual Review of Genetics*. 2012;46(1):515–36.
- 821 10. Brooks CS, Hefty PS, Jolliff SE, Akins DR. Global Analysis of *Borrelia burgdorferi*  
822 Genes Regulated by Mammalian Host-Specific Signals. *Infect Immun*. 2003  
823 Jun;71(6):3371–83.
- 824 11. Akins DR, Bourell KW, Caimano MJ, Norgard MV, Radolf JD. A new animal model  
825 for studying Lyme disease spirochetes in a mammalian host-adapted state. *J Clin*  
826 *Invest*. 1998 May 15;101(10):2240–50.
- 827 12. Carroll JA, Garon CF, Schwan TG. Effects of environmental pH on membrane  
828 proteins in *Borrelia burgdorferi*. *Infect Immun*. 1999 Jul;67(7):3181–7.
- 829 13. Ojaimi C, Brooks C, Casjens S, Rosa P, Elias A, Barbour A, et al. Profiling of  
830 Temperature-Induced Changes in *Borrelia burgdorferi* Gene Expression by Using  
831 Whole Genome Arrays. *Infect Immun*. 2003 Apr;71(4):1689–705.
- 832 14. Revel AT, Talaat AM, Norgard MV. DNA microarray analysis of differential gene  
833 expression in *Borrelia burgdorferi*, the Lyme disease spirochete. *PNAS*. 2002 Feb  
834 5;99(3):1562–7.
- 835 15. Stevenson B, Schwan TG, Rosa PA. Temperature-related differential expression of  
836 antigens in the Lyme disease spirochete, *Borrelia burgdorferi*. *Infect Immun*. 1995  
837 Nov;63(11):4535–9.
- 838 16. Carroll JA, Cordova RM, Garon CF. Identification of 11 pH-regulated genes in  
839 *Borrelia burgdorferi* localizing to linear plasmids. *Infect Immun*. 2000  
840 Dec;68(12):6677–84.
- 841 17. Hyde JA, Trzeciakowski JP, Skare JT. *Borrelia burgdorferi* Alters Its Gene  
842 Expression and Antigenic Profile in Response to CO<sub>2</sub> Levels. *J Bacteriol*. 2007  
843 Jan;189(2):437–45.
- 844 18. Seshu J, Boylan JA, Gherardini FC, Skare JT. Dissolved Oxygen Levels Alter Gene  
845 Expression and Antigen Profiles in *Borrelia burgdorferi*. *Infection and Immunity*.  
846 2004 Mar;72(3):1580.
- 847 19. Tokarz R, Anderton JM, Katona LI, Benach JL. Combined Effects of Blood and  
848 Temperature Shift on *Borrelia burgdorferi* Gene Expression as Determined by  
849 Whole Genome DNA Array. *Infect Immun*. 2004 Sep;72(9):5419–32.

- 850 20. Hübner A, Yang X, Nolen DM, Popova TG, Cabello FC, Norgard MV. Expression of  
851 *Borrelia burgdorferi* OspC and DbpA is controlled by a RpoN–RpoS regulatory  
852 pathway. Proc Natl Acad Sci U S A. 2001 Oct 23;98(22):12724–9.
- 853 21. Yang XF, Alani SM, Norgard MV. The response regulator Rrp2 is essential for the  
854 expression of major membrane lipoproteins in *Borrelia burgdorferi*. Proc Natl Acad  
855 Sci U S A. 2003 Sep 16;100(19):11001–6.
- 856 22. Samuels DS, Radolf JD. Who is the BosR around here anyway? Mol Microbiol.  
857 2009 Dec;74(6):1295–9.
- 858 23. Hyde JA, Shaw DK, Smith R, Trzeciakowski JP, Skare JT. The BosR regulatory  
859 protein of *Borrelia burgdorferi* interfaces with the RpoS regulatory pathway and  
860 modulates both the oxidative stress response and pathogenic properties of the  
861 Lyme disease spirochete. Mol Microbiol. 2009 Dec;74(6):1344–55.
- 862 24. Sanjuan E, Esteve-Gassent MD, Maruskova M, Seshu J. Overexpression of CsrA  
863 (BB0184) alters the morphology and antigen profiles of *Borrelia burgdorferi*. Infect  
864 Immun. 2009 Nov;77(11):5149–62.
- 865 25. Karna SLR, Sanjuan E, Esteve-Gassent MD, Miller CL, Maruskova M, Seshu J.  
866 CsrA Modulates Levels of Lipoproteins and Key Regulators of Gene Expression  
867 Critical for Pathogenic Mechanisms of *Borrelia burgdorferi*. Infect Immun. 2011 Feb  
868 1;79(2):732–44.
- 869 26. Sze CW, Li C. Inactivation of *bb0184*, which encodes carbon storage regulator A,  
870 represses the infectivity of *Borrelia burgdorferi*. Infect Immun. 2011  
871 Mar;79(3):1270–9.
- 872 27. Miller CL, Karna SLR, Seshu J. *Borrelia* host adaptation Regulator (BadR) regulates  
873 *rpoS* to modulate host adaptation and virulence factors in *Borrelia burgdorferi*.  
874 Molecular Microbiology. 2013 Apr;88(1):105–24.
- 875 28. Drecktrah D, Lybecker M, Popitsch N, Rescheneder P, Hall LS, Samuels DS. The  
876 *Borrelia burgdorferi* RelA/SpoT Homolog and Stringent Response Regulate  
877 Survival in the Tick Vector and Global Gene Expression during Starvation. PLOS  
878 Pathogens. 2015 Sep 15;11(9):e1005160.
- 879 29. Fisher MA, Grimm D, Henion AK, Elias AF, Stewart PE, Rosa PA, et al. *Borrelia*  
880 *burgdorferi* sigma54 is required for mammalian infection and vector transmission  
881 but not for tick colonization. Proc Natl Acad Sci USA. 2005 Apr 5;102(14):5162–7.
- 882 30. Bugrysheva J, Dobrikova EY, Godfrey HP, Sartakova ML, Cabello FC. Modulation  
883 of *Borrelia burgdorferi* Stringent Response and Gene Expression during  
884 Extracellular Growth with Tick Cells. Infect Immun. 2002 Jun;70(6):3061–7.
- 885 31. Savage CR, Jutras BL, Bestor A, Tilly K, Rosa PA, Tourand Y, et al. *Borrelia*  
886 *burgdorferi* SpoVG DNA- and RNA-Binding Protein Modulates the Physiology of the



- 887 Lyme Disease Spirochete. *Journal of Bacteriology*. 2018 Jun 15;200(12):e00033-  
888 18.
- 889 32. Ouyang Z, Deka RK, Norgard MV. BosR (BB0647) controls the RpoN-RpoS  
890 regulatory pathway and virulence expression in *Borrelia burgdorferi* by a novel  
891 DNA-binding mechanism. *Plos Pathogens*. 2011 Feb 10;7(2):e1001272–  
892 e1001272.
- 893 33. Dulebohn DP, Hayes BM, Rosa PA. Global Repression of Host-Associated Genes  
894 of the Lyme Disease Spirochete through Post-Transcriptional Modulation of the  
895 Alternative Sigma Factor RpoS. *PLOS ONE*. 2014 Mar 26;9(3):e93141.
- 896 34. Caimano MJ, Eggers CH, Hazlett KRO, Radolf JD. RpoS Is Not Central to the  
897 General Stress Response in *Borrelia burgdorferi* but Does Control Expression of  
898 One or More Essential Virulence Determinants. *Infect Immun*. 2004 Nov  
899 1;72(11):6433–45.
- 900 35. Burtnick MN, Downey JS, Brett PJ, Boylan JA, Frye JG, Hoover TR, et al. Insights  
901 into the complex regulation of *rpoS* in *Borrelia burgdorferi*. *Mol Microbiol*. 2007 Jul  
902 1;65(2):277–93.
- 903 36. Caimano MJ, Iyer R, Eggers CH, Gonzalez C, Morton EA, Gilbert MA, et al. Analysis  
904 of the RpoS regulon in *Borrelia burgdorferi* in response to mammalian host signals  
905 provides insight into RpoS function during the enzootic cycle. *Mol Microbiol*. 2007  
906 Sep;65(5):1193–217.
- 907 37. Stevenson B, Seshu J. Regulation of Gene and Protein Expression in the Lyme  
908 Disease Spirochete. In: Adler B, editor. *Spirochete Biology: The Post Genomic Era*  
909 [Internet]. Cham: Springer International Publishing; 2018. p. 83–112. Available  
910 from: [https://doi.org/10.1007/82\\_2017\\_49](https://doi.org/10.1007/82_2017_49)
- 911 38. Östberg Y, Bunikis I, Bergström S, Johansson J. The Etiological Agent of Lyme  
912 Disease, *Borrelia burgdorferi*, Appears To Contain Only a Few Small RNA  
913 Molecules. *J Bacteriol*. 2004 Dec 15;186(24):8472–7.
- 914 39. Arnold WK, Savage CR, Brissette CA, Seshu J, Livny J, Stevenson B. RNA-Seq of  
915 *Borrelia burgdorferi* in Multiple Phases of Growth Reveals Insights into the  
916 Dynamics of Gene Expression, Transcriptome Architecture, and Noncoding RNAs.  
917 *PLOS ONE*. 2016 Oct 5;11(10):e0164165.
- 918 40. Popitsch N, Bilusic I, Rescheneder P, Schroeder R, Lybecker M. Temperature-  
919 dependent sRNA transcriptome of the Lyme disease spirochete. *BMC Genomics*.  
920 2017;18:28.
- 921 41. Papenfort K, Vogel J. Regulatory RNA in bacterial pathogens. *Cell Host Microbe*.  
922 2010 Jul 22;8(1):116–27.



- 923 42. Pitman S, Cho KH. The Mechanisms of Virulence Regulation by Small Noncoding  
924 RNAs in Low GC Gram-Positive Pathogens. *Int J Mol Sci.* 2015 Dec  
925 14;16(12):29797–814.
- 926 43. Storz G, Vogel J, Wassarman KM. Regulation by small RNAs in bacteria: expanding  
927 frontiers. *Mol Cell.* 2011 Sep 16;43(6):880–91.
- 928 44. Babitzke P, Lai Y-J, Renda AJ, Romeo T. Posttranscription Initiation Control of  
929 Gene Expression Mediated by Bacterial RNA-Binding Proteins. *Annu Rev*  
930 *Microbiol.* 2019 Sep 8;73(1):43–67.
- 931 45. Elke eVan Assche, Sandra eVan Puyvelde, Jozef eVanderleyden, Hans P.  
932 Steenackers. RNA-binding proteins involved in post-transcriptional regulation in  
933 bacteria. *Frontiers in Microbiology.* 2015;
- 934 46. Ahmed W, Hafeez MA, Mahmood S. Identification and functional characterization  
935 of bacterial small non-coding RNAs and their target: A review. *Gene Reports.* 2018  
936 Mar 1;10:167–76.
- 937 47. Nitzan M, Rehani R, Margalit H. Integration of Bacterial Small RNAs in Regulatory  
938 Networks. *Annu Rev Biophys.* 2017 May 22;46(1):131–48.
- 939 48. Gottesman S, Storz G. Bacterial Small RNA Regulators: Versatile Roles and  
940 Rapidly Evolving Variations. *Cold Spring Harb Perspect Biol.* 2011 Dec  
941 1;3(12):a003798.
- 942 49. Dutta T, Srivastava S. Small RNA-mediated regulation in bacteria: A growing  
943 palette of diverse mechanisms. *Gene.* 2018 May 20;656:60–72.
- 944 50. Barik A, Das S. A comparative study of sequence- and structure-based features of  
945 small RNAs and other RNAs of bacteria. *RNA Biol.* 2017 Nov 3;1–9.
- 946 51. Melamed S, Peer A, Faigenbaum-Romm R, Gatt YE, Reiss N, Bar A, et al. Global  
947 Mapping of Small RNA-Target Interactions in Bacteria. *Molecular Cell.* 2016 Sep  
948 1;63(5):884–97.
- 949 52. Updegrove TB, Shabalina SA, Storz G. How do base-pairing small RNAs evolve?  
950 *FEMS Microbiol Rev.* 2015 May;39(3):379–91.
- 951 53. Pichon C, Felden B. Proteins that interact with bacterial small RNA regulators.  
952 *FEMS Microbiol Rev.* 2007 Sep 1;31(5):614–25.
- 953 54. Lin T, Gao L, Zhang C, Odeh E, Jacobs MB, Coutte L, et al. Analysis of an Ordered,  
954 Comprehensive STM Mutant Library in Infectious *Borrelia burgdorferi*: Insights into  
955 the Genes Required for Mouse Infectivity. *PLOS ONE.* 2012 Oct 25;7(10):e47532.

- 956 55. Tao eLin, Erin B Troy, Linden T Hu, Lihui eGao, Steven J Norris. Transposon  
957 mutagenesis as an approach to improved understanding of *Borrelia pathogenesis*  
958 and biology. *Frontiers in Cellular and Infection Microbiology*. 2014;
- 959 56. Troy EB, Lin T, Gao L, Lazinski DW, Camilli A, Norris SJ, et al. Understanding  
960 Barriers to *Borrelia burgdorferi* Dissemination during Infection Using Massively  
961 Parallel Sequencing. *Infect Immun*. 2013 Jul 1;81(7):2347–57.
- 962 57. Kawabata H, Norris SJ, Watanabe H. BBE02 Disruption Mutants of *Borrelia*  
963 *burgdorferi* B31 Have a Highly Transformable, Infectious Phenotype. *Infect Immun*.  
964 2004 Dec;72(12):7147–54.
- 965 58. Adams PP, Flores Avile C, Popitsch N, Bilusic I, Schroeder R, Lybecker M, et al. In  
966 vivo expression technology and 5' end mapping of the *Borrelia burgdorferi*  
967 transcriptome identify novel RNAs expressed during mammalian infection. *Nucleic*  
968 *Acids Research*. 2016 Nov 29;45(2):775–92.
- 969 59. Labandeira-Rey M, Skare JT. Decreased Infectivity in *Borrelia burgdorferi* Strain  
970 B31 Is Associated with Loss of Linear Plasmid 25 or 28-1. *Infect Immun*. 2001  
971 Jan;69(1):446–55.
- 972 60. Hyde JA, Weening EH, Chang M, Trzeciakowski JP, Höök M, Cirillo JD, et al.  
973 Bioluminescent imaging of *Borrelia burgdorferi* *in vivo* demonstrates that the  
974 fibronectin binding protein BBK32 is required for optimal infectivity. *Mol Microbiol*.  
975 2011 Oct;82(1):99–113.
- 976 61. Purser JE, Lawrenz MB, Caimano MJ, Howell JK, Radolf JD, Norris SJ. A plasmid-  
977 encoded nicotinamidase (PncA) is essential for infectivity of *Borrelia burgdorferi* in  
978 a mammalian host. *Molecular Microbiology*. 2003 May 1;48(3):753–64.
- 979 62. Wager B, Shaw DK, Groshong AM, Blevins JS, Skare JT. BB0744 Affects Tissue  
980 Tropism and Spatial Distribution of *Borrelia burgdorferi*. *Infect Immun*. 2015  
981 Sep;83(9):3693–703.
- 982 63. Zhi H, Weening EH, Barbu EM, Hyde JA, Höök M, Skare JT. The BBA33 lipoprotein  
983 binds collagen and impacts *Borrelia burgdorferi* pathogenesis. *Mol Microbiol*. 2015  
984 Apr;96(1):68–83.
- 985 64. Labandeira-Rey M, Seshu J, Skare JT. The Absence of Linear Plasmid 25 or 28-1  
986 of *Borrelia burgdorferi* Dramatically Alters the Kinetics of Experimental Infection via  
987 Distinct Mechanisms. *Infect Immun* 2003 Aug 1;71(8):4608–13.
- 988 65. Labandeira-Rey M, Baker EA, Skare JT. VraA (BBI16) Protein of *Borrelia*  
989 *burgdorferi* Is a Surface-Exposed Antigen with a Repetitive Motif That Confers  
990 Partial Protection against Experimental Lyme Borreliosis. *Infect Immun*. 2001 Mar  
991 1;69(3):1409–19.

- 992 66. Patton TG, Brandt KS, Nolder C, Clifton DR, Carroll JA, Gilmore RD. *Borrelia*  
993 *burgdorferi* *bba66* Gene Inactivation Results in Attenuated Mouse Infection by Tick  
994 Transmission. *Infection and Immunity*. 2013 Jul 1;81(7):2488–98.
- 995 67. Gilmore RD, Howison RR, Schmit VL, Nowalk AJ, Clifton DR, Nolder C, et al.  
996 Temporal Expression Analysis of the *Borrelia burgdorferi* Paralogous Gene Family  
997 54 Genes BBA64, BBA65, and BBA66 during Persistent Infection in Mice. *Infection*  
998 and *Immunity*. 2007 Jun 1;75(6):2753–64.
- 999 68. Beisel CL, Storz G. Base pairing small RNAs and their roles in global regulatory  
1000 networks. *FEMS Microbiol Rev*. 2010 Sep;34(5):866–82.
- 1001 69. Michaux C, Verneuil N, Hartke A, Giard J-C. Physiological roles of small RNA  
1002 molecules. *Microbiology*. 2014;160(6):1007–19.
- 1003 70. Dutcher HA, Raghavan R. Origin, Evolution, and Loss of Bacterial Small RNAs.  
1004 *Microbiol Spectr*. 2018 Apr;6(2):UNSP RWR-0004-2017.
- 1005 71. Barquist L, Vogel J. Accelerating Discovery and Functional Analysis of Small RNAs  
1006 with New Technologies. *Annual Review of Genetics*. 2015;49(1):367–94.
- 1007 72. Lybecker MC, Samuels DS. Small RNAs of *Borrelia burgdorferi*: Characterizing  
1008 Functional Regulators in a Sea of sRNAs. *Yale J Biol Med*. 2017 Jun 23;90(2):317–  
1009 23.
- 1010 73. Caldelari I, Chao Y, Romby P, Vogel J. RNA-Mediated Regulation in Pathogenic  
1011 Bacteria. *Cold Spring Harbor Perspectives in Medicine*. 2013 Sep 1;3(9):a010298–  
1012 a010298.
- 1013 74. Gilmore RD, Howison RR, Schmit VL, Carroll JA. *Borrelia burgdorferi* expression of  
1014 the *bba64*, *bba65*, *bba66*, and *bba73* genes in tissues during persistent infection in  
1015 mice. *Microb Pathog*. 2008 Dec;45(5–6):355–60.
- 1016 75. Liang FT, Nelson FK, Fikrig E. Molecular adaptation of *Borrelia burgdorferi* in the  
1017 murine host. *J Exp Med*. 2002 Jul 15;196(2):275–80.
- 1018 76. Caimano MJ, Eggers CH, Gonzalez CA, Radolf JD. Alternate Sigma Factor RpoS  
1019 Is Required for the In Vivo-Specific Repression of *Borrelia burgdorferi* Plasmid Ip54-  
1020 Borne *ospA* and *Ip6.6* Genes. *J Bacteriol*. 2005 Nov;187(22):7845–52.
- 1021 77. Yang XF, Pal U, Alani SM, Fikrig E, Norgard MV. Essential Role for *OspA/B* in the  
1022 Life Cycle of the Lyme Disease Spirochete. *J Exp Med*. 2004 Mar 1;199(5):641–8.
- 1023 78. Stewart PE, Bestor A, Cullen JN, Rosa PA. A Tightly Regulated Surface Protein of  
1024 *Borrelia burgdorferi* Is Not Essential to the Mouse-Tick Infectious Cycle. *Infect*  
1025 *Immun*. 2008 May;76(5):1970–8.

- 1026 79. Mulay VB, Caimano MJ, Iyer R, Dunham-Ems S, Liveris D, Petzke MM, et al.  
1027 *Borrelia burgdorferi* *bba74* Is Expressed Exclusively during Tick Feeding and Is  
1028 Regulated by Both Arthropod- and Mammalian Host-Specific Signals. *J Bacteriol.*  
1029 2009 Apr;191(8):2783–94.
- 1030 80. Ouyang Z, Narasimhan S, Neelakanta G, Kumar M, Pal U, Fikrig E, et al. Activation  
1031 of the RpoN-RpoS regulatory pathway during the enzootic life cycle of *Borrelia*  
1032 *burgdorferi*. *BMC Microbiology.* 2012;12:44.
- 1033 81. Pal U, Li X, Wang T, Montgomery RR, Ramamoorthi N, Desilva AM, et al. TROSPA,  
1034 an *Ixodes scapularis* receptor for *Borrelia burgdorferi*. *Cell.* 2004 Nov  
1035 12;119(4):457–68.
- 1036 82. Williams SK, Weiner ZP, Gilmore RD. Human neuroglial cells internalize *Borrelia*  
1037 *burgdorferi* by coiling phagocytosis mediated by Daam1. *PLOS ONE.* 2018 May  
1038 10;13(5):e0197413.
- 1039 83. Liu W, Sato A, Khadka D, Bharti R, Diaz H, Runnels LW, et al. Mechanism of  
1040 activation of the Formin protein Daam1. *PNAS.* 2008 Jan 8;105(1):210–5.
- 1041 84. Hoffmann A-K, Naj X, Linder S. Daam1 is a regulator of filopodia formation and  
1042 phagocytic uptake of *Borrelia burgdorferi* by primary human macrophages. *The*  
1043 *FASEB Journal.* 2014 Apr 2;28(7):3075–89.
- 1044 85. Xu Q, Seemanapalli SV, McShan K, Liang FT. Constitutive expression of outer  
1045 surface protein C diminishes the ability of *Borrelia burgdorferi* to evade specific  
1046 humoral immunity. *Infect Immun.* 2006 Sep;74(9):5177–84.
- 1047 86. Xu Q, McShan K, Liang FT. Identification of an *ospC* operator critical for immune  
1048 evasion of *Borrelia burgdorferi*. *Molecular Microbiology.* 2007 Apr 1;64(1):220–31.
- 1049 87. Grimm D, Tilly K, Byram R, Stewart PE, Krum JG, Bueschel DM, et al. Outer-  
1050 surface protein C of the Lyme disease spirochete: a protein induced in ticks for  
1051 infection of mammals. *Proc Natl Acad Sci USA.* 2004 Mar 2;101(9):3142–7.
- 1052 88. Pal U, Yang X, Chen M, Bockenstedt LK, Anderson JF, Flavell RA, et al. *OspC*  
1053 facilitates *Borrelia burgdorferi* invasion of *Ixodes scapularis* salivary glands. *J Clin*  
1054 *Invest.* 2004 Jan 15;113(2):220–30.
- 1055 89. Xu Q, Seemanapalli SV, McShan K, Liang FT. Increasing the Interaction of *Borrelia*  
1056 *burgdorferi* with Decorin Significantly Reduces the 50 Percent Infectious Dose and  
1057 Severely Impairs Dissemination. *Infection and Immunity.* 2007 Sep 1;75(9):4272–  
1058 81.
- 1059 90. Weening EH, Parveen N, Trzeciakowski JP, Leong JM, Höök M, Skare JT. *Borrelia*  
1060 *burgdorferi* Lacking DbpBA Exhibits an Early Survival Defect during Experimental  
1061 Infection. *Infect Immun.* 2008 Dec;76(12):5694–705.

- 1062 91. Seshu J, Esteve-Gassent MD, Labandeira-Rey M, Kim JH, Trzeciakowski JP, Höök  
1063 M, et al. Inactivation of the fibronectin-binding adhesin gene *bbk32* significantly  
1064 attenuates the infectivity potential of *Borrelia burgdorferi*. *Molecular Microbiology*.  
1065 2006 Mar 1;59(5):1591–601.
- 1066 92. Garcia BL, Zhi H, Wager B, Höök M, Skare JT. *Borrelia burgdorferi* BBK32 Inhibits  
1067 the Classical Pathway by Blocking Activation of the C1 Complement Complex. *Plos*  
1068 *Pathogens*. 2016 Jan 25;12(1):e1005404–e1005404.
- 1069 93. Busch A, Richter AS, Backofen R. IntaRNA: efficient prediction of bacterial sRNA  
1070 targets incorporating target site accessibility and seed regions. *Bioinformatics*. 2008  
1071 Dec 15;24(24):2849–56.
- 1072 94. Waters LS, Storz G. Regulatory RNAs in Bacteria. *Cell*. 2009 Feb 20;136(4):615–  
1073 28.
- 1074 95. Ternan N. Small regulatory RNA molecules in bacteria. 2013;8.
- 1075 96. Ramsey ME, Hyde JA, Medina-Perez DN, Lin T, Gao L, Lundt ME, et al. A high-  
1076 throughput genetic screen identifies previously uncharacterized *Borrelia burgdorferi*  
1077 genes important for resistance against reactive oxygen and nitrogen species. *PLOS*  
1078 *Pathogens*. 2017 Feb 17;13(2):e1006225.
- 1079 97. Troy EB, Lin T, Gao L, Lazinski DW, Lundt M, Camilli A, et al. Global Tn-seq  
1080 Analysis of Carbohydrate Utilization and Vertebrate Infectivity of *Borrelia*  
1081 *burgdorferi*. *Mol Microbiol*. 2016 Sep;101(6):1003–23.
- 1082 98. Frank KL, Bundle SF, Kresge ME, Eggers CH, Samuels DS. *aadA* Confers  
1083 Streptomycin Resistance in *Borrelia burgdorferi*. *Journal of Bacteriology*. 2003 Nov  
1084 15;185(22):6723–7.
- 1085 99. Site-directed mutagenesis by overlap extension using the polymerase chain  
1086 reaction. *Gene*. 1989 Apr 15;77(1):51–9.
- 1087 100. Elias AF, Bono JL, Kupko JJ, Stewart PE, Krum JG, Rosa PA. New antibiotic  
1088 resistance cassettes suitable for genetic studies in *Borrelia burgdorferi*. *J Mol*  
1089 *Microbiol Biotechnol*. 2003;6(1):29–40.
- 1090 101. Samuels DS, Drecktrah D, Hall LS. Genetic Transformation and Complementation.  
1091 In: Pal U, Buyuktanir O, editors. *Borrelia burgdorferi: Methods and Protocols*  
1092 [Internet]. New York, NY: Springer New York; 2018. p. 183–200. Available from:  
1093 [https://doi.org/10.1007/978-1-4939-7383-5\\_15](https://doi.org/10.1007/978-1-4939-7383-5_15)
- 1094 102. Lybecker M, Zimmermann B, Bilusic I, Tukhtubaeva N, Schroeder R. The double-  
1095 stranded transcriptome of *Escherichia coli*. *PNAS*. 2014 Feb 25;111(8):3134–9.
- 1096 103. Bolger AM, Lohse M, Usadel B. Trimmomatic: a flexible trimmer for Illumina  
1097 sequence data. *Bioinformatics*. 2014 Aug 1;30(15):2114–20.

- 1098 104. Kim D, Langmead B, Salzberg SL. HISAT: a fast spliced aligner with low memory  
1099 requirements. *Nature Methods*. 2015 Apr;12(4):357–60.
- 1100 105. Liao Y, Smyth GK, Shi W. featureCounts: an efficient general purpose program for  
1101 assigning sequence reads to genomic features. *Bioinformatics*. 2014 Apr  
1102 1;30(7):923–30.
- 1103 106. Love MI, Huber W, Anders S. Moderated estimation of fold change and dispersion  
1104 for RNA-seq data with DESeq2. *Genome Biology*. 2014;15(12):550–550.
- 1105 107. Seshu J, Boylan JA, Hyde JA, Swingle KL, Gherardini FC, Skare JT. A conservative  
1106 amino acid change alters the function of BosR, the redox regulator of *Borrelia*  
1107 *burgdorferi*. *Molecular Microbiology*. 2004;54(5):1352–63.
- 1108 108. Zuker M. Mfold web server for nucleic acid folding and hybridization prediction.  
1109 *Nucleic Acids Res*. 2003 Jul 1;31(13):3406–15.
- 1110  
1111



1112 **FIGURE LEGENDS**

1113

1114 **Figure 1.** Location of SR0736/*ittA* sRNA on linear plasmid 17 (lp17). The deep  
1115 sequencing results of the *ittA* sRNA are displayed in a coverage map. The negative strand  
1116 coverage is shown in blue and the positive strand coverage in green. The genomic context  
1117 is illustrated below the coverage maps: black arrows indicate the annotated ORFs, the  
1118 yellow box indicates the Northern probe used, and the wavy line is the proposed mature  
1119 sRNA species as determined by RNA-seq and Northern blot analysis. The red box  
1120 represents the antibiotic resistance marker that is inserted into the *ittA* sRNA locus to  
1121 obtain strain DM103. The sRNA is encoded in the positive strand and has two primary 5'  
1122 ends indicating transcriptional start sites (TSS) denoted by red arrows in the 5' end +  
1123 track. One of the TSS overlaps with the *bbd18* TSS, observed in the 5'end - track. The  
1124 sequencing results show the sRNA processed into its mature form.

1125

1126

1127 **Figure 2.** Strategy and confirmation of the insertional inactivation of the *ittA* sRNA. A.  
1128 Schematic representation of *ittA* insertional inactivation strategy. The region of lp17 from  
1129 the parent strain (ML23) is shown at the top. A  $P_{flgB}$ -Str<sup>R</sup> cassette was inserted into the 3'  
1130 end of the *ittA* sRNA and the mutant (DM103) was obtained following homologous  
1131 recombination. Following isolation of the mutant strain, the *ittA* sRNA locus was  
1132 reintroduced in the complemented strain (DM113). B. Primer pairs P1/P4, P2/P4 and  
1133 P1/P3 (Table S7) were used to confirm the presence of the  $P_{flgB}$ -Str<sup>R</sup> in the mutant  
1134 (*ittA*:Str<sup>R</sup>), relative to its parent strain by PCR. C. For the *cis* complementation of the *ittA*  
1135 sRNA mutant strain, the  $P_{flgB}$ -Str<sup>R</sup> cassette and the flanking region were replaced by the  
1136 *ittA* sRNA sequence linked to a  $P_{flgB}$ -Gent<sup>R</sup> cassette by a double crossover homologous

1137 recombination event. The resulting complement strain (Comp) was evaluated by PCR  
1138 using primer pairs P5/P6, P1/P6 and P5/P4 (Table S7). Note that the distances between  
1139 genetic loci are not shown to scale.

1140

1141 **Figure 3.** Confirmation that the *ittA* is not made in the mutant strain and is restored in the  
1142 genetic complement. A. Northern blot of total RNA isolated from the parent strain ML23  
1143 (denoted Parent), the sRNA mutant strain (*ittA*:Str<sup>R</sup>), and the *ittA cis* complemented strain  
1144 (denoted Comp). Detection of 5S from each strain serves as a loading control. B. RT-  
1145 PCR using purified total RNA from the *B. burgdorferi* ML23 (Parent), sRNA mutant  
1146 (*ittA*:Str<sup>R</sup>), and genetic complement (Comp) strains. The first three lanes had no reverse  
1147 transcriptase (RT) added to the reactions (indicated with a “-”) whereas the next three  
1148 lanes included reverse transcriptase (designated with a “+”). The DNA ladder is shown to  
1149 the left and base pair values are indicated. The arrow on the right indicates the presence  
1150 of the sRNA species observed in the parent and complement strains.

1151

1152 **Figure 4.** Spatial and temporal infectivity analysis of the *ittA* mutant. A. The course of  
1153 infection of bioluminescent *B. burgdorferi* strains was tracked following the infection of  
1154 C3H/HeN mice with 10<sup>3</sup> of each *B. burgdorferi* isolate. Mice were infected for 21 days  
1155 total with the parent (n=5), *ittA* sRNA mutant (n=5), and the *ittA* genetic complement (n=4)  
1156 and imaged on the time or day (d) listed on the left. For each image shown, the mouse  
1157 on the far left (denoted with a ‘-’) was infected with *B. burgdorferi* but did not receive D-  
1158 luciferin to serve as a background control. Mice denoted with a ‘+’ were infected with the  
1159 strain indicated and treated with D-luciferin to promote light emission. All images were



1160 normalized to the same scale (shown on the right). B. Quantification of *in vivo*  
1161 luminescence images of mice infected at a dose of  $10^3$  of *B. burgdorferi*. Parent strain  
1162 ML23/pBBE22*luc* is depicted as black circles, the *ittA* sRNA mutant DM103/pBBE22*luc*  
1163 as red squares, and the genetic complement strain DM113/pBBE22*luc* as blue triangles.  
1164 Each time point represents the average value and the standard error from the four mice  
1165 given D-luciferin substrate for the parent and sRNA mutant strains and three mice for the  
1166 complement strain. \* $p < 0.05$ ; \*\* $p < 0.01$ .

1167

1168 **Figure 5.** Quantitative assessment of *B. burgdorferi* load from infected mouse tissues.  
1169 Quantitative PCR (qPCR) of tissues from mice infected with the parental strain (black  
1170 circles; n=5), the *ittA* mutant (red squares; n=5), and the genetic complement (blue  
1171 triangles; n=4) was used to enumerate borrelial genomic equivalents relative to the  
1172 murine samples. Mice were infected with  $10^3$  dose of *B. burgdorferi* strains for 21 days.  
1173 Tissues tested are shown at the bottom: PS for peripheral ear skin; SK for abdomen skin  
1174 at the site of infection; LN for Lymph node; HT for heart; and JT for the tibiotarsal joint.  
1175 The results are represented as the number of borrelial *recA* genomic copies per  $10^6$   
1176 mouse  $\beta$ -actin copies. The horizontal line in each data set depicts the mean value. Each  
1177 data point shown represents an independent sample from a single mouse tissue assayed  
1178 in triplicate and averaged. \* $p < 0.05$ ; \*\*\* $p < 0.001$ .

1179

1180 **Figure 6.** Differential gene expression in the parent relative to the *ittA* mutant. The  
1181 volcano plot depicts  $\log_2$  fold change on the x-axis and False Discovery Rate adjusted  $p$   
1182 value (q -value ) on the y-axis. The parent and *ittA* mutant strain were grown in biological

1183 triplicates *in vitro* using conditions that induce proteins important for mammalian infection.  
1184 RNA was purified, and the samples subjected to RNA-seq. Single genes are depicted as  
1185 dots. Of the transcripts, 19 achieved significance with  $p$ -value  $<0.05$  and with greater  
1186 than 2-fold change in the mutant relative to the parent strain. Of the differentially  
1187 expressed genes, 13 were downregulated and 6 upregulated in the parent relative to the  
1188 mutant. Yellow spots (73 total) are transcripts that achieved significance with a  $p$ -value  
1189  $<0.05$  and a fold change range between  $\pm 1.4$  to 1.9.

1190

1191 **Figure 7.** Quantification of transcripts by qRT-PCR. Quantitative RT-PCR (qRT-PCR) of  
1192 the parent (black bars), *ittA* mutant (red bars), and complemented strain (blue bars) were  
1193 performed for a subset of transcripts indicated at the bottom of each panel. The data for  
1194 all samples were normalized to the endogenous control, *flaB*, whose transcription was  
1195 not affected by the conditions used in the experiment. The error bars indicate standard  
1196 error. Significance is denoted as \*  $p < 0.05$ , \*\*  $p < 0.01$ , \*\*\*  $p < 0.001$ . \*\*\*\*  $p < 0.0001$

1197

1198 **Figure 8.** Proteomic evaluation of the parent relative to the *ittA* mutant. Tandem Mass  
1199 tags (TMT) was used to determine the relative abundance of the total proteome of three  
1200 biological replicates of parent and *ittA* mutant strains grown under conditions that induce  
1201 proteins important during mammalian infection. Volcano plot depicts  $\log_2$  fold change ( $x$ -  
1202 axis) and  $\log_{10}$  adjusted  $p$ -value ( $y$ -axis) of proteins identified from parent versus the *ittA*  
1203 sRNA mutant strain. Single proteins are plotted as dots. Proteins outside of the red  
1204 dashed boxes are significant. Red spots have a  $\pm 2$  fold change difference in the parent  
1205 strain relative to the *ittA* mutant strain and a  $p$ -value  $< 0.05$ . Yellow spots are proteins that

1206 achieved significance of  $p$ -value  $< 0.05$  and a fold change range between +/- 1.4 to 1.9.  
1207 OspD and Oms28 were found to be significantly higher in abundance in the parent relative  
1208 to the *ittA* mutant.

1209

1210 **Figure 9.** Evaluation of OspD and Oms28 in *B. burgdorferi* lacking *ittA*. Protein lysates  
1211 were derived from parent, *ittA* sRNA mutant (*ittA*:Str<sup>R</sup>), and complement (Comp) strains  
1212 grown under conditions that induce proteins important during mammalian infection *in vitro*  
1213 and probed against anti-OspD (panel A) and anti-Oms28 (panel B). The production of  
1214 FlaB was used as a loading control for both immunoblots shown.

1215

1216 **Figure 10.** IntaRNA (Freiburg RNA Tools) predictions of interactions of the *ittA* sRNA with  
1217 the *bba66* transcript. A. A predicted secondary structure of the *ittA* sRNA (mfold). B.  
1218 Potential interaction of the *ittA* sRNA (lower) within the coding sequence of *bba66* (upper).  
1219 The red depicts the *bba66* stop codon.

1220

1221

1222

1223 **SUPPLEMENTAL TABLE DESCRIPTIONS**

1224

1225 **Table S1.** Transcriptome of Parent and Mutant *ittA* strains. Deseq2 analysis was  
1226 employed to the RNA-seq of Parent and the *ittA* mutant strains. A total of 1,343 transcripts  
1227 were expressed in the Parent and the Mutant *ittA*, grown *in vitro* at mammalian-like  
1228 conditions.

1229

1230 **Table S2.** Differentially expressed transcripts with a fold change of at least (+/- 1.4) in  
1231 Parent versus the *ittA* mutant strain. Deseq2 analysis was employed to the RNA-seq of  
1232 Parent and Mutant strains grown *in vitro* at mammalian-like conditions. A total of 92  
1233 transcripts were differentially expressed between the groups at the +/-1.4-fold change  
1234 cutoff.

1235

1236 **Table S3.** Differentially expressed transcripts with fold change (+/- 2) in Parent vs versus  
1237 the *ittA* mutant strain. Deseq2 analysis was employed to the RNA-seq of Parent and  
1238 Mutant strains grown *in vitro* at mammalian-like conditions. A total of 19 transcripts were  
1239 differentially expressed between the groups at the +/- 2-fold change cutoff.

1240

1241 **Table S4.** Differentially expressed transcripts with fold change in the range of (+/- 1.4 to  
1242 1.9) in Parent versus the *ittA* mutant strain. Deseq2 analysis was employed to the RNA-  
1243 seq of Parent and Mutant strains grown *in vitro* at mammalian-like conditions. A total of  
1244 73 transcripts were differentially expressed between the groups at the +/- 1.4 to 1.9-fold  
1245 change cutoff.

1246

1247 **Table S5.** Proteome of the Parent and Mutant *ittA* strains. A total of 718 proteins were  
1248 identified by employing Tandem Mass Tags (TMT) proteomics technologies to Parent and  
1249 Mutant strains, grown at mammalian-like conditions.

1250

1251 **Table S6.** Relative abundance of proteins with fold change of at least (+/- 1.4) in Parent  
1252 versus the *ittA* mutant strain. A total of 69 proteins were identified with a fold change cutoff  
1253 of +/- 1.4 and with an adjusted *p*-value of <0.05 between the groups.

1254

1255 **Table S7.** Oligonucleotides used in this study.

1256

1257 **Table S8.** Raw reads of the RNA-seq experiment between the Parent and the *ittA* Mutant  
1258 groups. Three biological replicates of strains Parent and the *ittA* Mutant were grown *in*  
1259 *vitro* at mammalian-like conditions and subjected to RNA-seq analysis.

1260

1261

1262 **SUPPLEMENTAL FIGURE LEGENDS**

1263

1264 **Figure S1.** The expression of genes *bbd18* and *bbd21* are not affected in the *ittA* sRNA  
1265 mutant strain. The parent, sRNA mutant (*ittA::Str<sup>R</sup>*) and complement (Comp) strains were  
1266 grown *in vitro* and total RNA was purified from each. Oligonucleotide primers specific for  
1267 *bbd18* and *bbd21* were used without (-) and with (+) added reverse transcriptase (RT).  
1268 The DNA ladder is shown at the left and the corresponding base pair values are indicated.  
1269

1270 **Figure S2.** *In vitro* growth of the *B. burgdorferi* strains used in this study. The *B.*  
1271 *burgdorferi* parent strain, the *ittA* sRNA mutant (*ittA::Str<sup>R</sup>*) and the sRNA complement  
1272 strain (Comp) were grown in conventional microaerophilic conditions of 32°C, 1% CO<sub>2</sub>,  
1273 pH 7.6 in triplicate in BSK-II media and enumerated by dark field microscopy daily out to  
1274 day 9. No significant differences in growth were observed. Similar growth kinetics were  
1275 observed between these three strains when the cells were grown at conditions of 37°C,  
1276 5% CO<sub>2</sub> and pH 6.8 (data not shown). Data points shown reflect average value with  
1277 standard error.

1278

1279 **Figure S3.** Overexposed Northern Blot reveals additional sRNA bands in the complement  
1280 strain. Three biological replicates of the *B. burgdorferi* parent strain, the sRNA mutant  
1281 (*ittA::Str<sup>R</sup>*) and the sRNA complement strain (Comp), were grown in mammalian-like  
1282 conditions, RNA was purified and the *ittA* probe was used for Northern blot analysis at  
1283 longer exposure. The *ittA* mutant does not expressed *ittA*, as expected. The stable  
1284 processed form of *ittA* is observed as the dark band underneath the 100 nucleotide  
1285 marker. The parent and complement strains expression of *ittA* is comparable, but

1286 between 800 and 300 nucleotides, the complement strain exhibits additional bands that  
1287 are missing in the parent strain and could possibly contribute to the partial  
1288 complementation of the strain *in vitro*. The marker is shown in nucleotides at the left of  
1289 the blot.

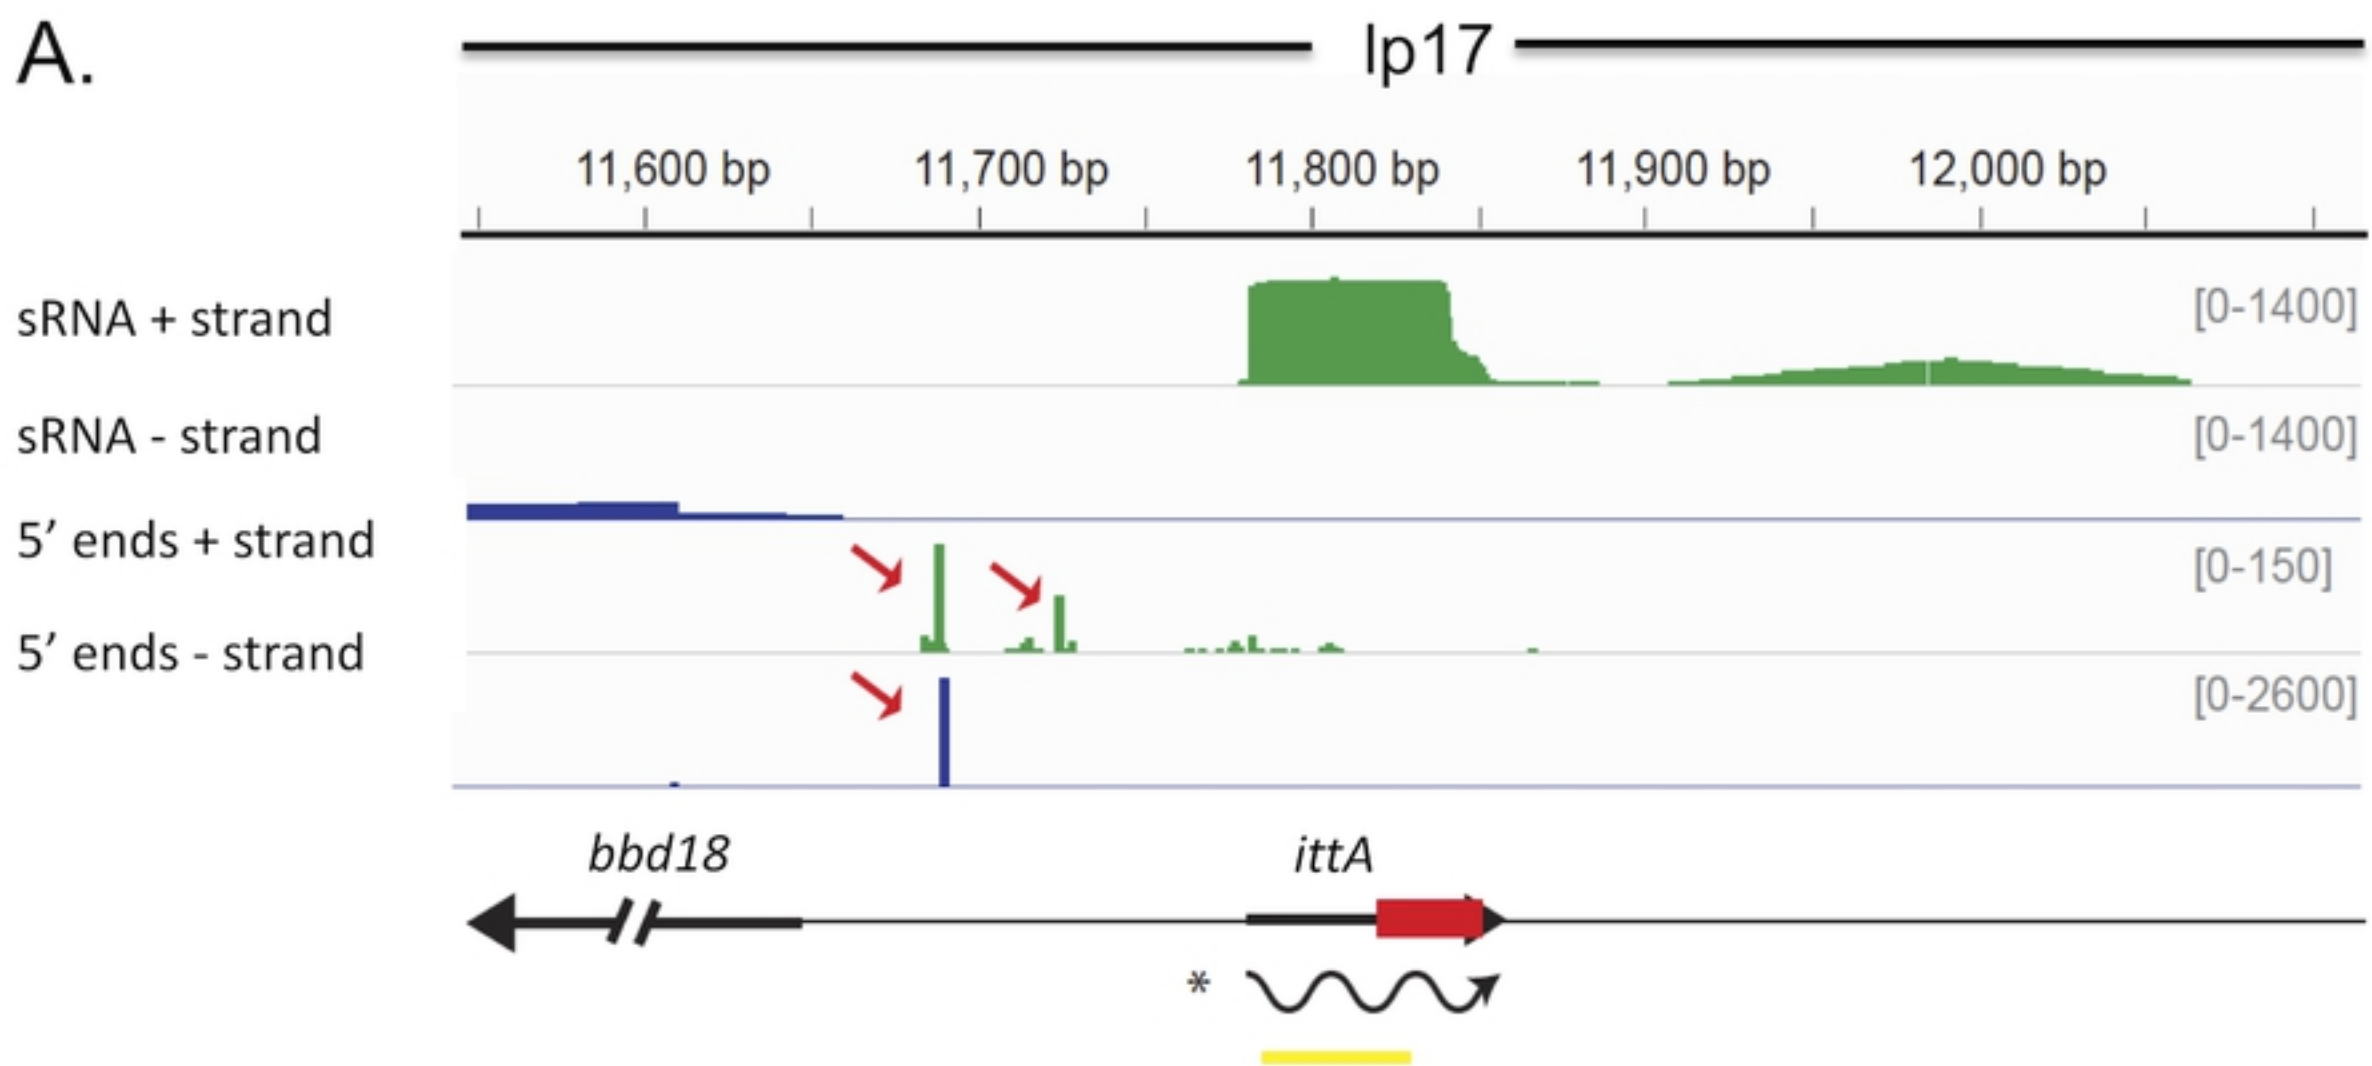

**B.**

| ID                       | Replicon | Strand | 5' Primary Transcription Start Sites (TSS) <sup>b</sup> |
|--------------------------|----------|--------|---------------------------------------------------------|
| <i>ittA</i> <sup>a</sup> | lp17     | +      | 11,689 nt and 11,725 nt                                 |
| <i>bbd18</i>             | lp17     | -      | 11,691 nt                                               |

<sup>a</sup> *ittA* was identified by deep sequencing of *B. burgdorferi* sRNA libraries [40]

<sup>b</sup> 5' TSS were determined by 5' RNA-seq of *B. burgdorferi* [58]

Figure 1



**A.**

bioRxiv preprint doi: <https://doi.org/10.1101/2020.02.24.962522>; this version posted February 24, 2020. The copyright holder for this preprint (which was not certified by peer review) is the author/funder, who has granted bioRxiv a license to display the preprint in perpetuity. It is made available under aCC-BY 4.0 International license.

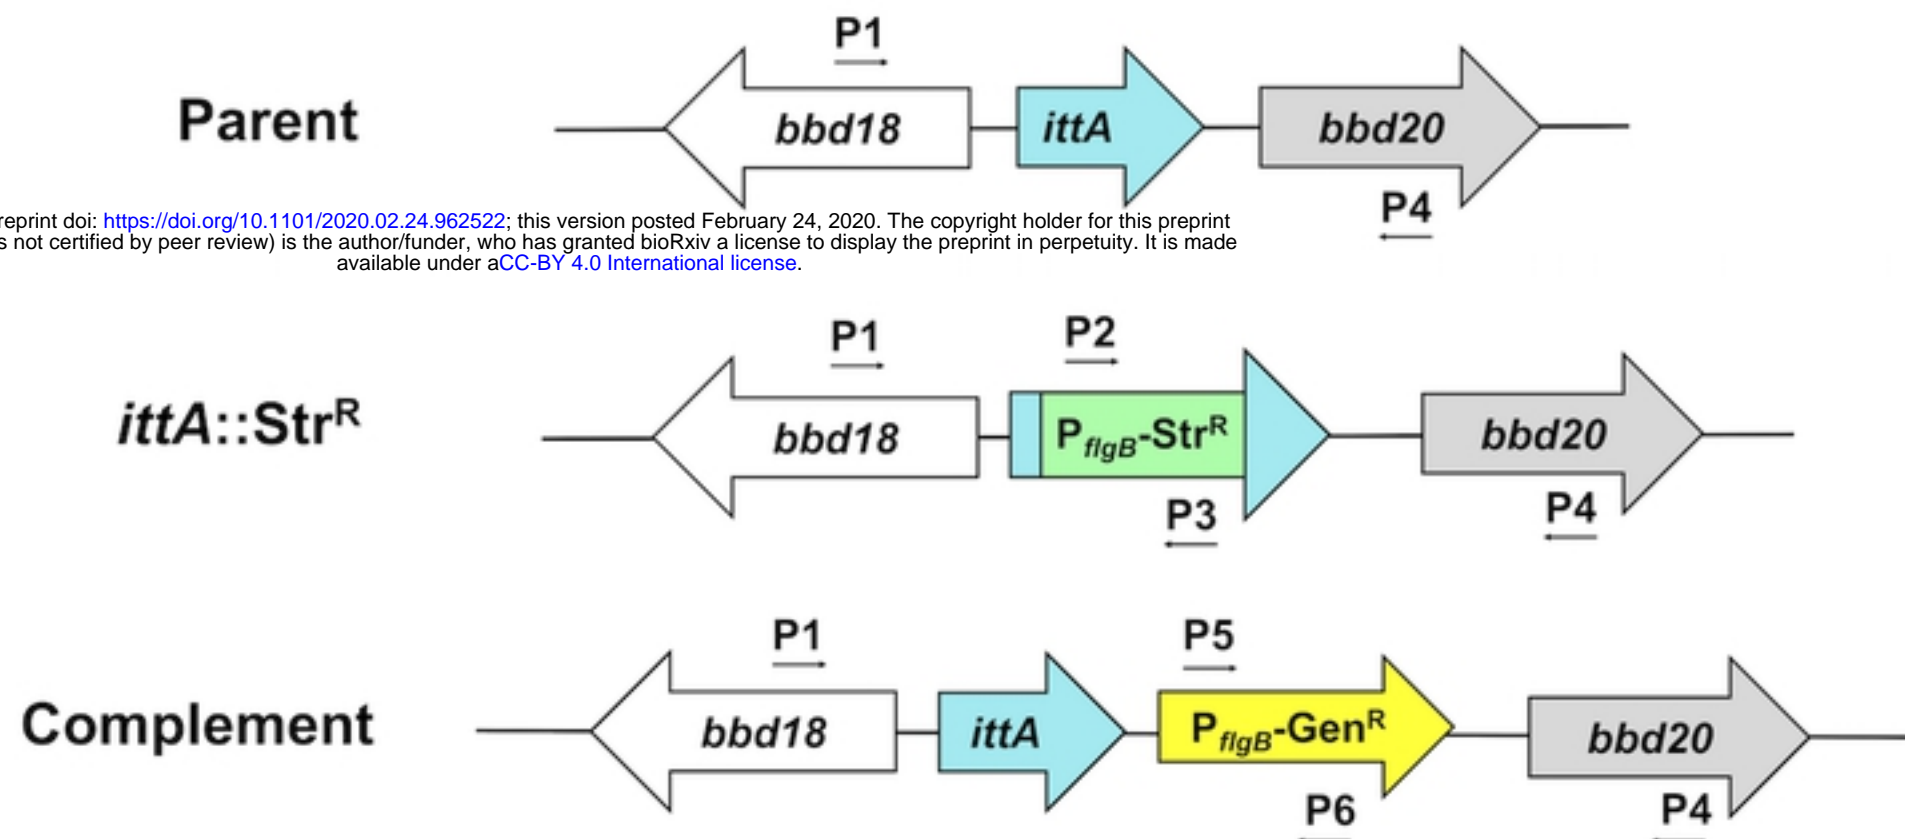**B.**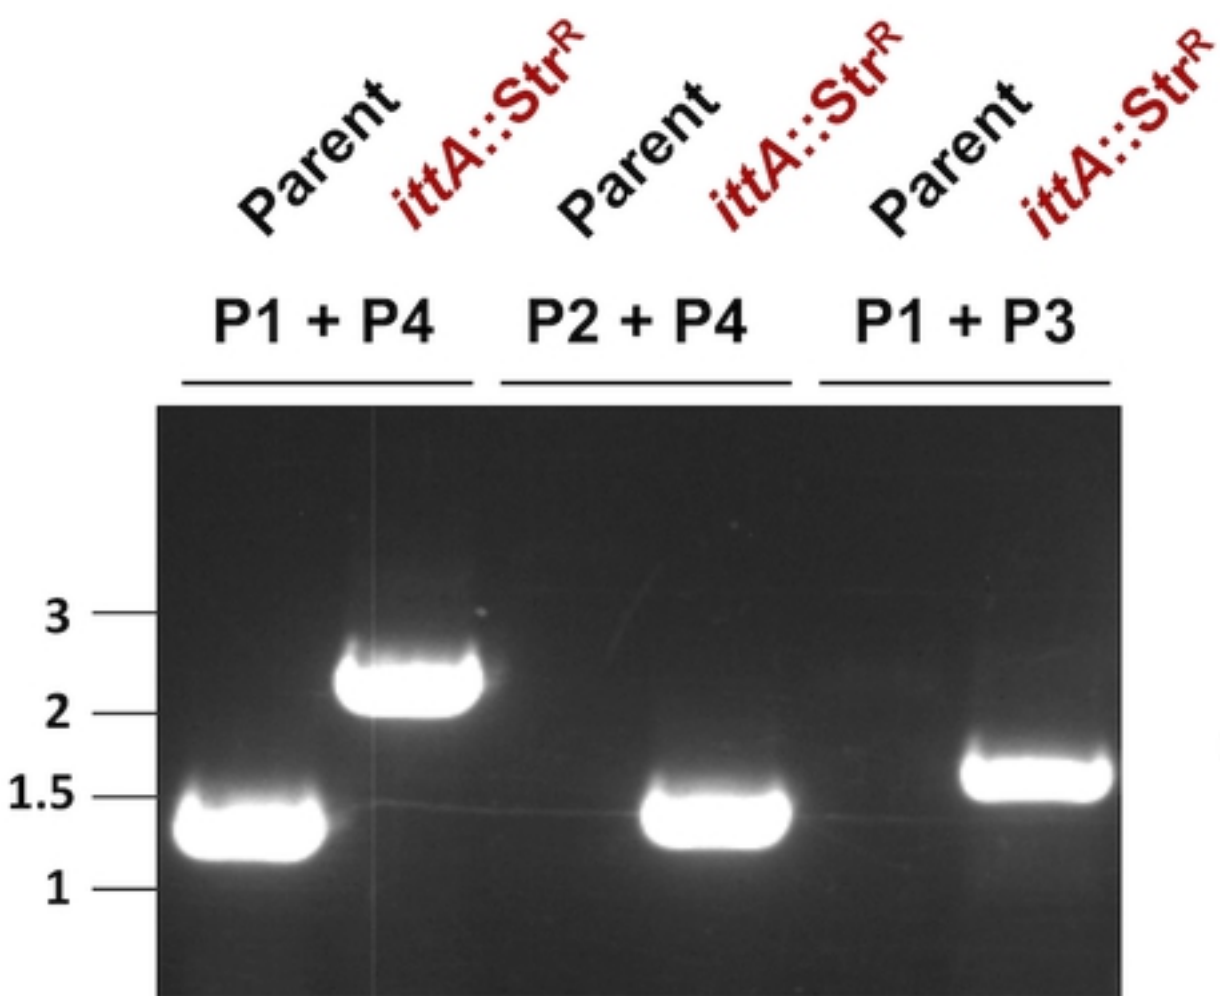**C.**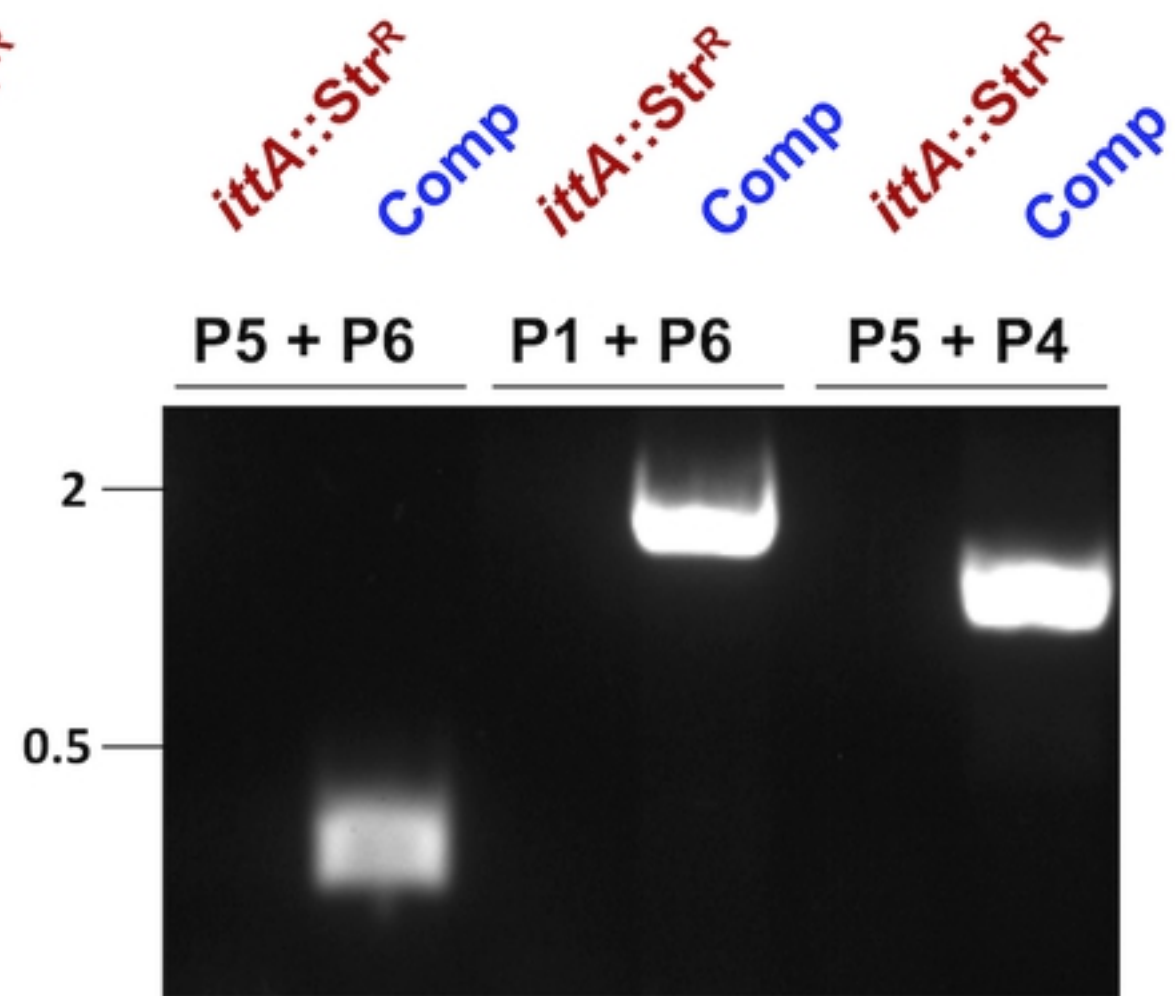

Figure 2

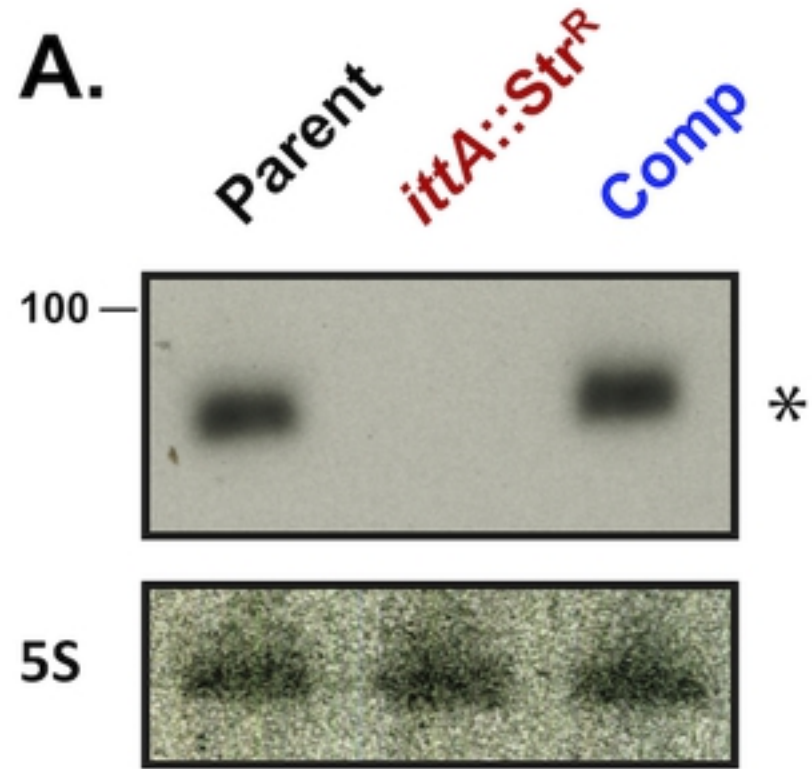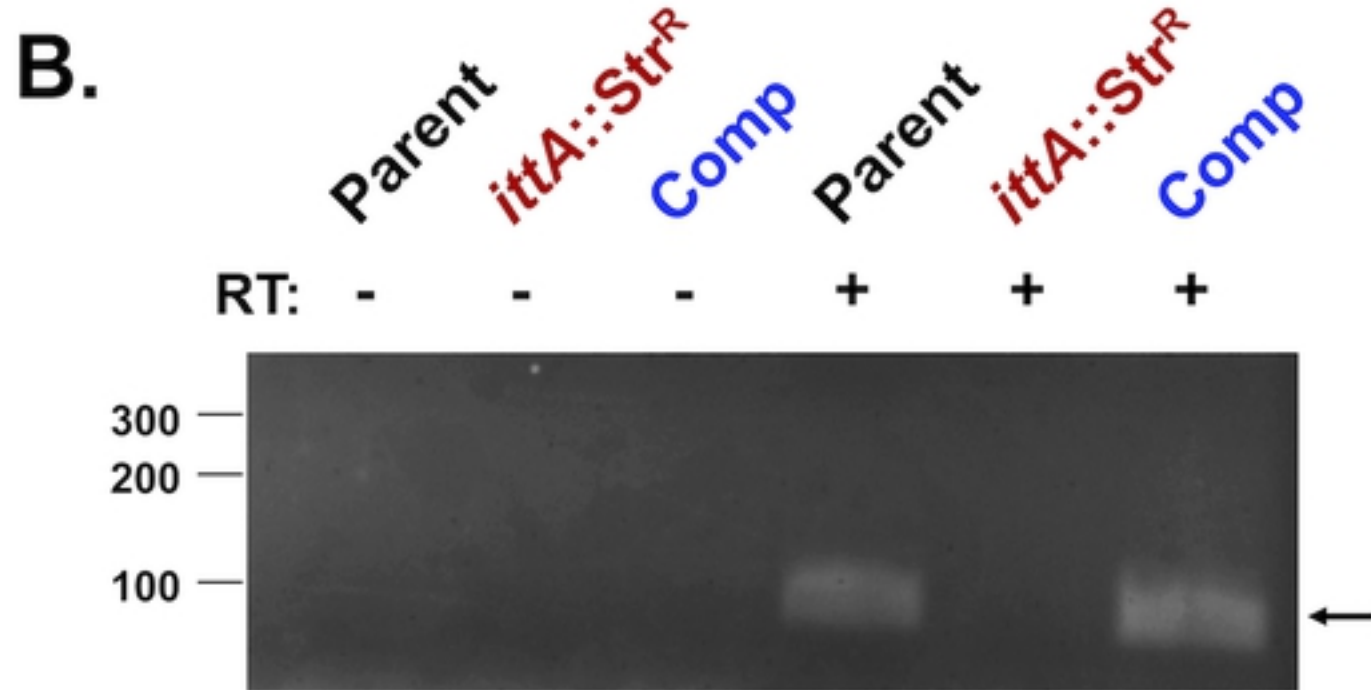

Figure 3



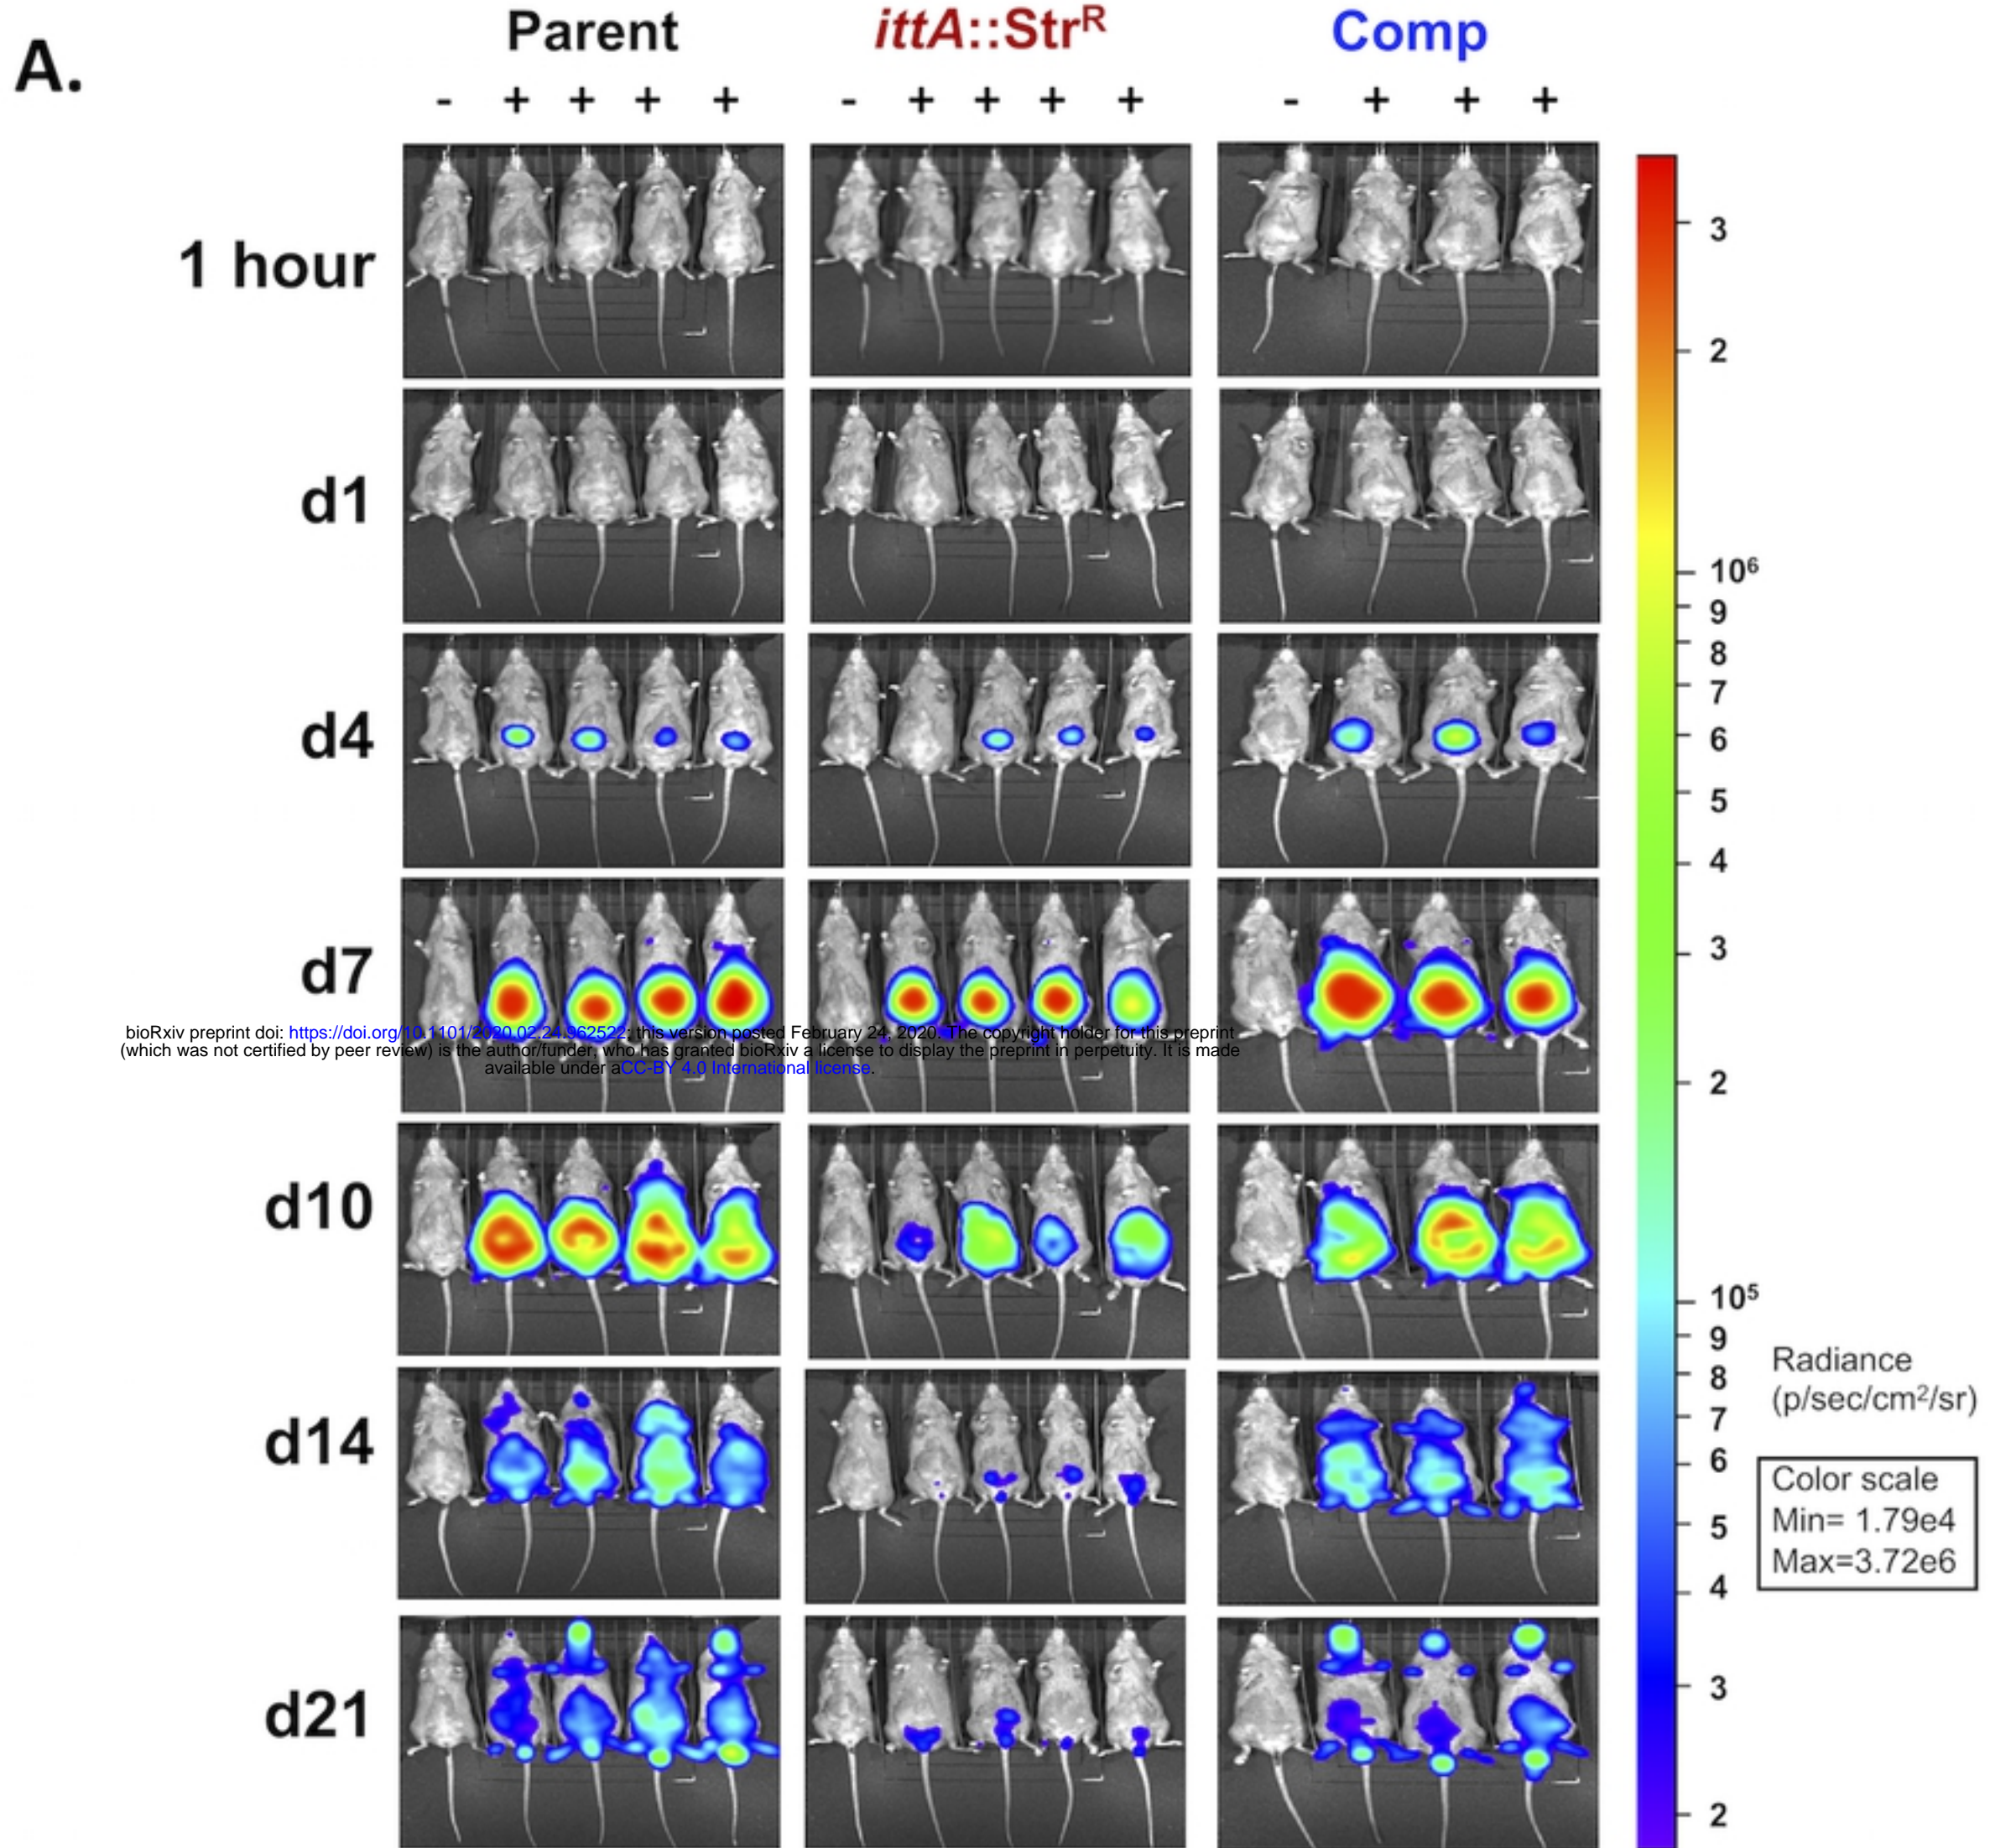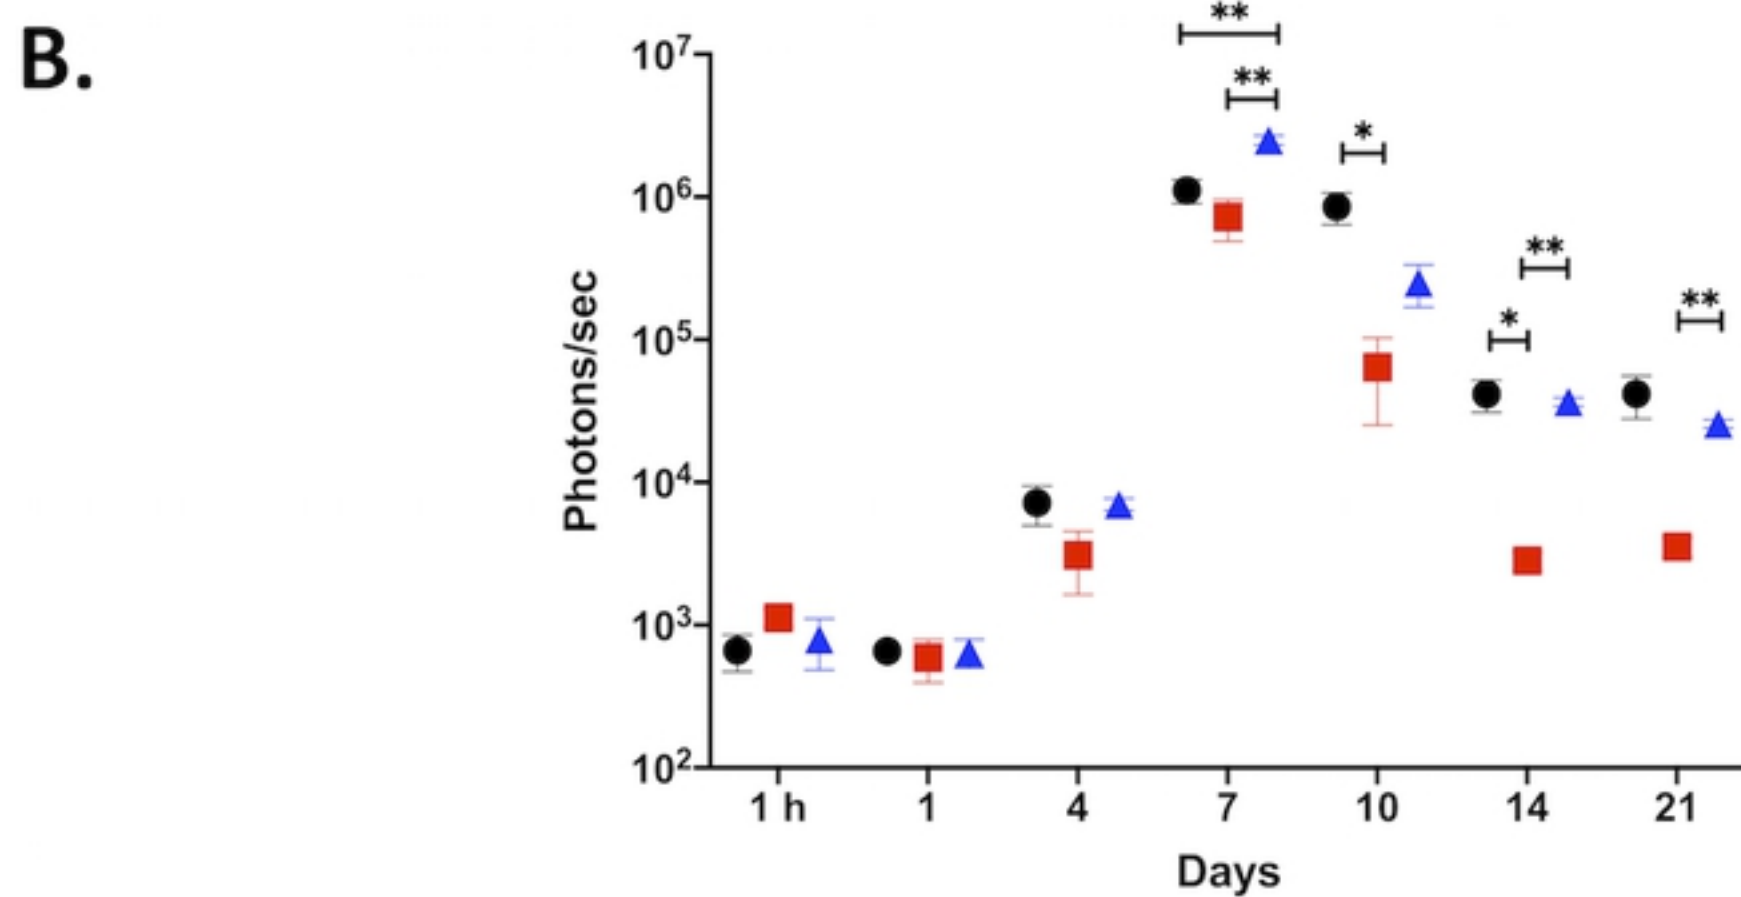

Figure 4

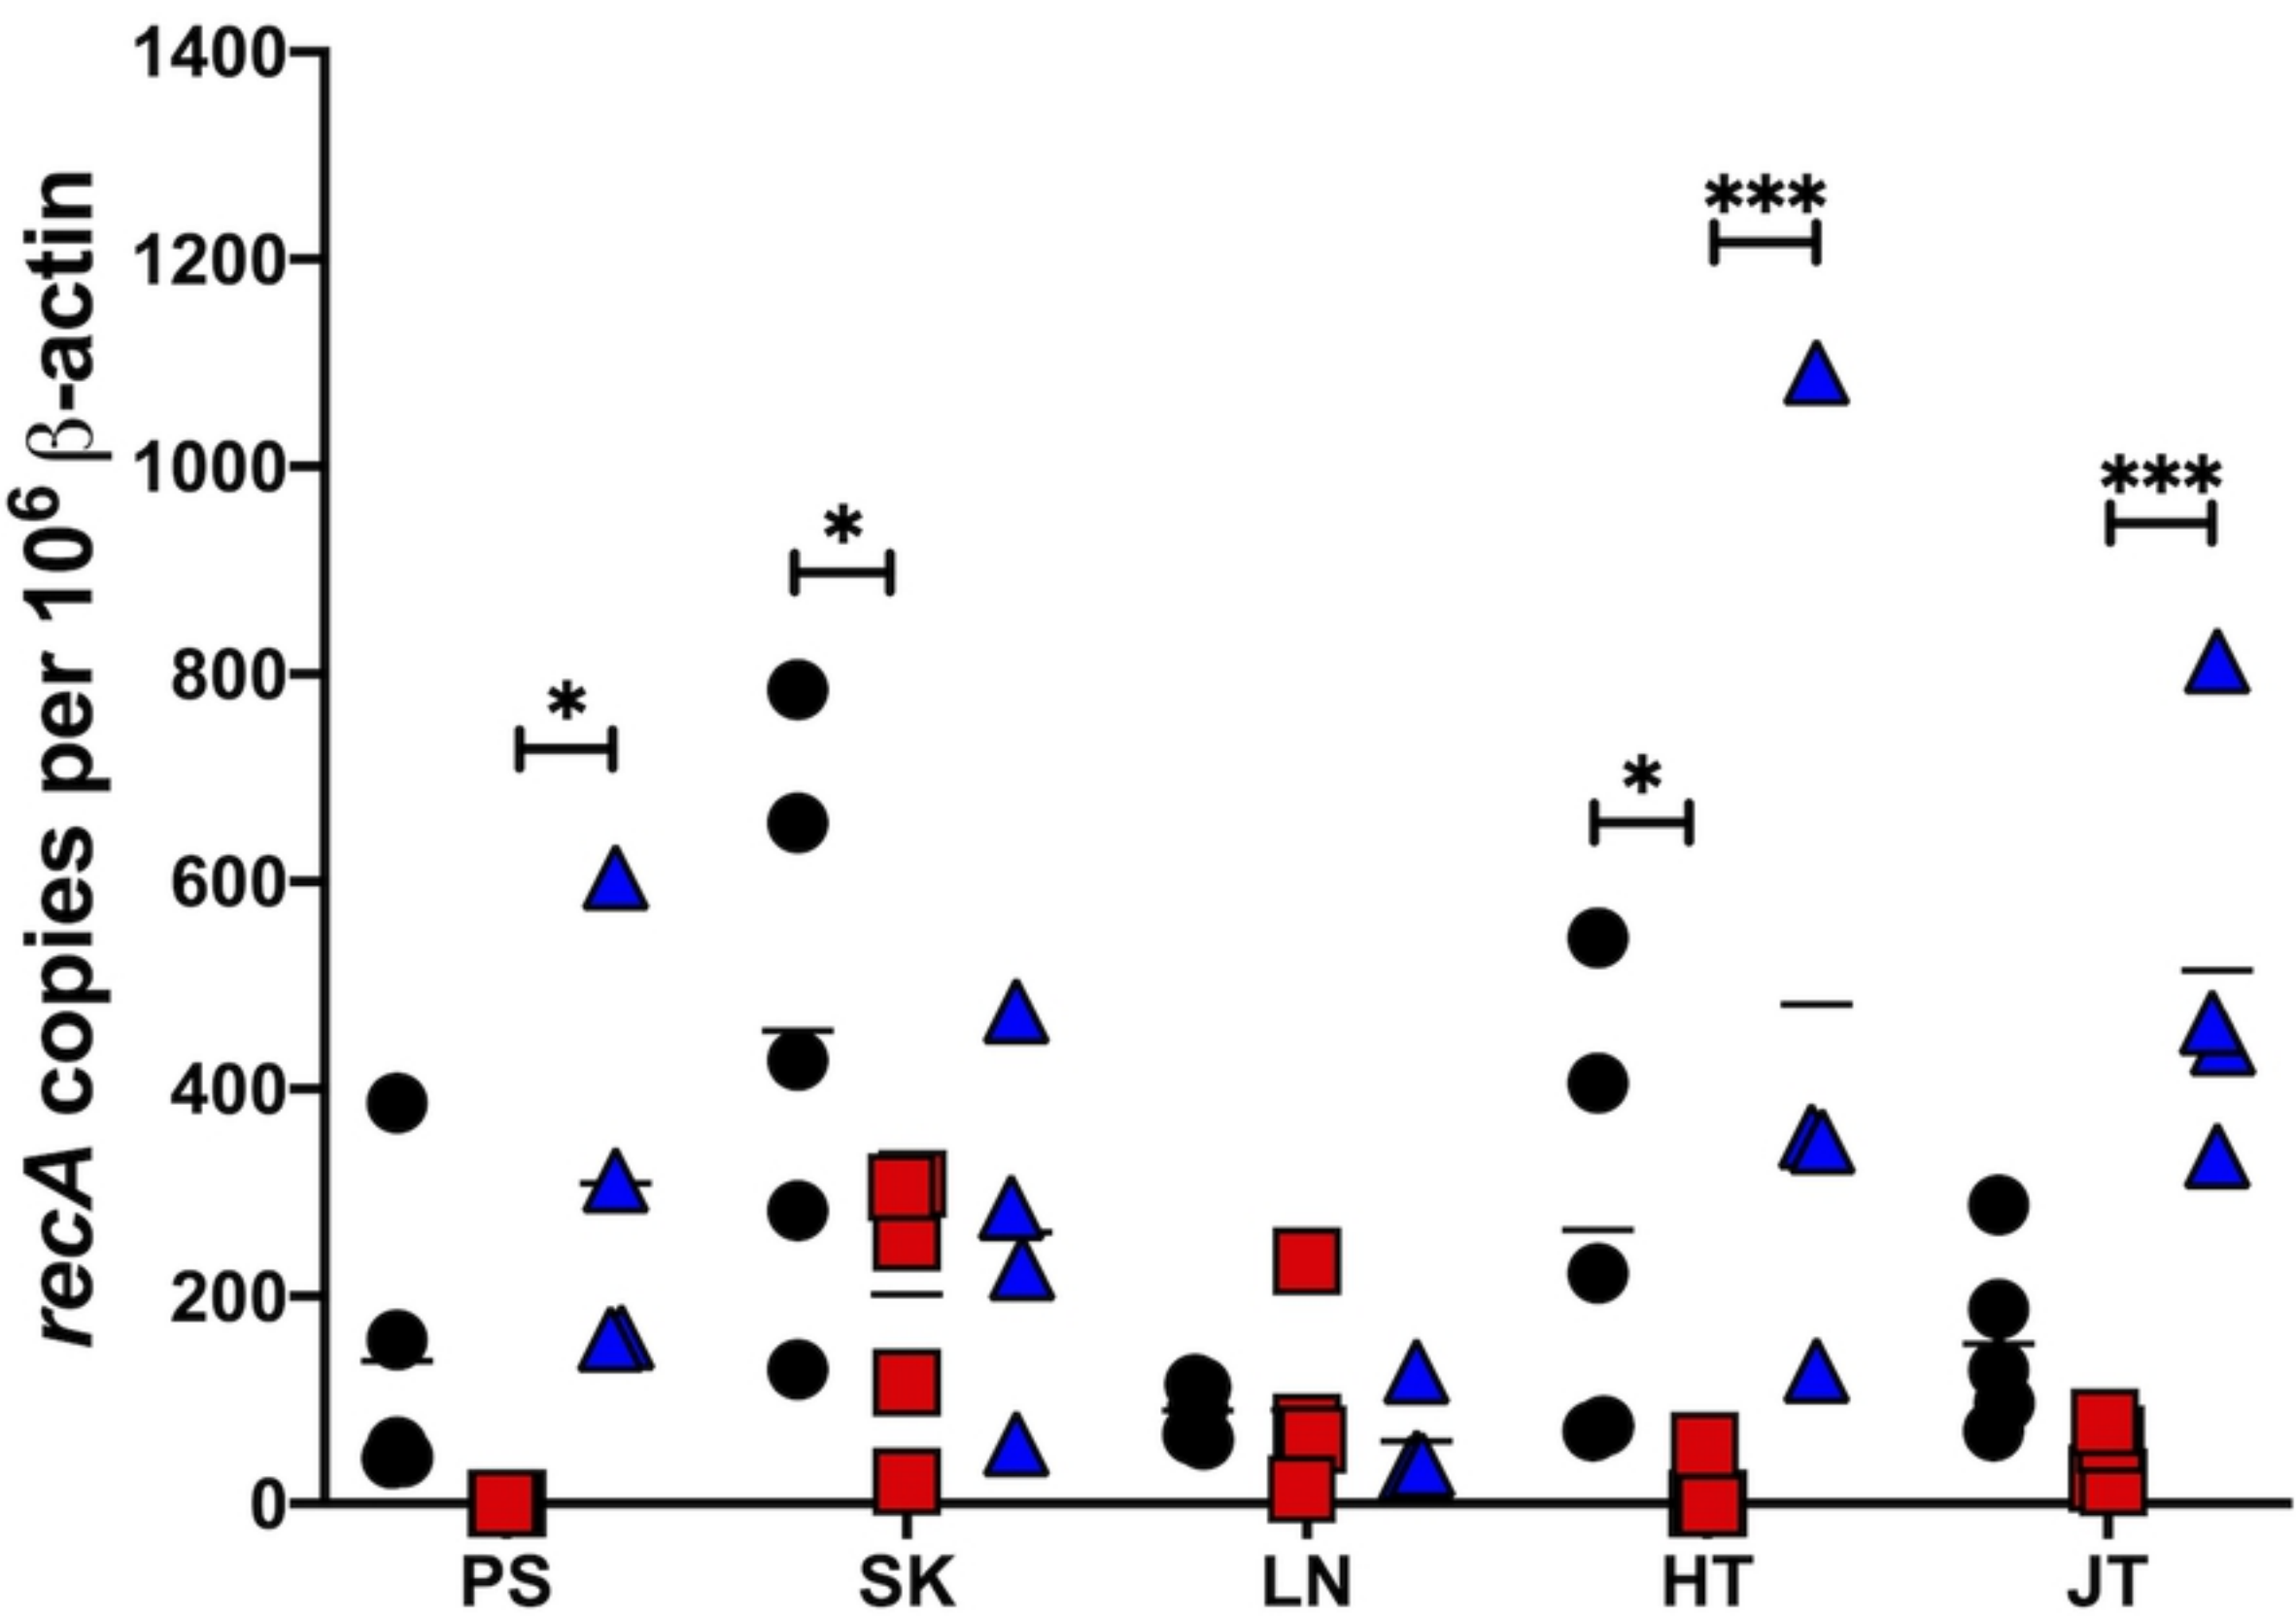

Figure 5



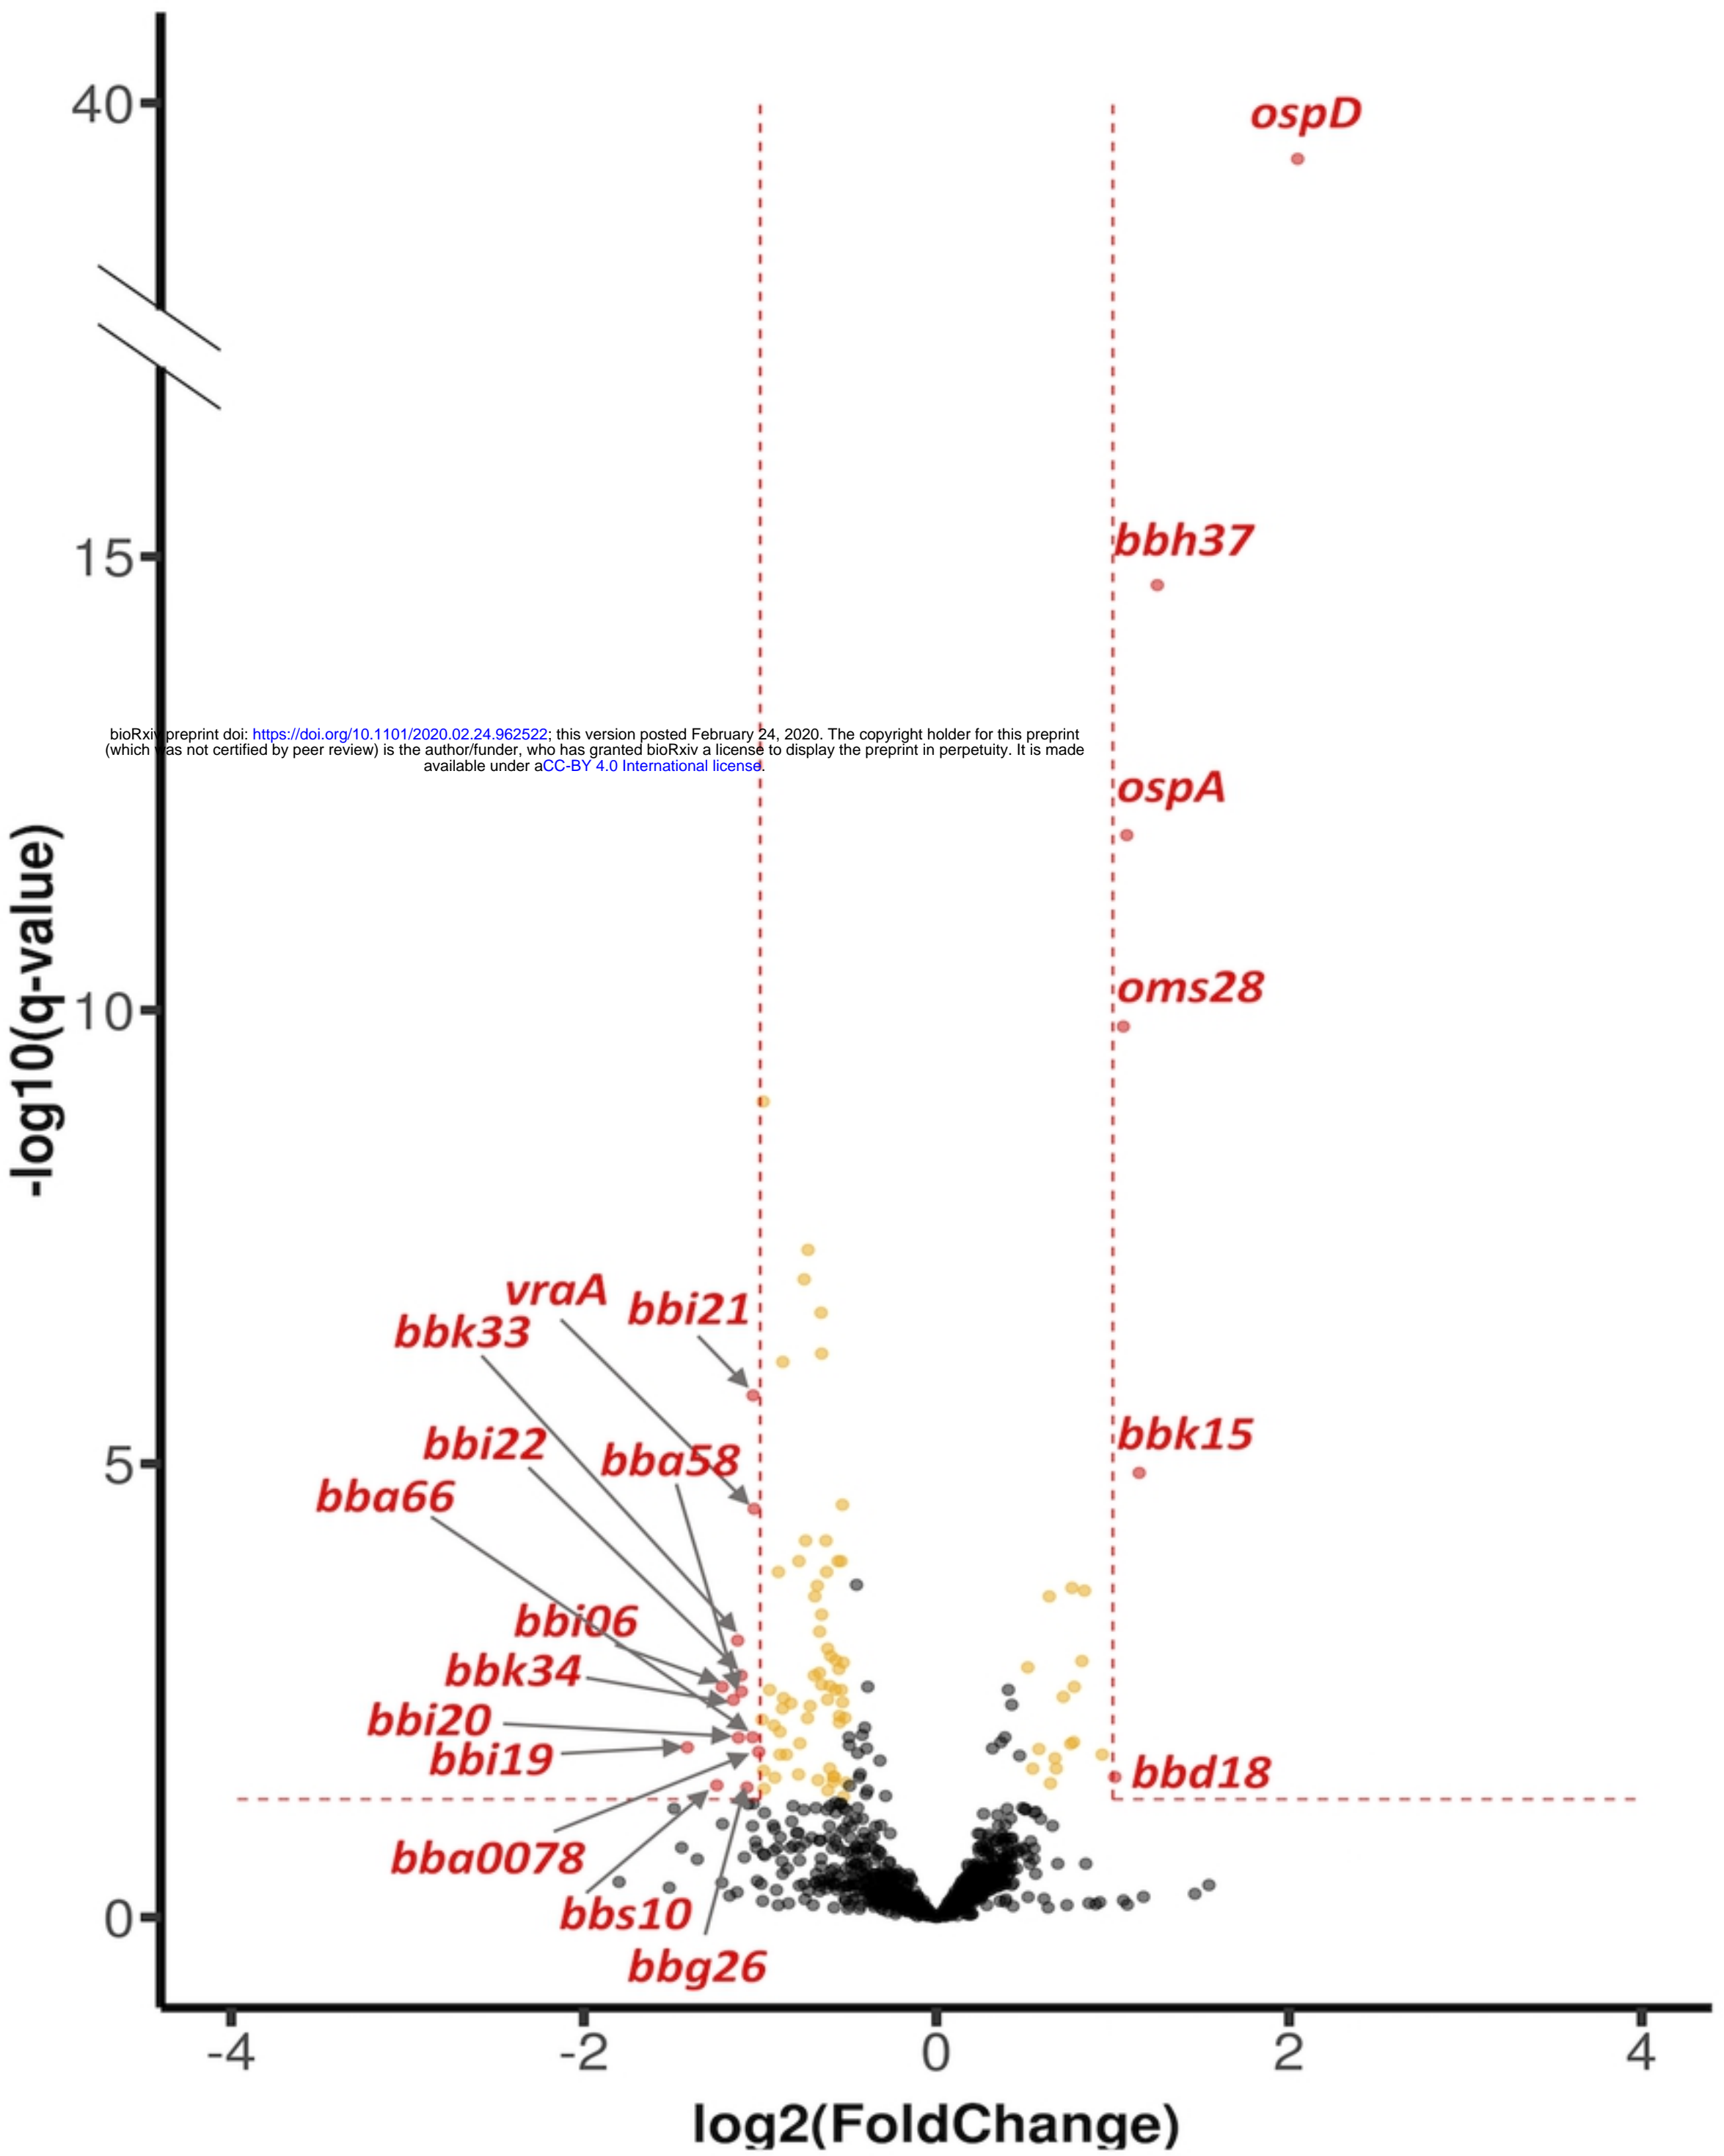

Figure 6

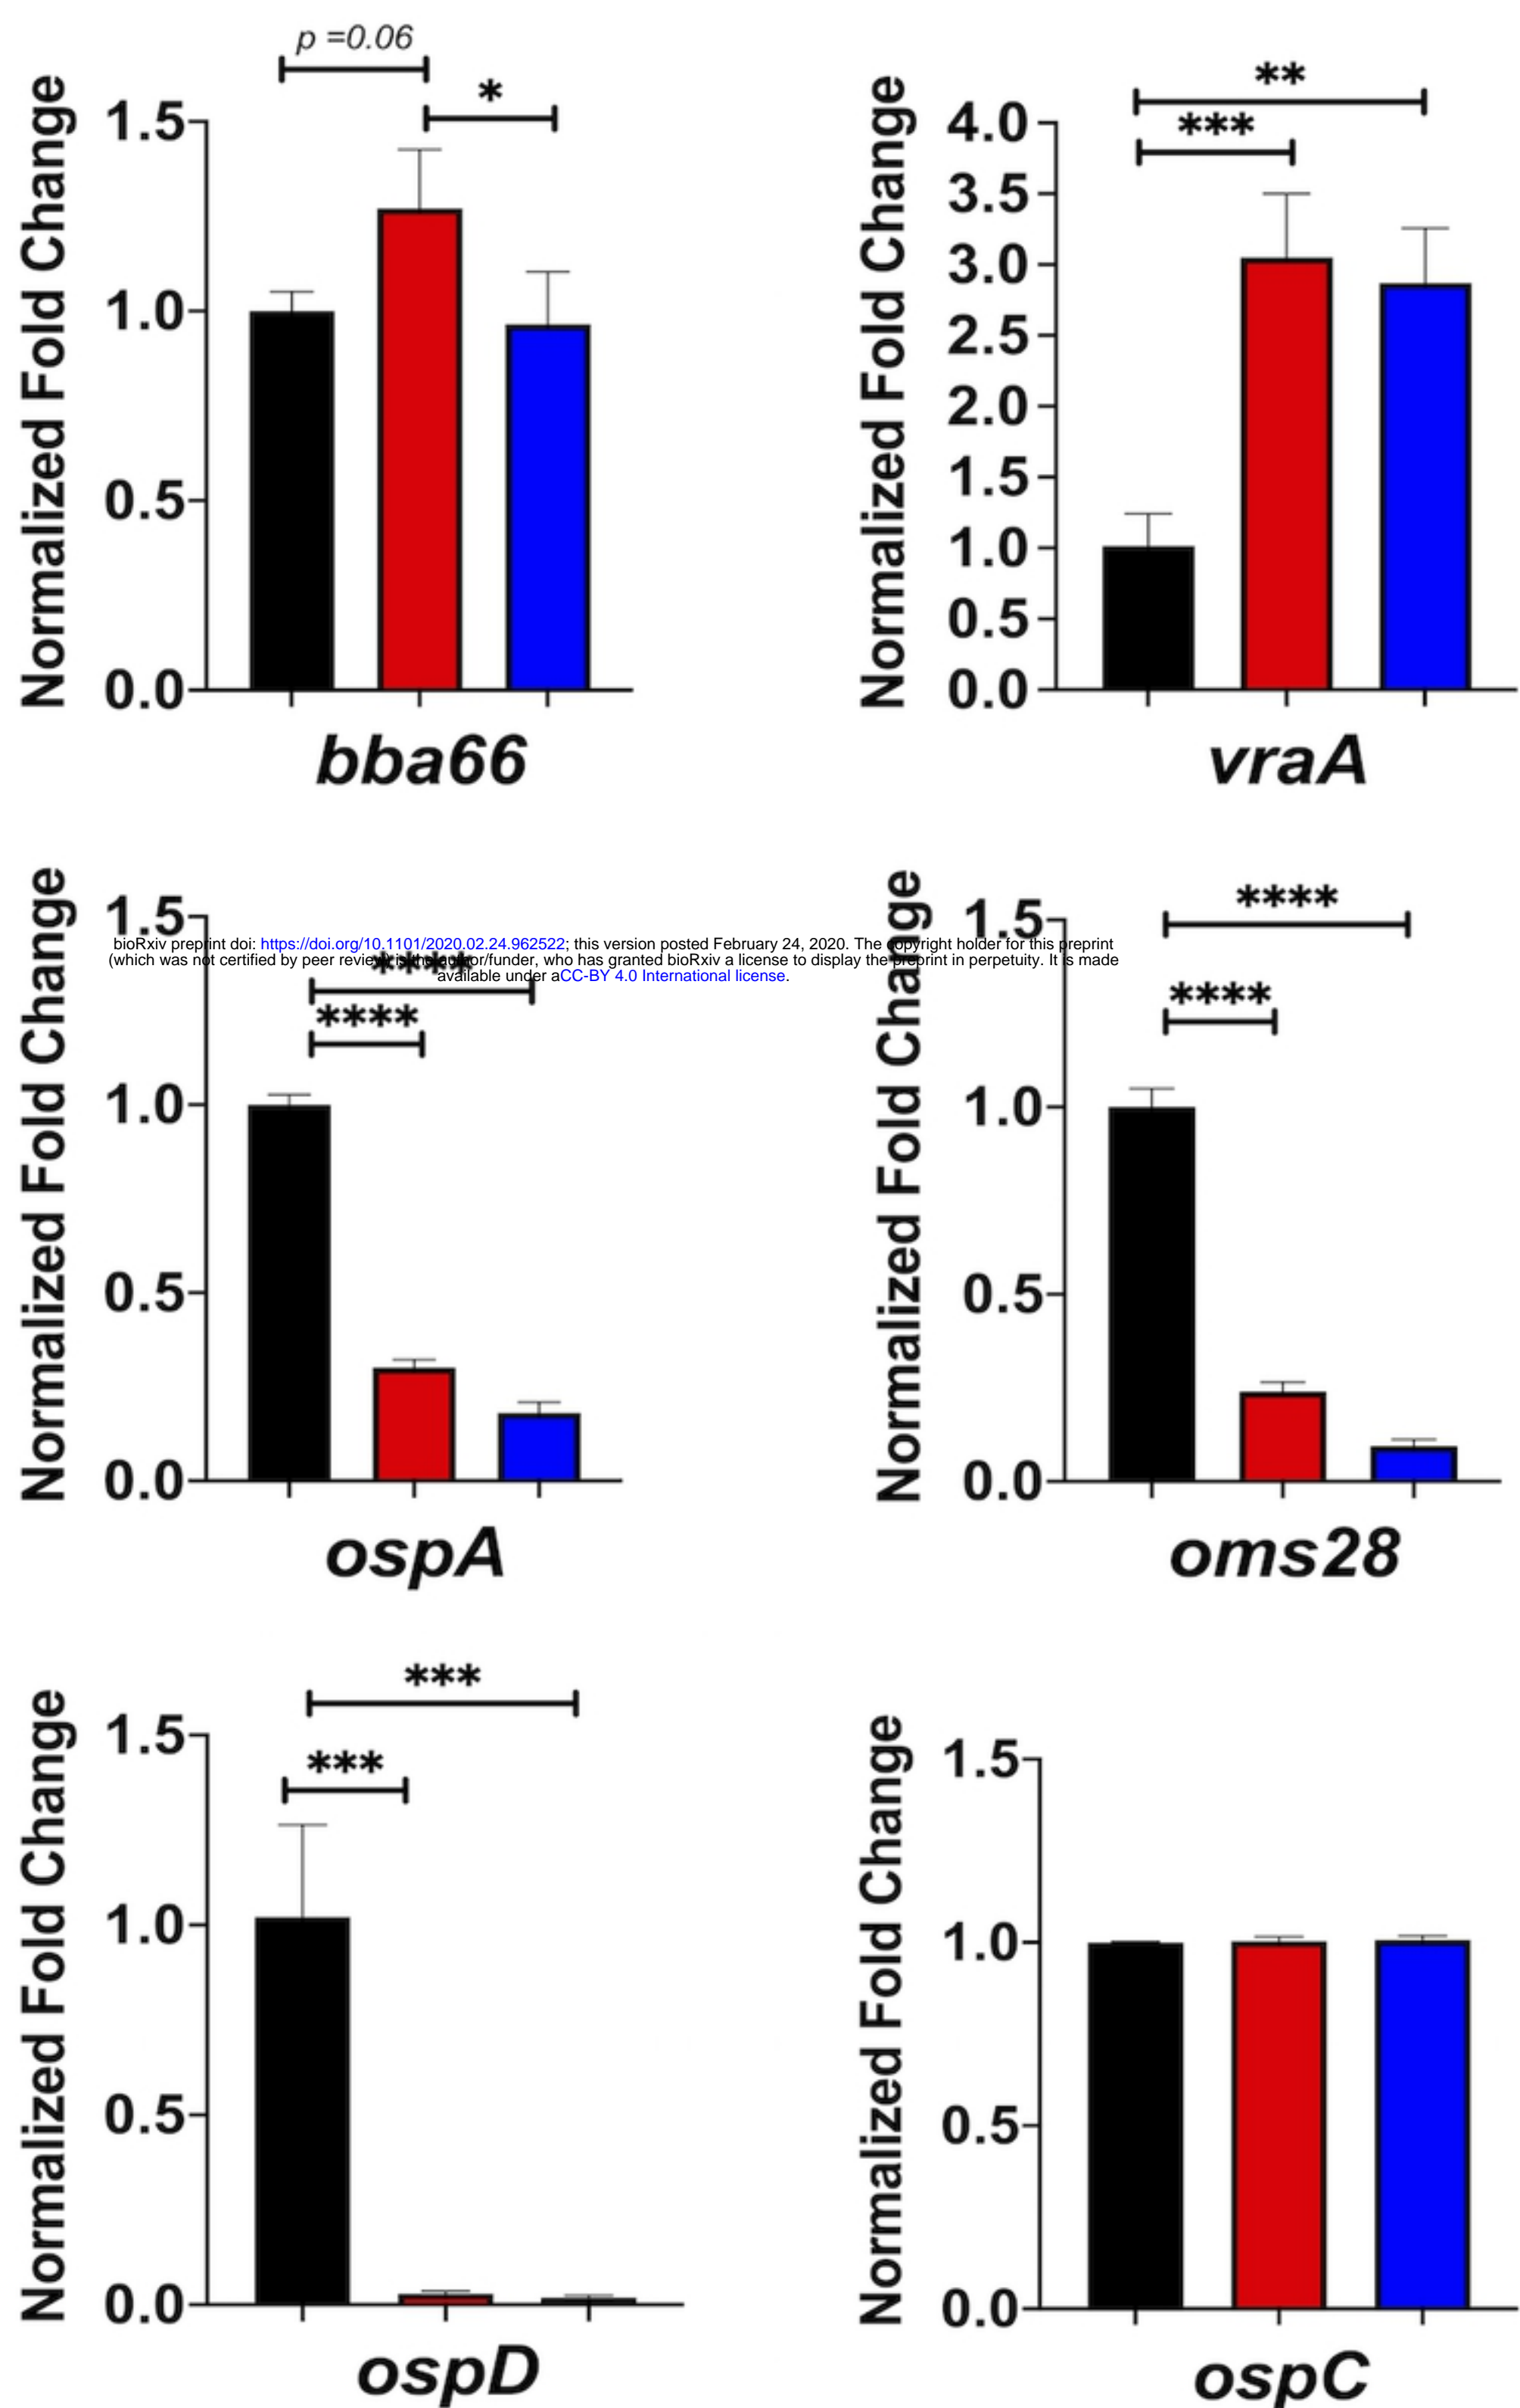

Figure 7

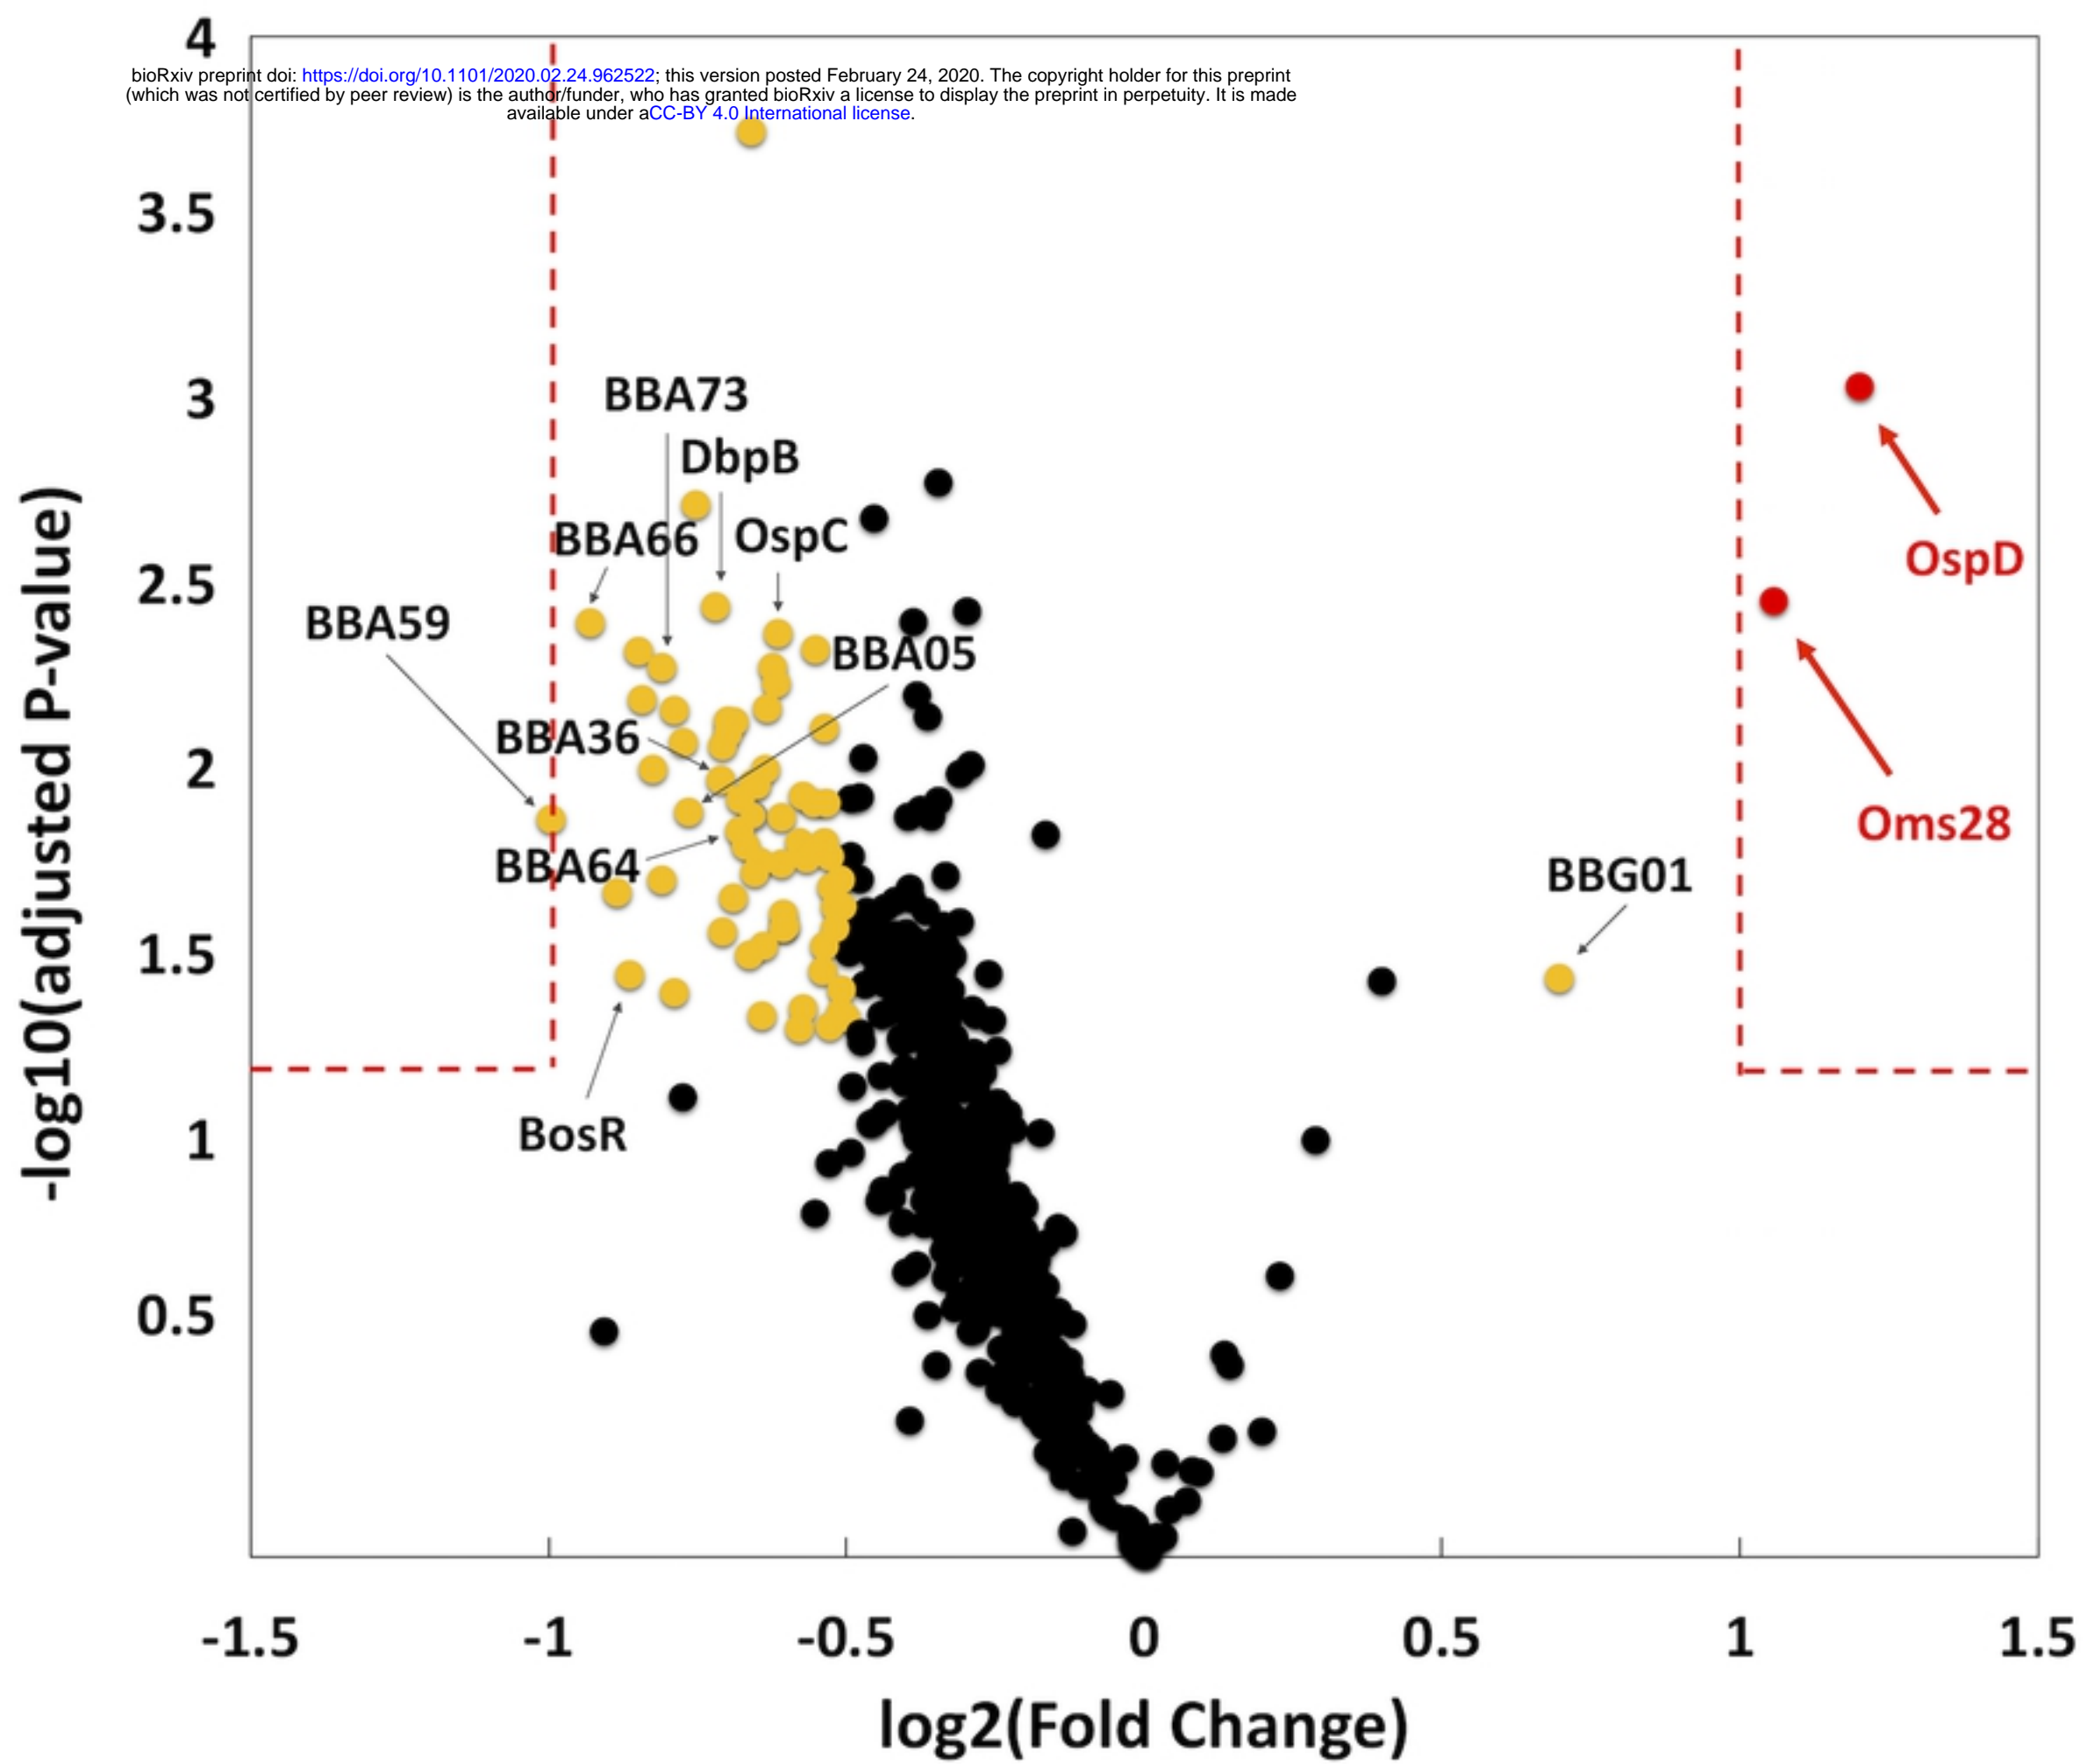

Figure 8

**A.**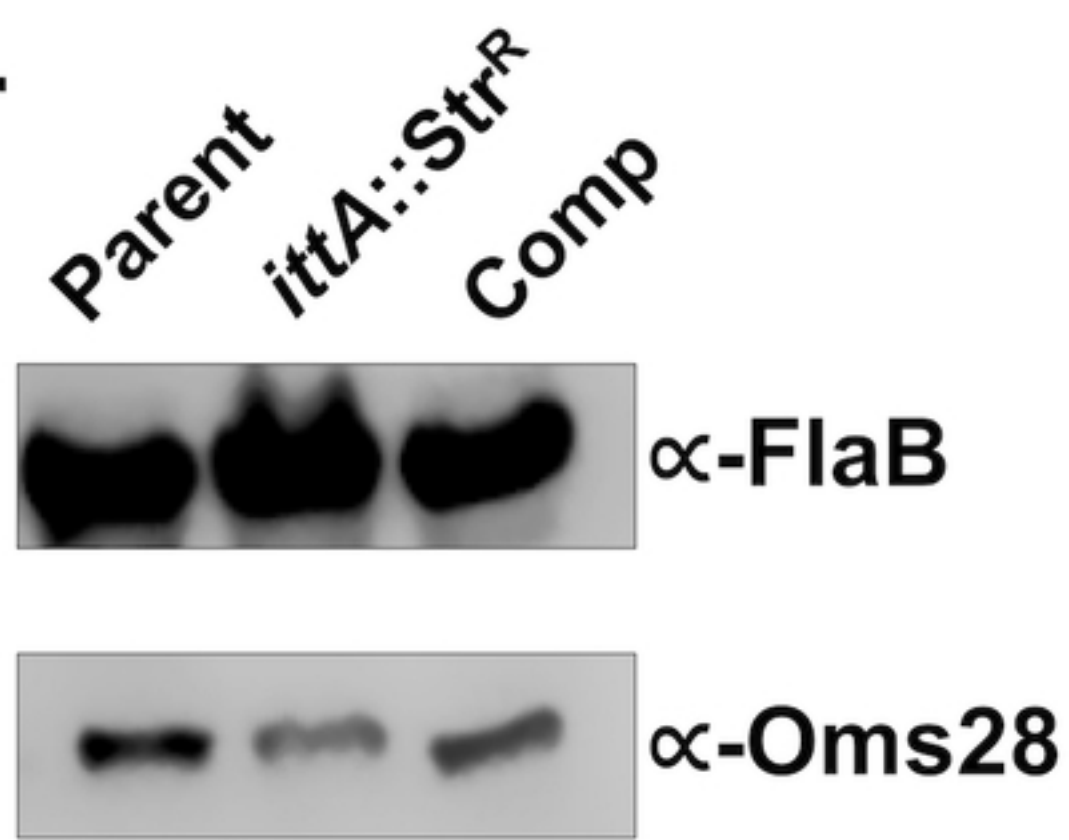**B.**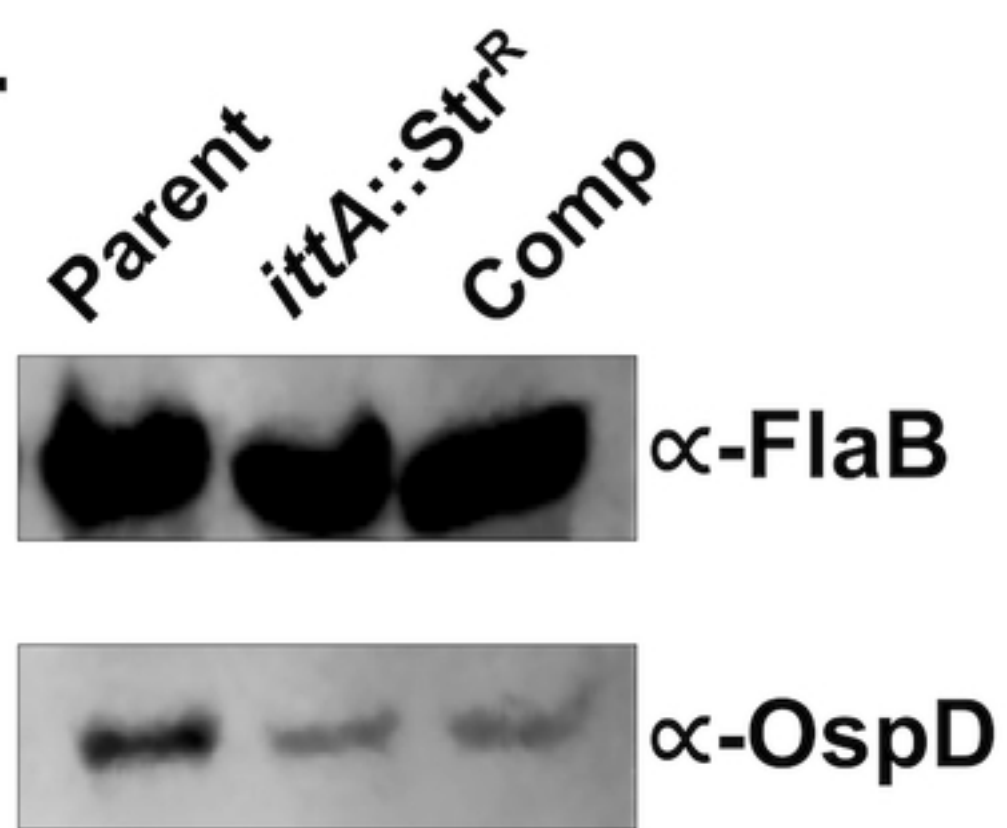

Figure 9



**A.**

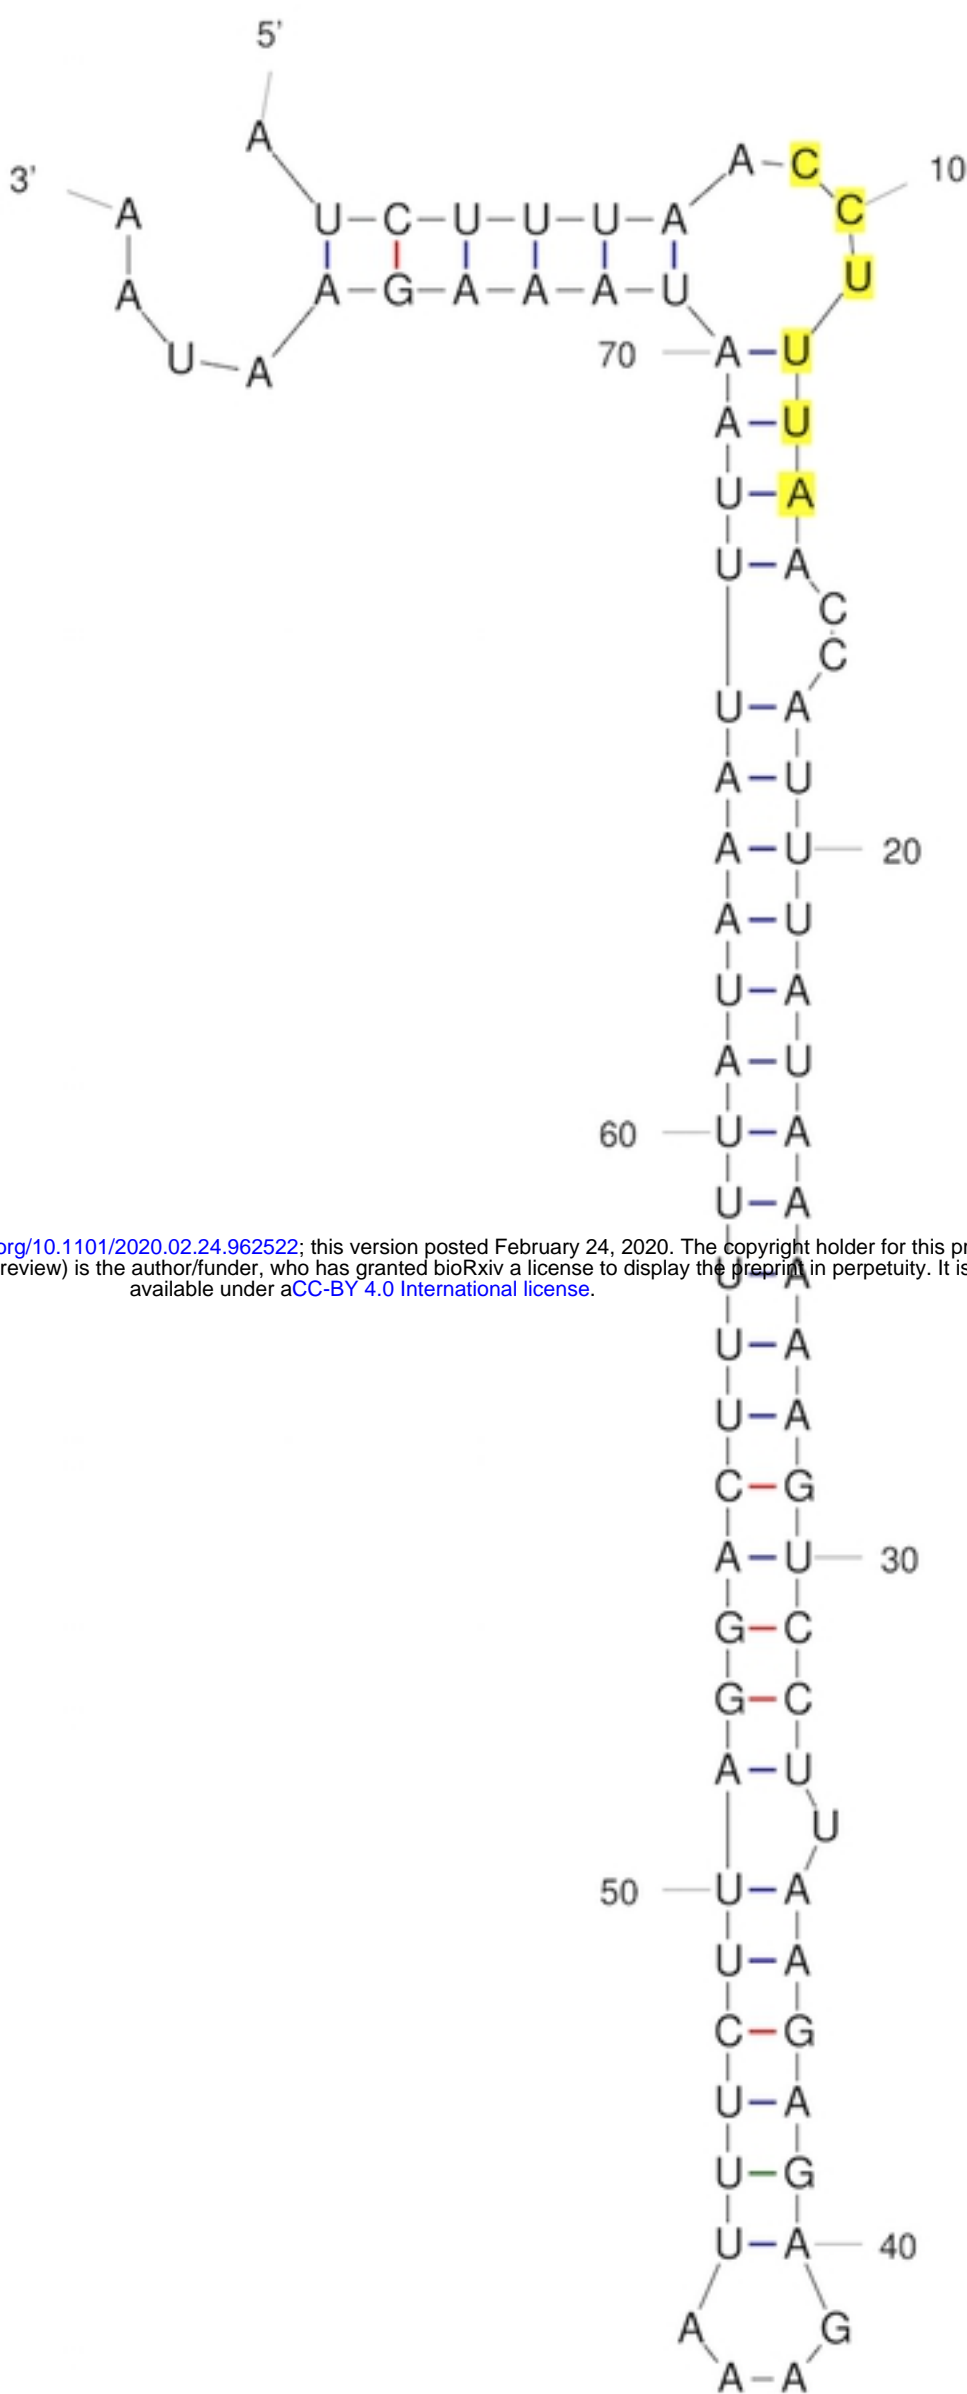

bioRxiv preprint doi: <https://doi.org/10.1101/2020.02.24.962522>; this version posted February 24, 2020. The copyright holder for this preprint (which was not certified by peer review) is the author/funder, who has granted bioRxiv a license to display the preprint in perpetuity. It is made available under aCC-BY 4.0 International license.

**B.**

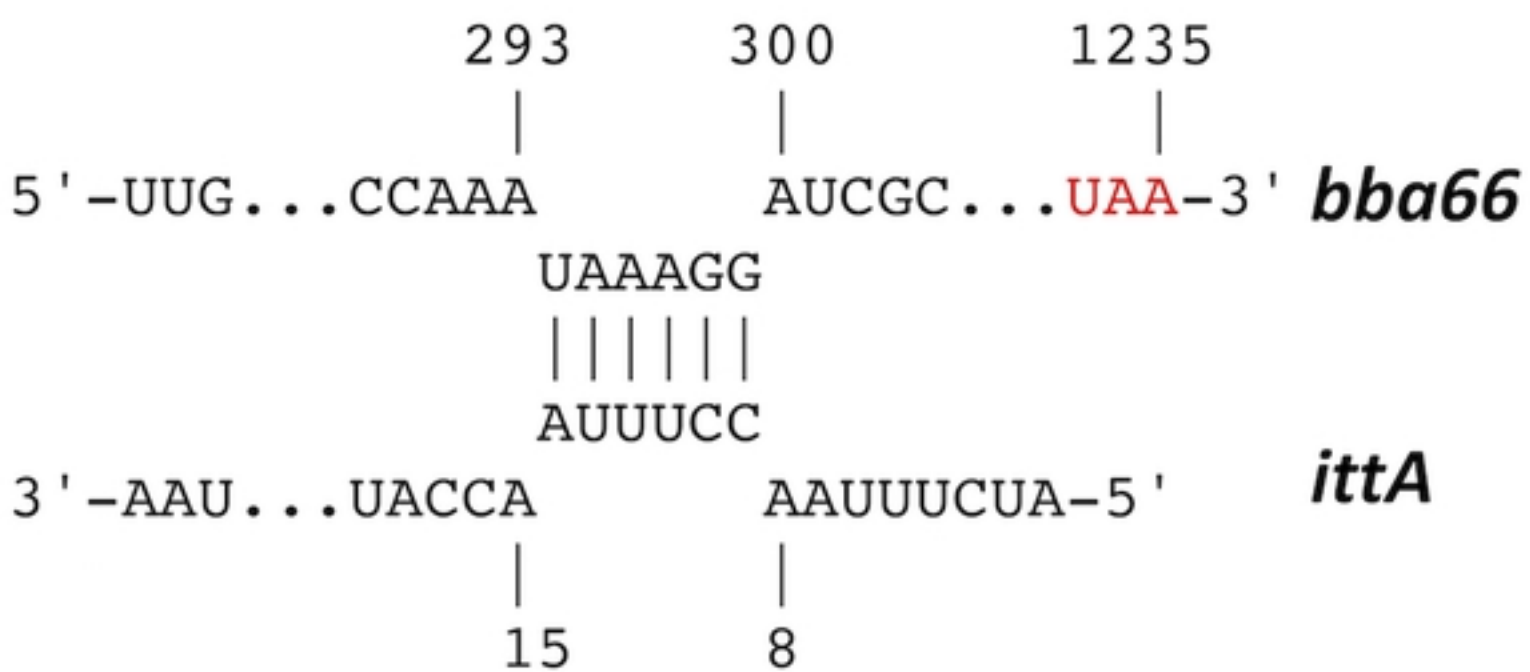

Figure 10
